# Supplementary material for: Solid support mediated chemo and regioselective synthesis of 3H-1,5- benzodiazepines from diversely substituted α-oxo ketene dithioacetals
Source: Royal Society of Chemistry journal article supplement (doi:10.1039/c3ra43347a), 2013-01-01

## Supporting Information

### Solid support mediated chemo and regioselective synthesis of 3H-1,5 benzodiazepines from diversely substituted $\alpha$ -oxo ketene dithioacetals

Nutan Sharma,<sup>a</sup> Tejpal Singh Chundawat,<sup>a</sup> Subash Chandra Mohapatra,<sup>a</sup> Sunita Bhagat<sup>a\*</sup>

<sup>a</sup> *Organic Synthesis Research Laboratory, Department of Chemistry, A.R.S.D. College, University of Delhi, New Delhi-110021, India.*

*Email id: [sunitabhagat28@gmail.com](mailto:sunitabhagat28@gmail.com)*

| S. No. |                                                                   | Page No. |
|--------|-------------------------------------------------------------------|----------|
| 1.     | General                                                           | S2-S2    |
| 2.     | Synthesis of $\alpha$ -oxo ketene dithioacetals ( <b>2a-l</b> )   | S2-S5    |
| 3.     | Synthesis of substituted 3H-1,5-benzodiazepines ( <b>4a-x</b> )   | S5-S12   |
| 4.     | X-ray crystallographic data                                       | S12-S13  |
| 5.     | References                                                        | S14-S14  |
| 6.     | Copies of <sup>1</sup> H and <sup>13</sup> C NMRs ( <b>2a-l</b> ) | S16-S39  |
| 7.     | Copies of <sup>1</sup> H and <sup>13</sup> C NMRs ( <b>4a-x</b> ) | S40-S84  |

## Experimental Section

**General.** The  $^1\text{H}$ -NMR spectra were recorded in  $\text{CDCl}_3$  &  $\text{DMSO-d}_6$  solution on a Jeol JNM-ECX400P at 400 MHz using TMS as internal standard. The  $^{13}\text{C}$ -NMR spectra were recorded in  $\text{CDCl}_3$  &  $\text{DMSO-d}_6$  solution on Jeol JNM-ECX400P at 100 MHz. Thin-layer chromatography was performed using commercially prepared 100-mesh silica gel plates, and visualization was effected with short wavelength UV light (254 nm) and all melting points are uncorrected. Mass spectra were recorded on a micromass instrument (WATERS-KC455, ESI-MS). IR spectra was recorded in  $\text{CHCl}_3$  on a Perkin Elmer Spectrum RX-1 FT-IR spectrophotometer.

**Reagents.** All reagents were used directly as obtained commercially unless otherwise noted. Anhydrous forms of diethylether, THF, toluene, ethanol, hexanes, ethyl acetate, and  $\text{CH}_2\text{Cl}_2$  were purchased from Merck Chemical Co. Aromatic and heterocyclic ketones, o-phenylenediamine, 3,4-Diaminotoluene, Silica gel, Neutral alumina, Basic alumina, Acidic alumina and Montmorillonite KSF were purchased from Aldrich Chemical Co., Inc.

**General procedure for the synthesis of  $\alpha$ -oxo ketene dithioacetals (2a-l) :** The procedure for the synthesis of  $\alpha$ -oxo ketene dithioacetals is previously reported.<sup>1</sup>

The compounds **2a**, **2b**, **2e**, **2f** are previously reported<sup>2</sup>.

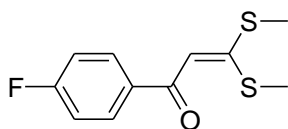

**1-(4-Fluoro-phenyl)-3,3-bis-methylsulfanyl-propenone (2a).** The

compound was obtained as a yellow crystalline solid, mp 83-85°C:  $^1\text{H}$  NMR (400 MHz,  $\text{CDCl}_3$ ): 7.92-7.88 (multiplet, 2H), 7.08 (t,  $J = 8.79\text{Hz}$ , 2H), 6.68 (s, 1H), 2.51 (s, 6H);  $^{13}\text{C}$  NMR (100 MHz,  $\text{CDCl}_3$ ): 184.05, 166.9, 166.1, 163.6, 135.3, 129.8, 115.3, 108.9, 17.3, 15.0.

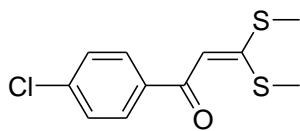

**1-(4-Chloro-phenyl)-3,3-bis-methylsulfanyl-propenone (2b).** The

compound was obtained as a brown crystalline solid, mp 107-109°C:  $^1\text{H}$  NMR (400 MHz,  $\text{CDCl}_3$ ):  $\delta$  7.83 (d,  $J = 8.05$  Hz, 2H), 7.38 (d,  $J = 8.79$  Hz, 2H), 6.68 (s, 1H), 2.54 (s, 3H), 2.51 (s, 3H);  $^{13}\text{C}$  NMR (100 MHz,  $\text{CDCl}_3$ ):  $\delta$  184.1, 167.4, 137.8, 137.5, 129.0, 128.6, 108.7, 17.3, 15.0.

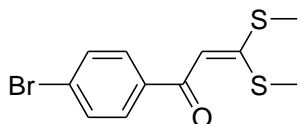

**1-(4-Bromo-phenyl)-3,3-bis-methylsulfanyl-propenone (2c).** The

compound was obtained as a brown solid, mp 88-90°C:  $^1\text{H}$  NMR (400 MHz,  $\text{CDCl}_3$ ): 7.76 (d,  $J = 8.79$  Hz, 2H), 7.55 (d,  $J = 8.79$  Hz, 2H), 6.67 (s, 1H), 2.54 (s, 3H), 2.51 (s, 3H);  $^{13}\text{C}$  NMR (100 MHz,  $\text{CDCl}_3$ ):  $\delta$  184.2, 167.6, 138.02, 131.6, 129.2, 126.5, 108.6, 17.3, 15.0.

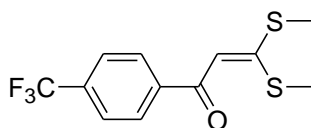

**3,3-Bis-methylsulfanyl-1-(4-trifluoromethyl-phenyl)-propenone (2d).**

The compound was obtained as a dark yellow solid, mp 84-86°C:  $^1\text{H}$  NMR (400 MHz,  $\text{CDCl}_3$ ): 7.98 (d,  $J = 8.05$  Hz, 2H), 7.67 (d,  $J = 8.05$  Hz, 2H), 6.7 (s, 1H), 3.85 (s, 3H), 2.56 (s, 3H), 2.53 (s, 3H);  $^{13}\text{C}$  NMR (100 MHz,  $\text{CDCl}_3$ ):  $\delta$  184.1, 168.8, 142.0, 127.9, 125.4, 108.6, 17.3, 15.0.

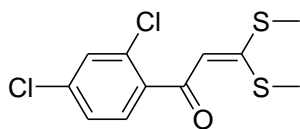

**1-(2,4-Dichloro-phenyl)-3,3-bis-methylsulfanyl-propenone (2e).** The

compound was obtained as a off-white solid, mp 113-115°C:  $^1\text{H}$  NMR (400 MHz,  $\text{CDCl}_3$ ): 7.47 (d,  $J = 8.05$  Hz, 1H), 7.39 (d,  $J = 2.2$  Hz, 1H), 7.27 (dd,  $J = 6.59, 2.2$  Hz, 1H), 6.46 (s, 1H), 2.52 (s, 3H), 2.48 (s, 3H);  $^{13}\text{C}$  NMR (100 MHz,  $\text{CDCl}_3$ ):  $\delta$  185.02, 167.7, 138.8, 136.2, 131.6, 130.8, 129.9, 127.2, 112.5, 17.2, 15.0.

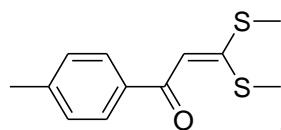

**3,3-Bis-methylsulfanyl-1-p-tolyl-propenone (2f).** The compound was

obtained as a dark orange brown solid, mp 96-98°C:  $^1\text{H}$  NMR (400 MHz,  $\text{CDCl}_3$ ): 7.81 (d,  $J =$

8.79 Hz, 2H), 7.22 (d,  $J = 8.05$  Hz, 2H), 6.75 (s, 1H), 2.54 (s, 3H), 2.52 (s, 3H), 2.39 (s, 3H);  $^{13}\text{C}$  NMR (100 MHz,  $\text{CDCl}_3$ ):  $\delta$  185.3, 165.5, 142.2, 136.58, 129.0, 127.7, 109.4, 21.4, 17.2, 14.9.

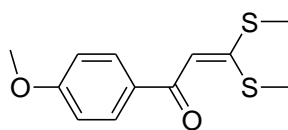

**1-(4-methoxy-phenyl)-3,3-bis-methylsulfanyl-propenone (2g).** The

compound was obtained as a yellow solid, mp 98-100°C:  $^1\text{H}$  NMR (400 MHz,  $\text{CDCl}_3$ ): 7.89 (d,  $J = 8.79$  Hz, 2H), 6.91 (d,  $J = 8.79$  Hz, 2H), 6.73 (s, 1H), 3.83 (s, 3H), 2.53 (s, 3H), 2.50 (s, 3H);  $^{13}\text{C}$  NMR (100 MHz,  $\text{CDCl}_3$ ):  $\delta$  184.4, 164.8, 162.4, 131.9, 129.7, 113.5, 109.3, 55.3, 17.2, 14.9.

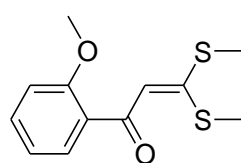

**1-(2-Methoxy-phenyl)-3,3-bis-methylsulfanyl-propenone (2h).** The

compound was obtained as a yellow crystalline solid, mp 66-68°C:  $^1\text{H}$  NMR (400 MHz,  $\text{CDCl}_3$ ): 7.71 (dd,  $J = 9.52, 2.20$  Hz, 1H), 7.38 (dt,  $J = 6.59, 2.20$  Hz, 1H), 6.99 (t,  $J = 7.32$  Hz, 1H), 6.92 (d,  $J = 8.05$  Hz, 1H), 6.85 (s, 1H), 3.85 (s, 3H), 2.49 (s, 3H), 2.47 (s, 3H);  $^{13}\text{C}$  NMR (100 MHz,  $\text{CDCl}_3$ ):  $\delta$  185.9, 163.5, 157.3, 132.2, 130.8, 129.7, 120.7, 114.7, 55.5, 17.1, 14.9.

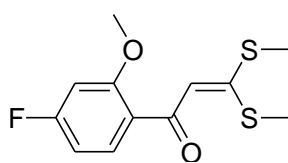

**1-(4-Fluoro-2-methoxy-phenyl)-3,3-bis-methylsulfanyl-propenone (2i).**

The compound was obtained as a pale yellow solid, mp 96-98°C:  $^1\text{H}$  NMR (400 MHz,  $\text{CDCl}_3$ ): 7.77 (dd,  $J = 8.79, 7.32$  Hz, 1H), 6.84 (s, 1H), 6.68 (td,  $J = 8.79, 8.05$  Hz, 2.2, 1H), 6.62 (dd,  $J = 10.98, 2.2$  Hz, 1H), 3.8 (s, 3H), 2.48 (s, 3H), 2.47 (s, 3H);  $^{13}\text{C}$  NMR (100 MHz,  $\text{CDCl}_3$ ):  $\delta$  184.3, 166.5, 164.0, 158.8, 132.6, 125.7, 114.4, 107.7, 99.4, 55.7, 17.2, 15.0.

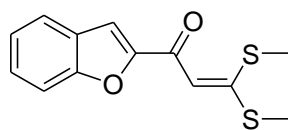

**1-Benzofuran-2-yl-3,3-bis-methylsulfanyl-propenone (2j).** The

compound was obtained as a dark yellow solid, mp 114-116°C:  $^1\text{H}$  NMR (400 MHz,  $\text{CDCl}_3$ ): 7.61 (d,  $J = 7.32$  Hz, 1H), 7.48 (d,  $J = 8.05$  Hz, 1H), 7.41 (s, 1H), 7.36 (t,  $J = 8.05$  Hz, 1H), 7.20 (t,  $J = 8.79$  Hz, 1H), 6.82 (s, 1H), 2.56 (s, 1H), 2.48 (s, 1H);  $^{13}\text{C}$  NMR (100 MHz,  $\text{CDCl}_3$ ):  $\delta$  175.6, 168.1, 155.1, 154.4, 127.7, 127.0, 123.5, 122.7, 112.0, 110.7, 108.8, 17.3, 15.1.

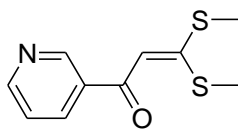

**3,3-Bis-methylsulfanyl-1-pyridin-3-yl-propenone (2k).** The compound was obtained as a yellow solid, mp 103-105°C:  $^1\text{H}$  NMR (400 MHz, DMSO- $d_6$ ): 9.14 (d,  $J = 2.54$  Hz, 1H), 8.72 (dd,  $J = 6.59, 2.2$  Hz, 1H), 8.28 (td,  $J = 8.05, 2.2$  Hz, 1H), 7.52 (dd,  $J = 8.05, 2.2$  Hz, 1H), 6.87 (s, 1H), 2.67 (s, 3H), 2.49 (s, 3H);  $^{13}\text{C}$  NMR (100 MHz,  $\text{CDCl}_3$ ):  $\delta$  182.8, 167.9, 152.2, 148.8, 135.2, 133.9, 123.7, 108.9, 16.8, 14.6.

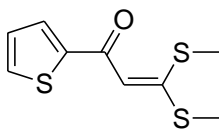

**3,3-Bis-methylsulfanyl-1-thiophen-2-yl-propenone (2l).** The compound was obtained as a dark brown solid, mp 90-92°C:  $^1\text{H}$  NMR (400 MHz, DMSO- $d_6$ ): 7.98 (d,  $J = 2.93$  Hz, 1H), 7.90 (dd,  $J = 5.13$  Hz, 1H), 7.22 (t,  $J = 5.13$  Hz, 1H), 6.79 (s, 1H), 2.66 (s, 3H), 2.49 (s, 3H);  $^{13}\text{C}$  NMR (100 MHz,  $\text{CDCl}_3$ ):  $\delta$  177.5, 165.1, 146.2, 133.3, 130.6, 128.4, 108.9, 16.7, 14.4.

### General Procedure for the synthesis of substituted 3H- 1,5-benzodiazepines (4a-x).

$\alpha$ -oxo ketene dithioacetal **2(a-l)** (1 mmol) and amine (**3a/3b**) (1.5 mmol) were dissolved in diethyl ether (5mL). Basic alumina (1g) was then added to the mixture and stirred for a while followed by removal of the solvent under reduced pressure. The mixture was stirred at 90°C for 4 hr. After completion of the reaction (monitored by TLC), reaction mass was directly purified by column chromatography on neutral alumina using hexane–ethyl acetate 9.5 : 0.5 as eluent to afford the desired pure product.

Compounds **4c**, **4e**, **4k**, **4m** are previously reported <sup>3</sup>.

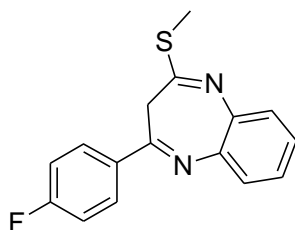

**2-(4-Fluoro-phenyl)-4-methylsulfanyl-3H-benzo[*b*][1,5]diazepine (4a).** The compound was obtained as a yellow solid, mp 95-97°C; IR ( $\nu_{\text{max}}\text{cm}^{-1}$ ) ( $\text{CHCl}_3$ ): 2924, 1599, 1584;  $^1\text{H}$  NMR (400 MHz,  $\text{CDCl}_3$ ): 8.09 (t,  $J = 8.79$  Hz, 2H), 7.49 (t,  $J = 9.52$ , 1H), 7.40 (t,

$J = 9.52$ , 1H), 7.25 (t,  $J = 6.59$ , 2H), 7.15 (t,  $J = 8.79$ , 2H), 3.38 (s, 2H), 2.47 (s, 3H);  $^{13}\text{C}$  NMR (100 MHz,  $\text{CDCl}_3$ ):  $\delta$  165.6, 163.1, 156.1, 152.8, 140.5, 139.6, 133.3, 130.2, 128.8, 127.6, 125.7, 124.5, 115.6, 39.4, 13.8; ESI-MS ( $m/z$ ): 285.41 (M+1).

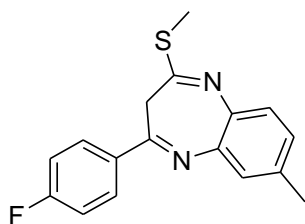

**4-(4-Fluoro-phenyl)-7-methyl-2-methylsulfanyl-3H-**

**benzo[*b*][1,5]diazepine (4b)** The compound was obtained as a yellow solid, mp 66-68°C; IR ( $\nu_{\text{max}}\text{cm}^{-1}$ ) ( $\text{CHCl}_3$ ): 2924, 1600, 1584;  $^1\text{H}$  NMR (400 MHz,  $\text{CDCl}_3$ ): 8.07 (dd,  $J = 8.79$ , 3.66, 2H), 7.29 (d,  $J = 8.05$ , 1H), 7.24 (s, 1H), 7.13 (t,  $J = 8.79$ , 2H), 7.06 (d,  $J = 8.79$ , 1H), 3.36 (s, 2H), 2.45 (s, 3H), 2.39 (s, 3H);  $^{13}\text{C}$  NMR (100 MHz,  $\text{CDCl}_3$ ):  $\delta$  165.6, 163.0, 155.3, 152.4, 139.4, 138.3, 134.4, 130.0, 128.4, 127.5, 126.9, 126.0, 115.7, 115.5, 39.4, 20.9, 13.8; ESI-MS ( $m/z$ ): 299.37 (M+1).

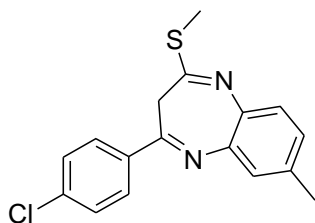

**4-(4-Chloro-phenyl)-7-methyl-2-methylsulfanyl-3H-**

**benzo[*b*][1,5]diazepine (4d)** The compound was obtained as yellow solid, mp 96-98°C; IR ( $\nu_{\text{max}}\text{cm}^{-1}$ ) ( $\text{CHCl}_3$ ): 2923, 1590;  $^1\text{H}$  NMR (400 MHz,  $\text{CDCl}_3$ ): 7.96 (d,  $J = 8.05$  Hz, 2H), 7.38 (d,  $J = 8.79$  Hz, 2H), 7.24 (d,  $J = 8.05$  Hz, 1H), 7.19 (s, 1H), 7.03 (dd,  $J = 8.05$ , 1.46, 1H), 3.31 (s, 2H), 2.40 (s, 3H), 2.35 (s, 3H);  $^{13}\text{C}$  NMR (100 MHz,  $\text{CDCl}_3$ ):  $\delta$  155.2, 152.3, 139.2, 138.4, 136.9, 134.5, 129.2, 128.8, 128.4, 127.5, 127.0, 126.1, 39.3, 20.9, 13.8; ESI-MS ( $m/z$ ): 315.37, 317.37 (M+1, M+3).

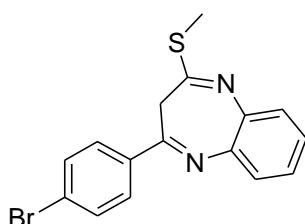

**2-(4-Bromo-phenyl)-4-methylsulfanyl-3H-benzo[*b*][1,5]diazepine (4e)**

The compound was obtained as light yellow solid, mp 92-94°C; IR ( $\nu_{\text{max}}\text{cm}^{-1}$ ) ( $\text{CHCl}_3$ ): 2924, 1586;  $^1\text{H}$  NMR (400 MHz,  $\text{CDCl}_3$ ): 7.95 (d,  $J = 8.79$  Hz, 2H), 7.59 (d,  $J = 8.05$  Hz, 2H), 7.50 (m, 1H), 7.40 (m, 1H), 7.26-7.24 (m, 2H), 3.35 (s, 2H), 2.46 (s, 3H);  $^{13}\text{C}$  NMR (100 MHz,

CDCl<sub>3</sub>):  $\delta$  156.2, 152.7, 140.5, 139.6, 135.9, 131.8, 129.5, 128.6, 127.7, 125.7, 125.5, 124.7, 39.3, 13.9; ESI-MS (*m/z*): 345.31, 347.31 (*M*+1, *M*+3).

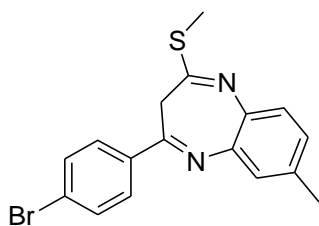

**4-(4-Bromo-phenyl)-7-methyl-2-methylsulfanyl-3H-benzo[*b*][1,5]diazepine (4f)** The compound was obtained as a light yellow solid, mp 100-102°C; IR ( $\nu_{\max}$ cm<sup>-1</sup>) (CHCl<sub>3</sub>): 2923, 1585 ; <sup>1</sup>H NMR (400 MHz, CDCl<sub>3</sub>): 7.93 (d, *J* = 8.79 Hz, 2H), 7.58 (d, *J* = 8.79 Hz, 2H), 7.28 (d, *J* = 8.05 Hz, 1H), 7.20 (s, 1H), 7.07 (dd, *J* = 8.05 Hz, 2.2, 1H), 3.34 (s, 2H), 2.45 (s, 3H), 2.39 (s, 3H); <sup>13</sup>C NMR (100 MHz, CDCl<sub>3</sub>):  $\delta$  155.2, 152.4, 139.2, 138.3, 136.0, 134.5, 131.7, 129.4, 128.4, 127.5, 127.0, 126.1, 125.4, 39.3, 20.9, 13.8; ESI-MS (*m/z*): 359.25, 361.25 (*M*+1, *M*+3).

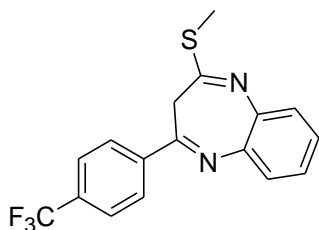

**2-Methylsulfanyl-4-(4-trifluoromethyl-phenyl)-3H-benzo[*b*][1,5]diazepine (4g)** The compound was obtained as a yellow solid, mp 96-98°C; IR ( $\nu_{\max}$ cm<sup>-1</sup>) (CHCl<sub>3</sub>): 2925, 1577, 1315 ; <sup>1</sup>H NMR (400 MHz, CDCl<sub>3</sub>): 8.19 (d, *J* = 8.05 Hz, 2H), 7.71 (d, *J* = 8.05 Hz, 2H), 7.50 (dd, *J* = 7.32, 2.93 Hz, 1H), 7.41 (dd, *J* = 7.32, 2.93 Hz, 1H), 7.28-7.25 (m, 2H), 3.4 (s, 2H), 2.47 (s, 3H); <sup>13</sup>C NMR (100 MHz, CDCl<sub>3</sub>):  $\delta$  156.1, 152.3, 140.6, 140.3, 139.4, 132.2, 131.9, 128.7, 128.1, 127.7, 126.0, 125.5, 124.7, 39.5, 13.9; ESI-MS (*m/z*): 335.34 (*M*+1).

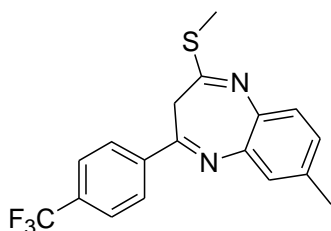

**7-Methyl-2-methylsulfanyl-4-(4-trifluoromethyl-phenyl)-3H-benzo[*b*][1,5]diazepine (4h)** The compound was obtained as a yellow viscous material, IR ( $\nu_{\max}$ cm<sup>-1</sup>) (CHCl<sub>3</sub>): 2924, 1578, 1313 ; <sup>1</sup>H NMR (400 MHz, CDCl<sub>3</sub>): 8.12 (d, *J* = 8.05 Hz, 2H), 7.65 (d, *J* = 8.05 Hz, 2H), 7.24 (d, *J* = 7.32 Hz, 1H), 7.17 (d, *J* = 7.32 Hz, 1H), 7.02 (t, *J* = 7.32 Hz,

1H), 3.32 (s, 2H), 2.40 (s, 3H), 2.35 (s, 3H);  $^{13}\text{C}$  NMR (100 MHz,  $\text{CDCl}_3$ ):  $\delta$  155.1, 151.9, 140.4, 139.2, 138.4, 137.2, 136.1, 134.6, 128.6, 128.1, 127.6, 127.4, 126.1, 125.5, 39.5, 20.9, 13.8; ESI-MS ( $m/z$ ): 349.28 (M+1).

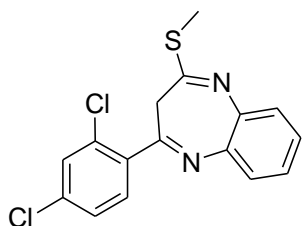

**2-(2,4-Dichloro-phenyl)-4-methylsulfanyl-3H-benzo[b][1,5]diazepine**

**(4i)** The compound was obtained as a yellow solid, mp 108-110°C; IR ( $\nu_{\text{max}}\text{cm}^{-1}$ ) ( $\text{CHCl}_3$ ): 2924, 1601, 1580;  $^1\text{H}$  NMR (400 MHz,  $\text{CDCl}_3$ ): 7.47 (dd,  $J = 7.32, 1.46$  Hz, 2H), 7.40 (dd,  $J = 7.32, 1.46$  Hz, 1H), 7.30-7.23 (m, 4H), 3.43 (s, 2H), 2.46 (s, 3H);  $^{13}\text{C}$  NMR (100 MHz,  $\text{CDCl}_3$ ):  $\delta$  156.3, 155.0, 139.9, 139.2, 136.9, 136.2, 133.4, 131.5, 129.8, 128.6, 127.5, 126.2, 124.6, 43.7, 14.0; ESI-MS ( $m/z$ ): 335.26, 337.26 (M+1, M+3).

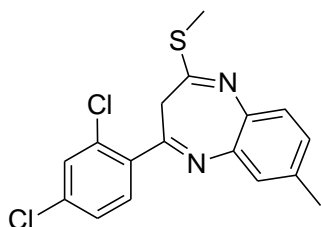

**4-(2,4-Dichloro-phenyl)-7-methyl-2-methylsulfanyl-3H-**

**benzo[b][1,5]diazepine (4j)** The compound was obtained as a yellow viscous material, IR ( $\nu_{\text{max}}\text{cm}^{-1}$ ) ( $\text{CHCl}_3$ ): 2923, 1584;  $^1\text{H}$  NMR (400 MHz,  $\text{CDCl}_3$ ): 7.47 (s, 1H), 7.37-7.20 (m, 4H), 7.11-7.04 (dddd,  $J = 8.05, 2.2$  Hz, 1H), 3.41 (s, 2H), 2.45 (s, 3H), 2.40 (s, 3H);  $^{13}\text{C}$  NMR (100 MHz,  $\text{CDCl}_3$ ):  $\delta$  155.9, 154.6, 139.7, 138.9, 137.7, 137.0, 136.1, 134.4, 133.4, 131.5, 129.8, 128.5, 127.5, 126.0, 43.6, 20.9, 13.9; ESI-MS ( $m/z$ ): 349.29, 351.29 (M+1, M+3).

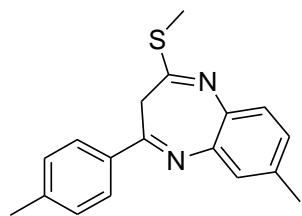

**7-Methyl-2-methylsulfanyl-4-p-tolyl-3H-benzo[b][1,5]diazepine (4l)**

The compound was obtained as a light yellow solid, mp 64-66°C; IR ( $\nu_{\text{max}}\text{cm}^{-1}$ ) ( $\text{CHCl}_3$ ): 2922, 1594, 1574;  $^1\text{H}$  NMR (400 MHz,  $\text{CDCl}_3$ ): 7.94 (d,  $J = 8.05$  Hz, 2H), 7.28-7.24 (m, 4H), 7.04 (d,  $J = 8.79$  Hz, 1H), 3.35 (s, 2H), 2.42 (s, 3H), 2.38 (s, 6H);  $^{13}\text{C}$  NMR (100 MHz,  $\text{CDCl}_3$ ):  $\delta$



156.1, 155.5, 141.1, 138.3, 134.3, 129.3, 128.4, 128.0, 127.4, 126.6, 125.9, 39.3, 21.4, 20.9, 13.8;  
ESI-MS (m/z) : 295.39 (M+1).

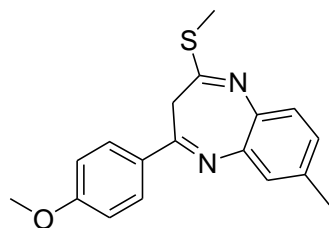

**4-(4-Methoxy-phenyl)-7-methyl-2-methylsulfanyl-3H-**

**benzo[*b*][1,5]diazepine (4n)** The compound was obtained as a off white solid, mp 92-94°C; IR ( $\nu_{\max}$ cm<sup>-1</sup>) (CHCl<sub>3</sub>): 2923, 1593 ; <sup>1</sup>H NMR (400 MHz, CDCl<sub>3</sub>): 8.05 (d, *J* = 8.05 Hz, 2H), 7.36-7.20 (m, 2H), 7.06 (d, *J* = 8.05 Hz, 1H), 6.97 (d, *J* = 8.79 Hz, 2H), 3.85 (s, 3H), 3.37 (s, 2H), 2.43 (s, 3H), 2.39 (s, 3H); <sup>13</sup>C NMR (100 MHz, CDCl<sub>3</sub>):  $\delta$  161.9, 155.5, 138.4, 134.4, 130.0, 128.3, 127.3, 126.6, 126.0, 114.0, 55.4, 39.2, 20.8, 13.8; ESI-MS (m/z) : 311.41 (M+1).

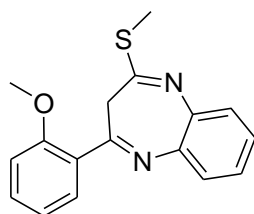

**2-(2-Methoxy-phenyl)-4-methylsulfanyl-3H-benzo[*b*][1,5]diazepine (4o)**

The compound was obtained as a yellow viscous material, IR ( $\nu_{\max}$ cm<sup>-1</sup>) (CHCl<sub>3</sub>): 2924, 1597, 754 ; <sup>1</sup>H NMR (400 MHz, CDCl<sub>3</sub>): 7.57 (d, *J* = 6.59 Hz, 1H), 7.44 (d, *J* = 8.05 Hz, 2H), 7.39 (dd, *J* = 8.05, 2.2 Hz, 1H), 7.27 (dd, *J* = 7.32, 2.2 Hz, 1H), 7.21 (dt, *J* = 7.32, 2.2 Hz, 1H), 6.98 (d, *J* = 8.05 Hz, 2H), 3.92 (s, 3H), 3.51 (s, 2H), 2.45 (s, 3H); <sup>13</sup>C NMR (100 MHz, CDCl<sub>3</sub>):  $\delta$  158.1, 140.3, 131.7, 131.3, 128.7, 127.5, 125.6, 124.5, 120.9, 111.1, 55.3, 43.0, 14.0; ESI-MS (m/z) : 297.37 (M+1).

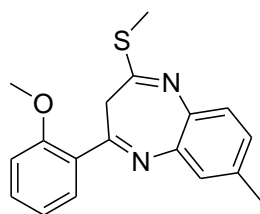

**4-(2-Methoxy-phenyl)-7-methyl-2-methylsulfanyl-3H-**

**benzo[*b*][1,5]diazepine (4p)** The compound was obtained as a yellow viscous material, IR ( $\nu_{\max}$ cm<sup>-1</sup>) (CHCl<sub>3</sub>): 2923, 1599, 753 ; <sup>1</sup>H NMR (400 MHz, CDCl<sub>3</sub>): 7.40 (t, *J* = 8.05 Hz, 2H), 7.33-7.19 (m, 2H), 7.05 (t, *J* = 8.79 Hz, 1H), 6.97 (t, *J* = 7.32 Hz, 2H), 3.9 (s, 3H), 3.46 (s, 2H), 2.43 (s, 3H), 2.38 (s, 3H); <sup>13</sup>C NMR (100 MHz, CDCl<sub>3</sub>):  $\delta$  158.1, 157.7, 157.0, 140.0, 138.0, 134.1,

131.5, 131.2, 128.7, 127.3, 126.8, 125.7, 120.8, 111.0, 55.3, 43.0, 20.9, 13.9; ESI-MS (m/z) : 311.36 (M+1).

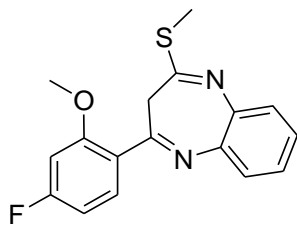

**2-(4-Fluoro-2-methoxyphenyl)-4-methylsulfanyl-3H-benzo[b][1,5]diazepine (4q)** The compound was obtained as a off white solid, mp 128-130°C; IR ( $\nu_{\max}$ cm<sup>-1</sup>) (CHCl<sub>3</sub>): 2923, 1596 ; <sup>1</sup>H NMR (400 MHz, CDCl<sub>3</sub>): 7.51 (d, *J* = 7.32 Hz, 1H), 7.44 (t, *J* = 8.05 Hz, 1H), 7.38 (dd, *J* = 7.32, 2.2 Hz, 1H), 7.27-7.19 (m, 2H), 6.71-6.66 (m, 2H), 3.91 (s, 3H), 3.47 (s, 2H), 2.45 (s, 3H); <sup>13</sup>C NMR (100 MHz, CDCl<sub>3</sub>):  $\delta$  166.2, 163.7, 159.5, 157.8, 156.3, 140.2, 132.9, 128.7, 127.5, 125.6, 124.4, 107.6, 99.4, 55.7, 42.9, 14.0; ESI-MS (m/z) : 315.34 (M+1).

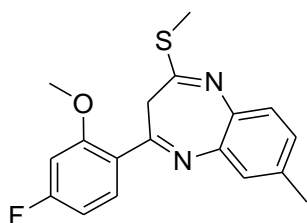

**4-(4-Fluoro-2-methoxyphenyl)-7-methyl-2-methylsulfanyl-3H-benzo[b][1,5]diazepine (4r)** The compound was obtained as a light yellow solid, mp 76-78°C; IR ( $\nu_{\max}$ cm<sup>-1</sup>) (CHCl<sub>3</sub>): 2924, 1596 ; <sup>1</sup>H NMR (400 MHz, CDCl<sub>3</sub>): 7.38-7.31 (m, 1H), 7.22-7.13 (m, 2H), 7.01-6.96 (m, 1H), 6.63-6.58 (m, 2H), 3.81 (s, 3H), 3.39 (s, 2H), 2.37 (s, 3H), 2.32 (s, 3H); <sup>13</sup>C NMR (100 MHz, CDCl<sub>3</sub>):  $\delta$  166.2, 163.7, 159.6, 157.4, 156.8, 140.0, 138.0, 135.6, 134.2, 132.7, 128.6, 127.3, 126.9, 125.8, 124.3, 107.6, 99.4, 55.6, 42.8, 20.9, 13.9; ESI-MS (m/z) : 329.35 (M+1).

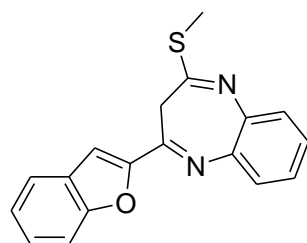

**2-Benzofuran-2-yl-4-methylsulfanyl-3H-benzo[b][1,5]diazepine (4s)** The compound was obtained as a fluorescent yellow solid, mp 109-111°C; IR ( $\nu_{\max}$ cm<sup>-1</sup>) (CHCl<sub>3</sub>): 2923, 1592, 751 ; <sup>1</sup>H NMR (400 MHz, CDCl<sub>3</sub>): 7.62 (d, *J* = 7.32 Hz, 1H), 7.56-7.53 (m, 2H), 7.39-7.32 (m, 3H), 7.23-7.19 (m, 3H), 3.33 (s, 2H), 2.40 (s, 3H); <sup>13</sup>C NMR (100 MHz,

CDCl<sub>3</sub>):  $\delta$  156.4, 156.0, 152.4, 144.9, 140.5, 139.2, 129.0, 127.7, 126.9, 125.9, 124.7, 123.5, 122.2, 112.1, 110.9, 39.5, 13.8; ESI-MS (*m/z*): 307.54 (*M*+1).

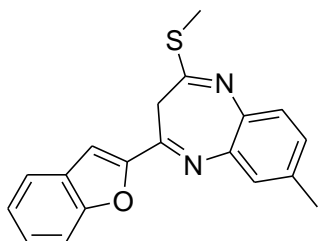

**2-Benzofuran-2-yl-7-methyl-4-methylsulfanyl-3H-benzo[*b*][1,5]diazepine (4t)** The compound was obtained as a yellow solid, mp 119-121 °C; IR ( $\nu_{\max}$ cm<sup>-1</sup>) (CHCl<sub>3</sub>): 2923, 1592, 751 ; <sup>1</sup>H NMR (400 MHz, CDCl<sub>3</sub>): 7.61 (d, *J* = 8.05 Hz, 1H), 7.55 (d, *J* = 8.79 Hz, 1H), 7.37-7.31 (m, 2H), 7.25-7.16 (m, 3H), 7.03 (dd, *J* = 8.05, 1.46 Hz, 1H), 3.31 (s, 2H), 2.39 (s, 3H), 2.35 (s, 3H); <sup>13</sup>C NMR (100 MHz, CDCl<sub>3</sub>):  $\delta$  156.0, 155.4, 152.5, 144.5, 140.5, 139.0, 138.5, 134.5, 128.9, 127.9, 127.6, 127.3, 126.9, 126.1, 123.5, 122.2, 112.1, 110.7, 39.5, 20.9, 13.9; ESI-MS (*m/z*): 321.55 (*M*+1).

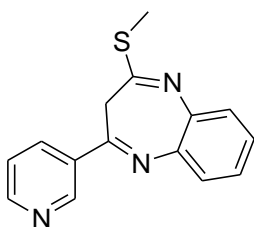

**2-Methylsulfanyl-4-pyridin-3-yl-3H-benzo[*b*][1,5]diazepine (4u)** The compound was obtained as a yellow viscous material, IR ( $\nu_{\max}$ cm<sup>-1</sup>) (CHCl<sub>3</sub>): 2923, 2852, 1598, 1574 ; <sup>1</sup>H NMR (400 MHz, DMSO-*d*<sub>6</sub>): 9.28 (s, 1H), 8.71 (dd, *J* = 5.13, 2.2, 1H), 8.46 (dd, *J* = 8.05, 2.2, 1H), 7.55 (q, *J* = 8.05 Hz, 1H), 7.46 (dd, *J* = 7.32, 2.2, 1H), 7.36 (dd, *J* = 7.32, 2.2, 1H), 7.33-7.26 (m, 2H), 3.56 (s, 2H), 2.40 (s, 3H); <sup>13</sup>C NMR (100 MHz, DMSO-*d*<sub>6</sub>):  $\delta$  157.5, 152.8, 152.0, 149.7, 140.6, 139.8, 136.0, 132.3, 129.1, 128.0, 126.5, 125.3, 124.3, 39.5, 13.9; ESI-MS (*m/z*): 268.56 (*M*+1).

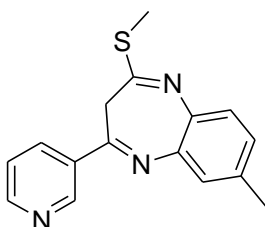

**7-Methyl-2-methylsulfanyl-4-pyridin-3-yl-3H-benzo[*b*][1,5]diazepine (4v)** The compound was obtained as a peach coloured solid, mp 86-88 °C; IR ( $\nu_{\max}$ cm<sup>-1</sup>) (CHCl<sub>3</sub>): 2923, 1596, 1576 ; <sup>1</sup>H NMR (400 MHz, DMSO-*d*<sub>6</sub>): 9.23 (t, *J* = 2.2 Hz, 1H), 8.67 (td, *J* = 5.13, 1.46 Hz, 1H), 8.41 (dd, *J* = 8.05, 2.2 Hz, 1H), 7.51 (q, *J* = 8.05 Hz, 1H), 7.33-7.22 (m,

2H), 7.08 (td,  $J = 8.79, 2.2$  Hz, 1H), 3.50 (s, 2H), 2.36 (s, 3H), 2.33 (s, 3H);  $^{13}\text{C}$  NMR (100 MHz, DMSO- $d_6$ ):  $\delta$  156.3, 152.2, 151.7, 149.4, 140.3, 139.4, 138.3, 135.7, 134.4, 132.2, 128.6, 127.7, 124.1, 39.5, 20.9, 13.7; ESI-MS ( $m/z$ ): 282.56 (M+1).

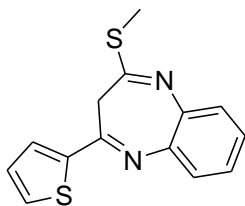

**2-Methylsulfanyl-4-thiophen-2-yl-3H-benzo[*b*][1,5]diazepine (4w)** The

compound was obtained as a fluorescent yellow solid, mp 142-144°C; IR ( $\nu_{\text{max}}\text{cm}^{-1}$ ) ( $\text{CHCl}_3$ ): 2923, 1588, 712;  $^1\text{H}$  NMR (400 MHz,  $\text{CDCl}_3$ ): 7.65 (s, 1H), 7.49 (t, 2H), 7.40-7.38 (m, 1H), 7.25-7.22 (m, 2H), 7.12 (t, 1H), 3.35 (s, 2H), 2.46 (s, 3H);  $^{13}\text{C}$  NMR (100 MHz,  $\text{CDCl}_3$ ):  $\delta$  156.5, 148.8, 143.7, 140.8, 139.4, 131.7, 129.5, 128.7, 128.0, 127.8, 125.6, 124.8, 40.3, 14.0; ESI-MS ( $m/z$ ): 273.52 (M+1).

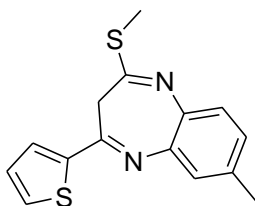

**7-Methyl-2-methylsulfanyl-4-thiophen-2-yl-3H-benzo[*b*][1,5]diazepine (4x)** The

compound was obtained as a yellow viscous material, IR ( $\nu_{\text{max}}\text{cm}^{-1}$ ) ( $\text{CHCl}_3$ ): 2923, 1588, 710;  $^1\text{H}$  NMR (400 MHz, DMSO- $d_6$ ): 7.91 (td,  $J = 5.13, 1.46$ , 1H), 7.78 (t,  $J = 5.13$ , 1H), 7.24-7.14 (m, 3H), 7.06 (td,  $J = 8.05, 2.2$ , 1H), 3.47 (s, 2H), 2.38 (s, 3H), 2.34 (s, 3H);  $^{13}\text{C}$  NMR (100 MHz, DMSO- $d_6$ ):  $\delta$  157.5, 156.9, 143.7, 140.6, 139.4, 138.6, 133.2, 131.7, 128.9, 128.6, 128.0, 127.1, 126.5, 39.5, 21.0, 13.9; ESI-MS ( $m/z$ ): 287.50 (M+1).

## X-Ray crystallographic data

The crystals of **4c** of suitable quality were obtained from dichloromethane. The compound **4c** crystallized in Monoclinic crystal system with space group P 21/c. The single-crystal Xray data were collected on an Oxford XCalibur CCD diffractometer using graphite monochromated Mo K $\alpha$  radiation ( $\lambda = 0.71073$  Å). The structures was solved using SIR- 92 and refined by full matrix least square technique on F2 using the SHELXL-97<sup>4-5</sup> program within the WinGX v 1.80.05 software package. In **4c** hydrogens are mixed and all non-hydrogen atoms were refined anisotropically. Atomic coordinates, bond lengths, bond angles,

and thermal parameters for compounds **4c** has been deposited at the Cambridge Crystallographic Data Centre. CCDC deposit number for **4c** is 920827.

The main crystallographic data and structural refinement details for **4c** are given in table 1.

**Table 1.** Crystallographic data and structural refinement parameters for compound **4c**

|                                      | <b>4c</b>                                          |
|--------------------------------------|----------------------------------------------------|
| Empirical formula                    | C <sub>16</sub> H <sub>13</sub> ClN <sub>2</sub> S |
| Formula weight                       | 300.79                                             |
| Temperature (K)                      | 298(2) K                                           |
| Wavelength [Å]                       | 0.71073                                            |
| Crystal System                       | Monoclinic                                         |
| Space Group                          | P 21/c                                             |
| a [Å]                                | 4.2750(4)                                          |
| b [Å]                                | 19.7528(15)                                        |
| c [Å]                                | 17.138(2)                                          |
| α [°]                                | 90°                                                |
| β [°]                                | 92.163(9)°                                         |
| γ [°]                                | 90°                                                |
| V [Å <sup>3</sup> ]                  | 1446.1(3)                                          |
| Z, D calcd [Mg/m <sup>3</sup> ]      | 4, 1.382                                           |
| Abs. coefficient [mm <sup>-1</sup> ] | 0.399                                              |
| F [000]                              | 624                                                |
| Crystal size [mm <sup>3</sup> ]      | 0.18 x 0.14 x 0.12                                 |
| Theta range for data collection [°]  | 3.15 to 25.00                                      |
| Index ranges                         | -5 ≤ h ≤ 5, -23 ≤ k ≤ 23, -14 ≤ l ≤ 19             |
| Reflections collected                | 7718                                               |
| Independent reflections              | 2419 [R(int) = 0.0234]                             |
| Completeness to theta = 25.00°       | 99.8 %                                             |
| Absorption correction                | Semi-empirical from equivalents                    |
| Max. and min. transmission           | 0.9537 and 0.9317                                  |
| Refinement method                    | Full-matrix least-squares on F <sup>2</sup>        |

|                                                   |                                  |
|---------------------------------------------------|----------------------------------|
| Data / restraints / parameters                    | 2419 / 0 / 182                   |
| Goodness-of-fit on $F^2$                          | 1.076                            |
| Final R indices [ $I > 2\sigma(I)$ ]              | $R_1 = 0.0457$ , $wR_2 = 0.1045$ |
| R indices (all data)                              | $R_1 = 0.0566$ , $wR_2 = 0.1102$ |
| Largest diff. peak and hole [ $\text{\AA}^{-3}$ ] | 0.185 and -0.194 e               |

## References

1. K.T. Potts, P.A. Winslow, *Synthesis*, 1987, 839.
2. M. Lubbe, R. Klassen, T. Trabhardt, A. Villinger, P. Langer, *Synlett*, 2008, **15**, 2331.
3. Z.F. Li, Y.M. Zhang, *Chinese Journal of Chemistry*, 2001, **19**, 996.
4. G.M. Sheldrick, *Acta Crystallogr., Sect. A*, 1990, **46**, 467.
5. G.M. Sheldrick, *SHELXL-97, Computer program for crystal structure refinement*.  
University of Göttingen, Germany, 1997.

## **COPIES OF $^1\text{H}$ NMR & $^{13}\text{C}$ NMR DATA**

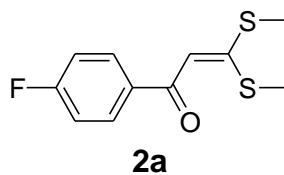

**<sup>1</sup>H NMR**

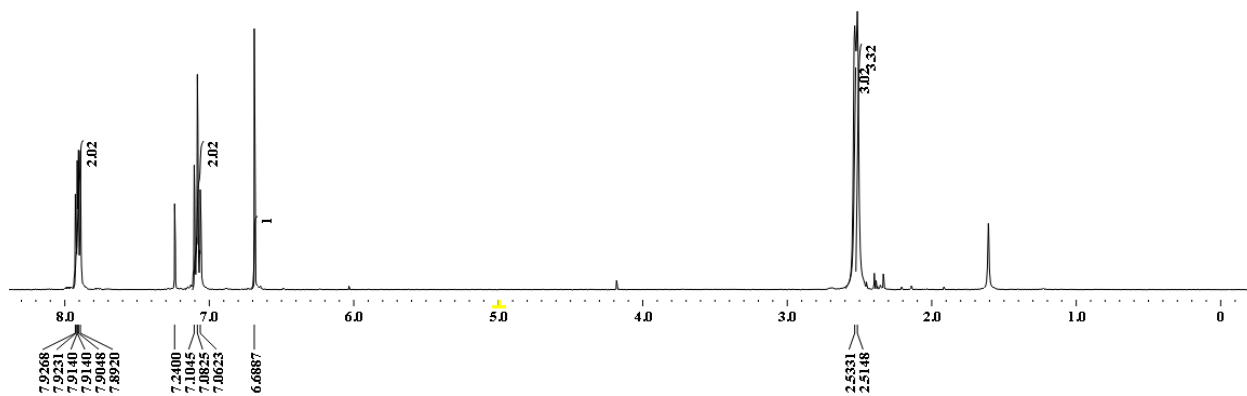



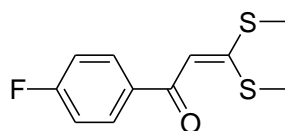

**2a**

<sup>13</sup>C NMR

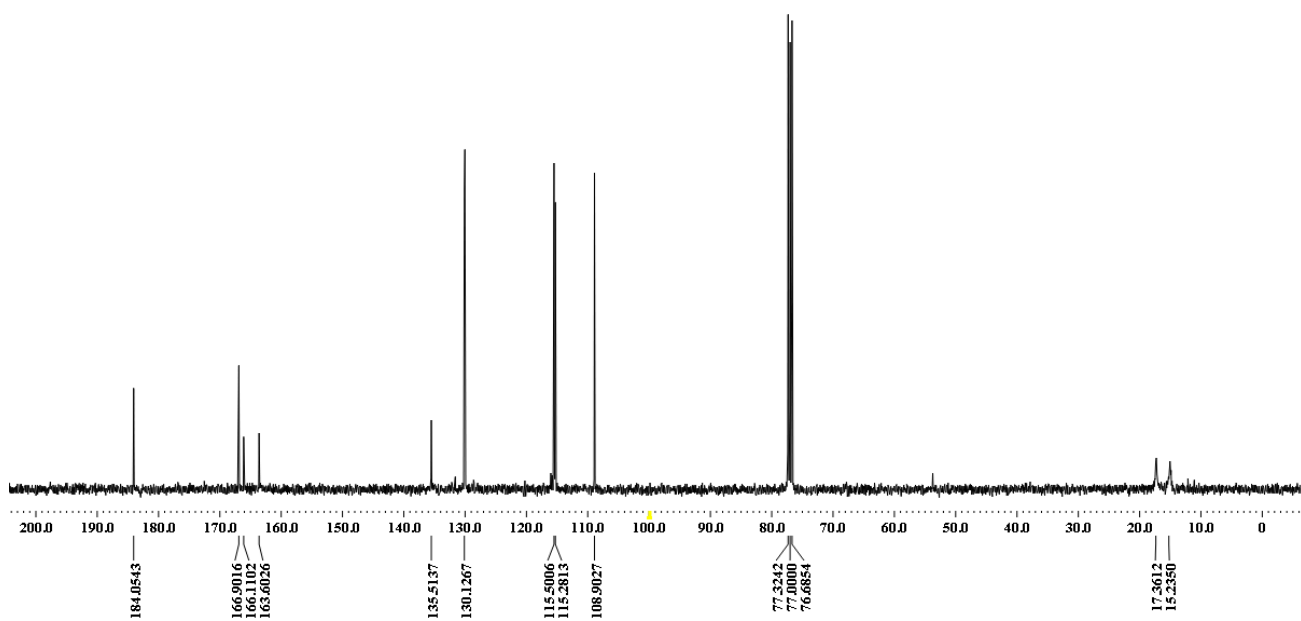

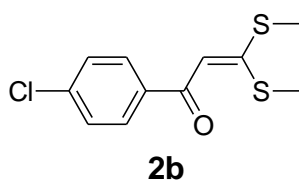

**<sup>1</sup>H NMR**

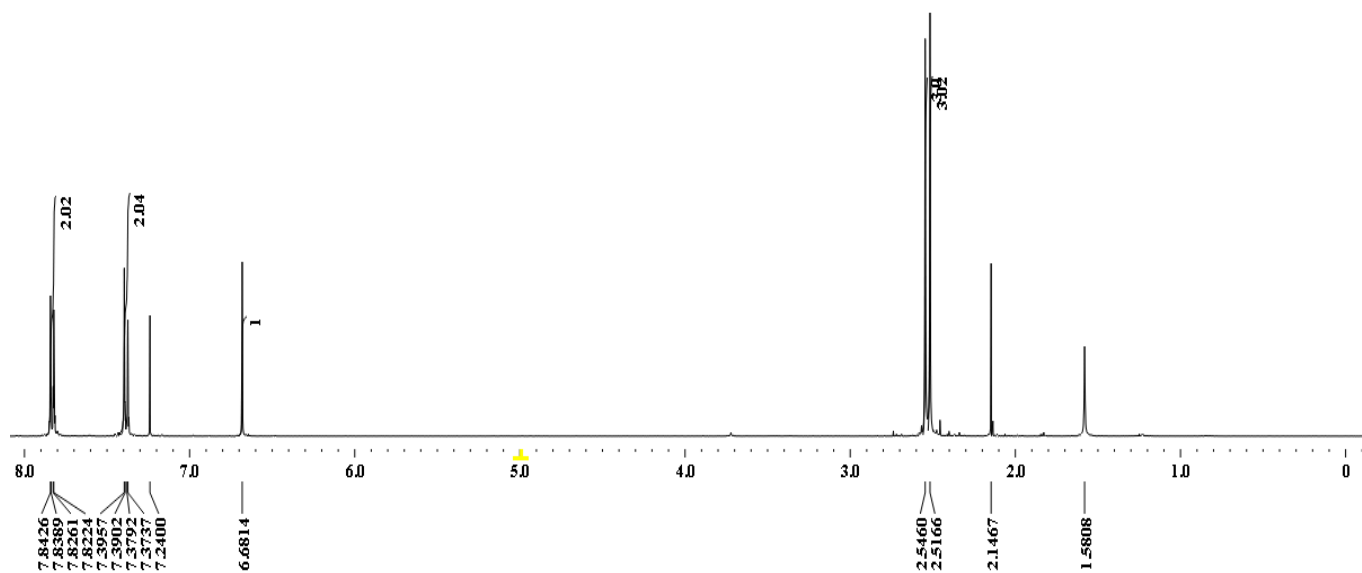

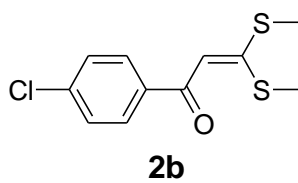

**<sup>13</sup>C NMR**

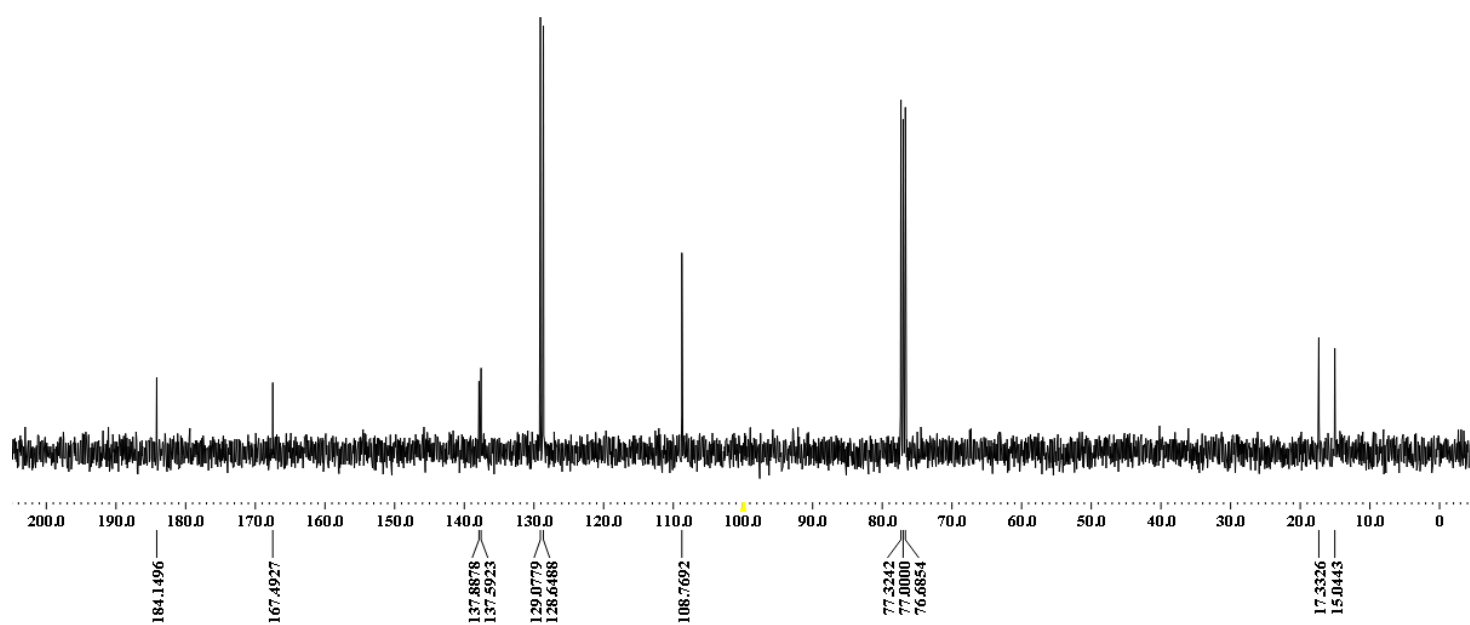

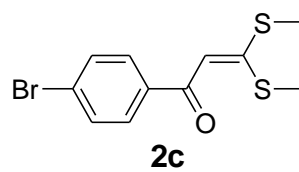

### <sup>1</sup>H NMR

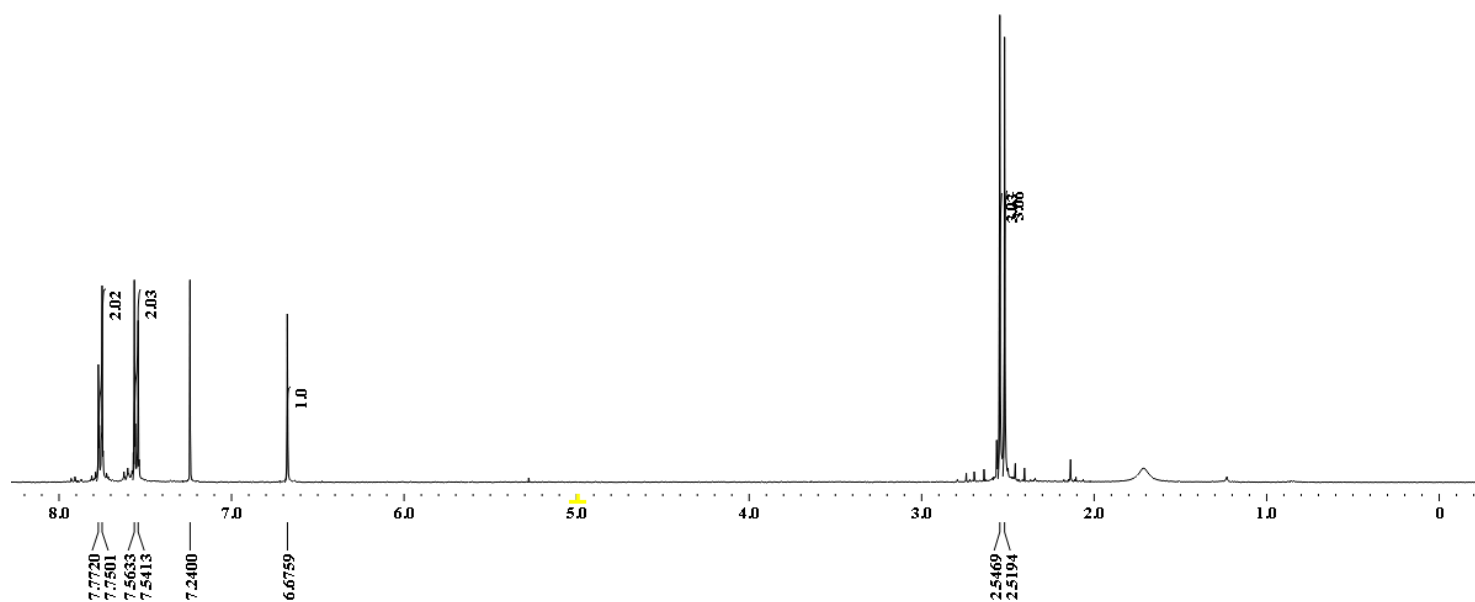

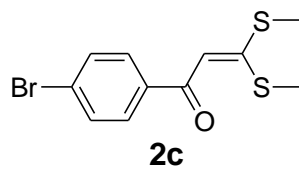

<sup>13</sup>C NMR

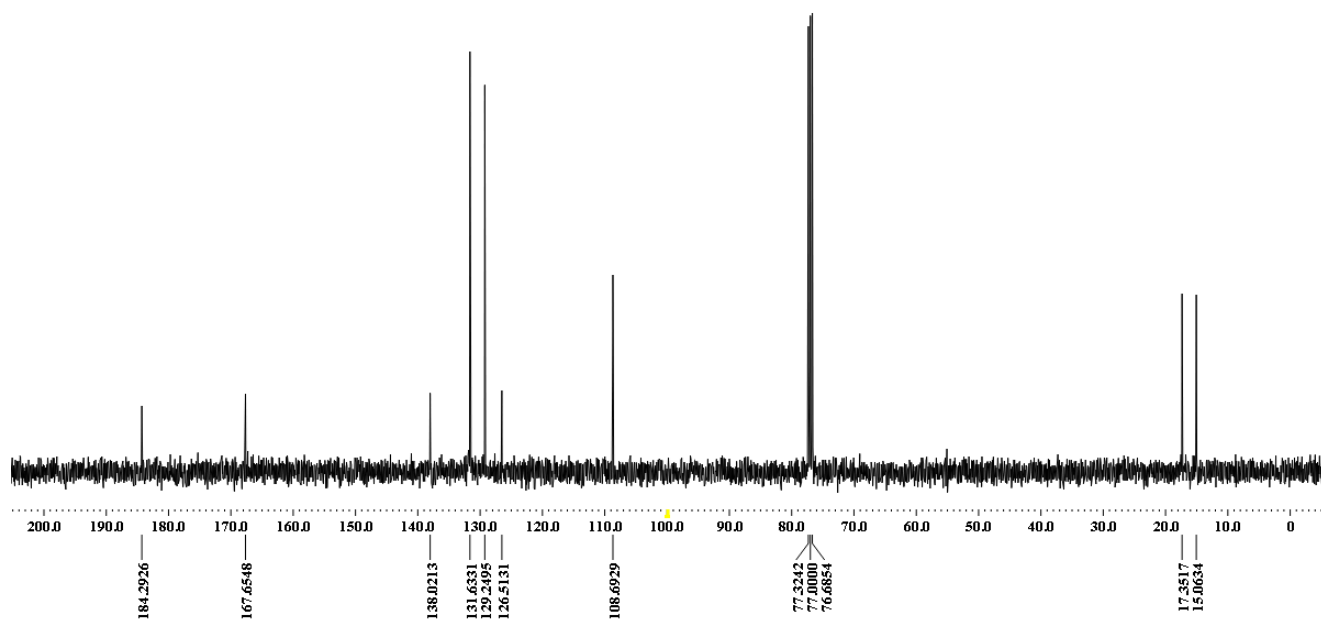

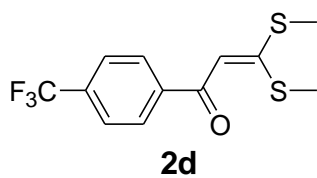

**<sup>1</sup>H NMR**

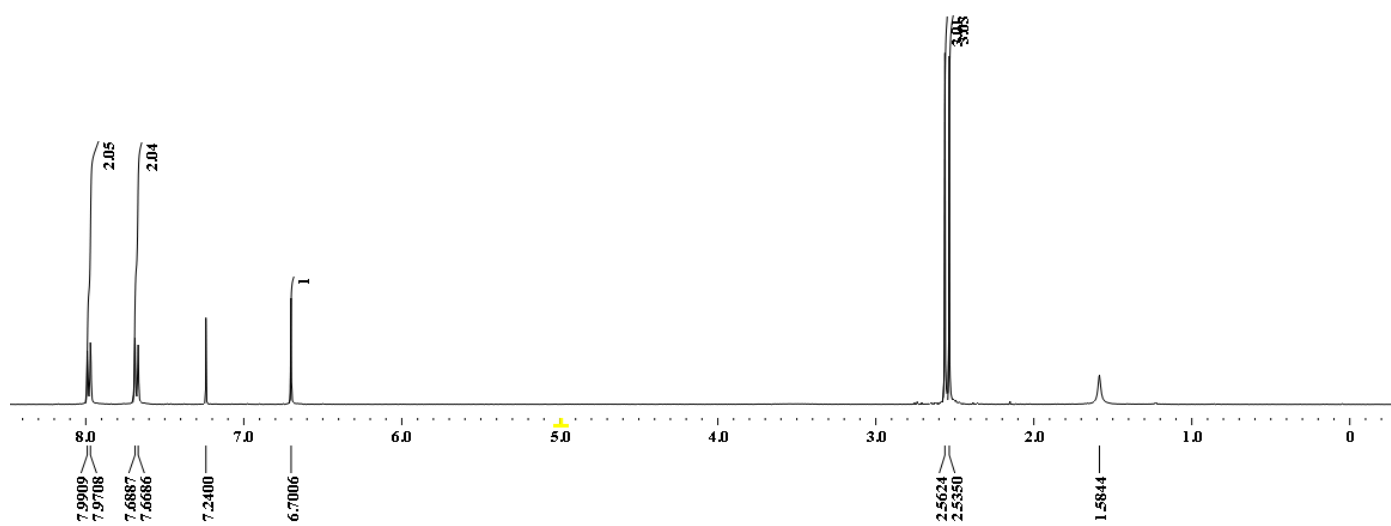

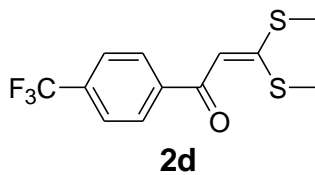

<sup>13</sup>C NMR

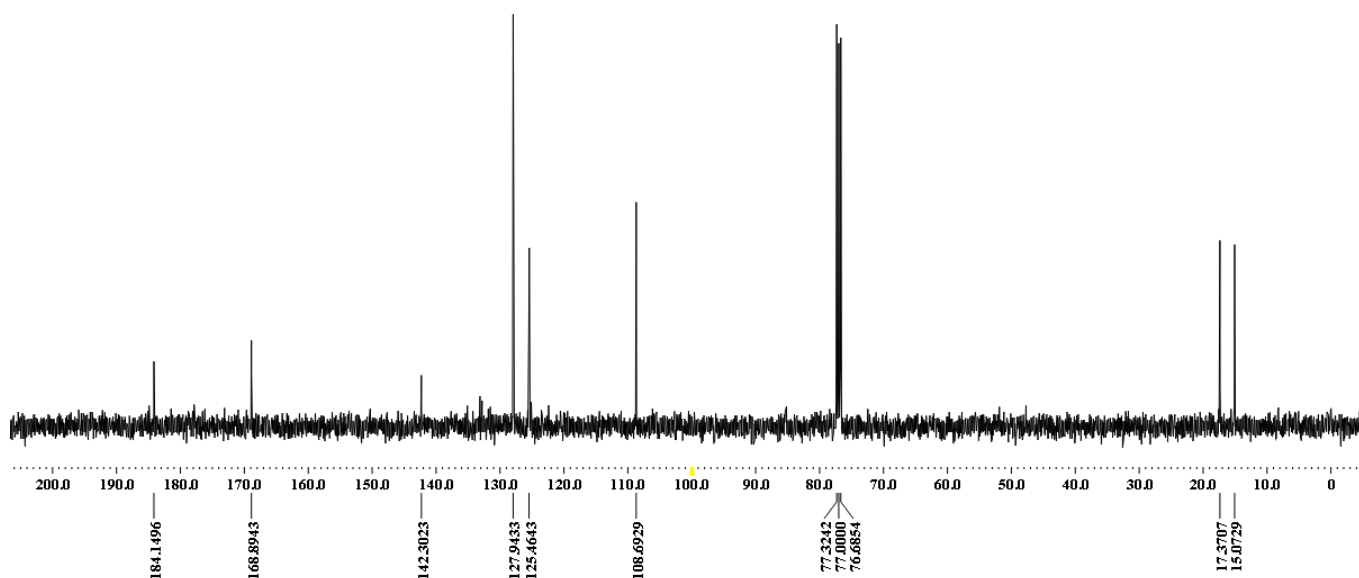

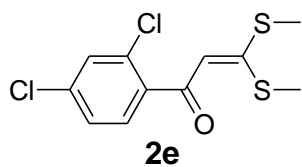

**<sup>1</sup>H NMR**

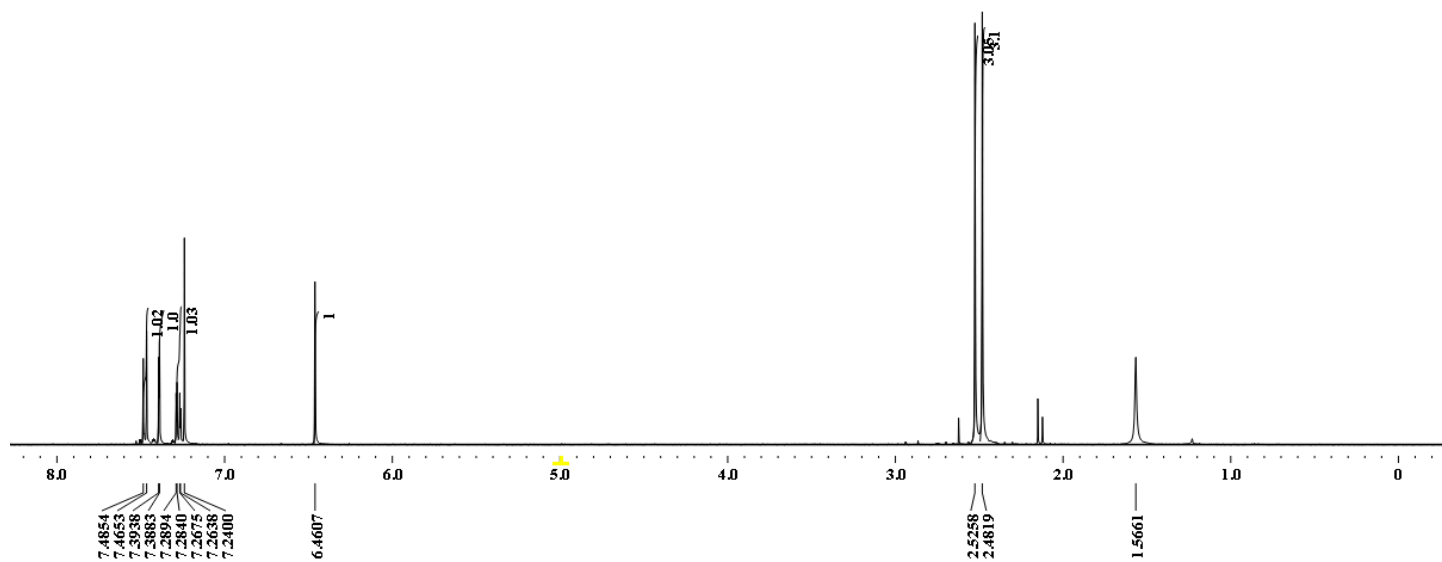



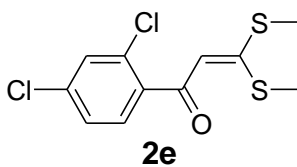

**$^{13}\text{C}$  NMR**

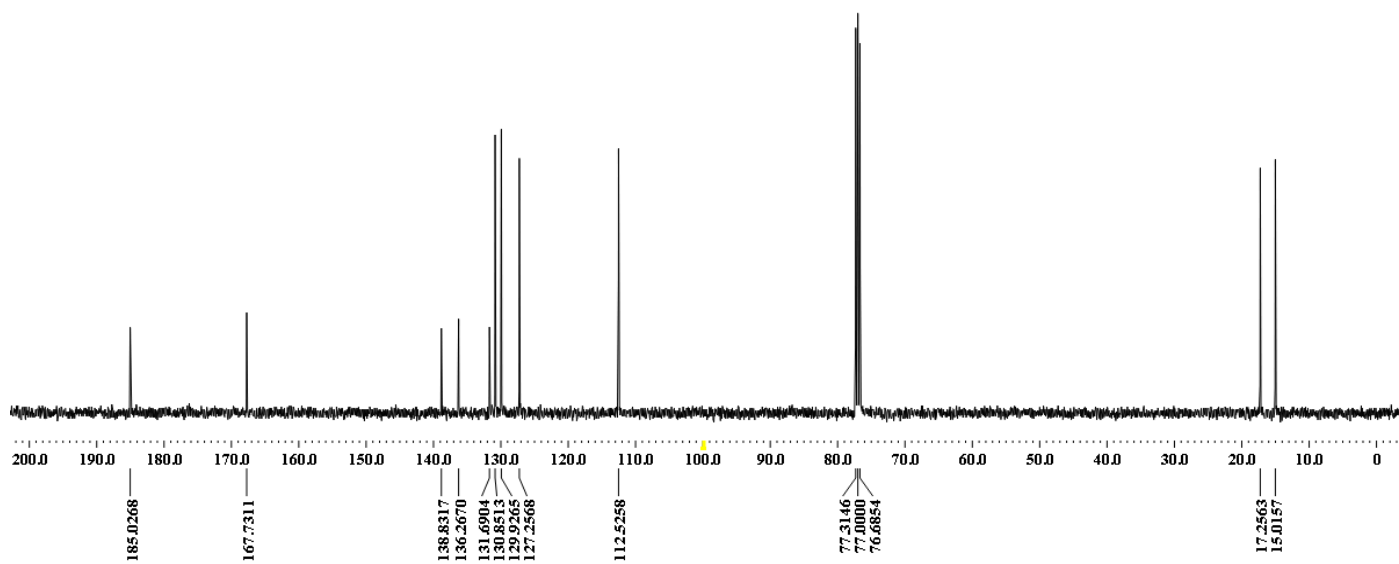

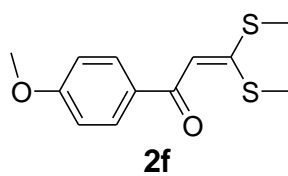

### <sup>1</sup>H NMR

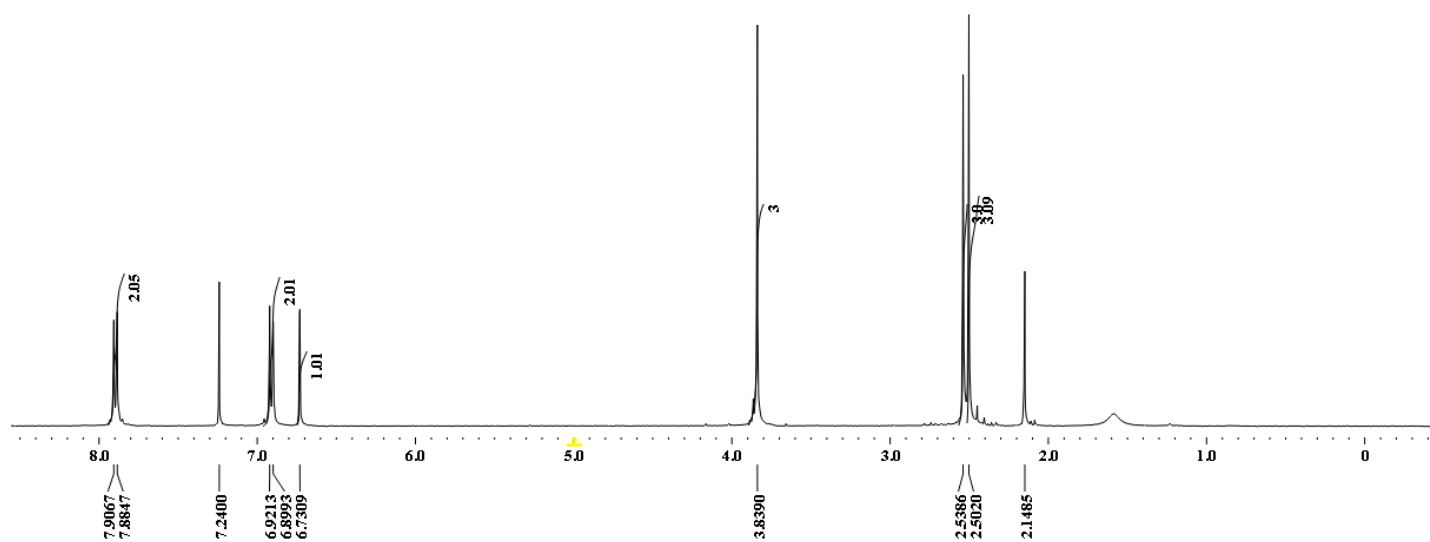

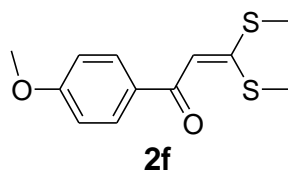

<sup>13</sup>C NMR

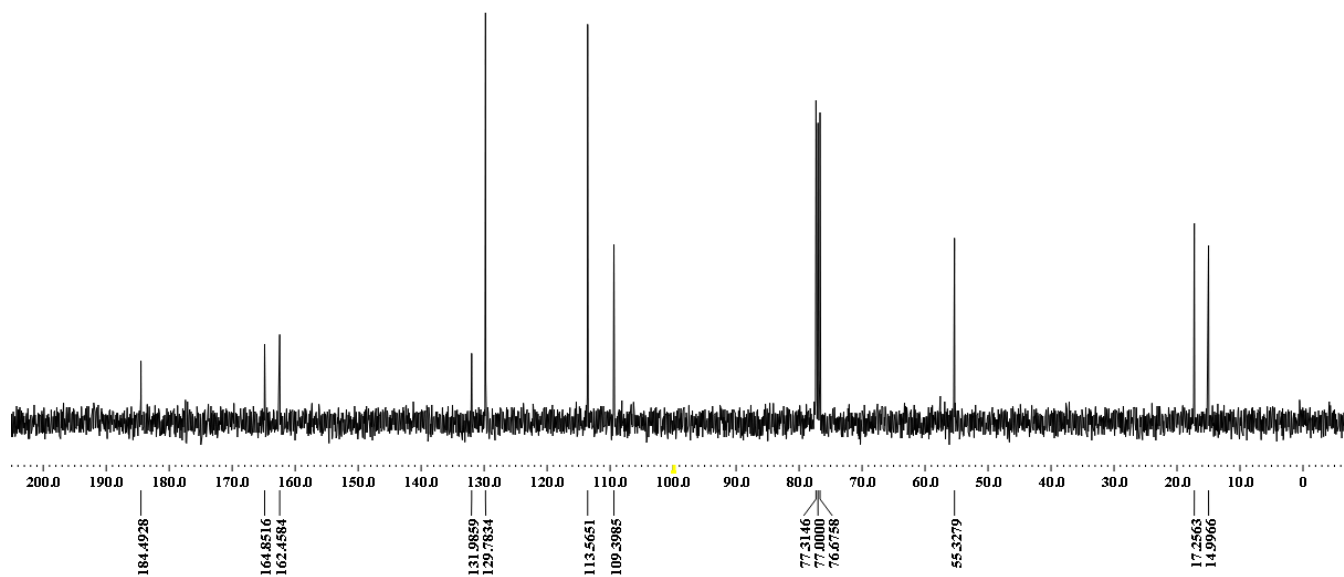

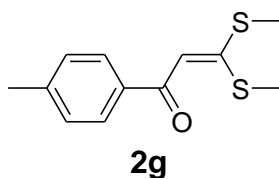

**<sup>1</sup>H NMR**

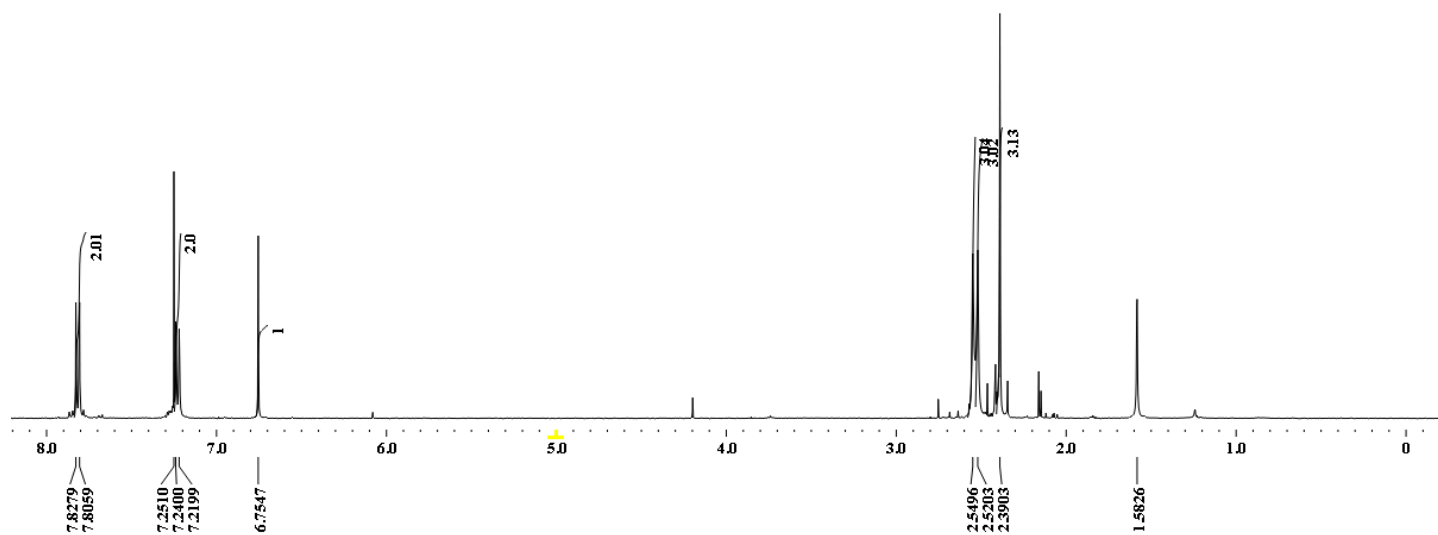

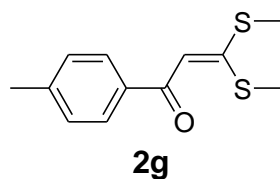

**<sup>13</sup>C NMR**

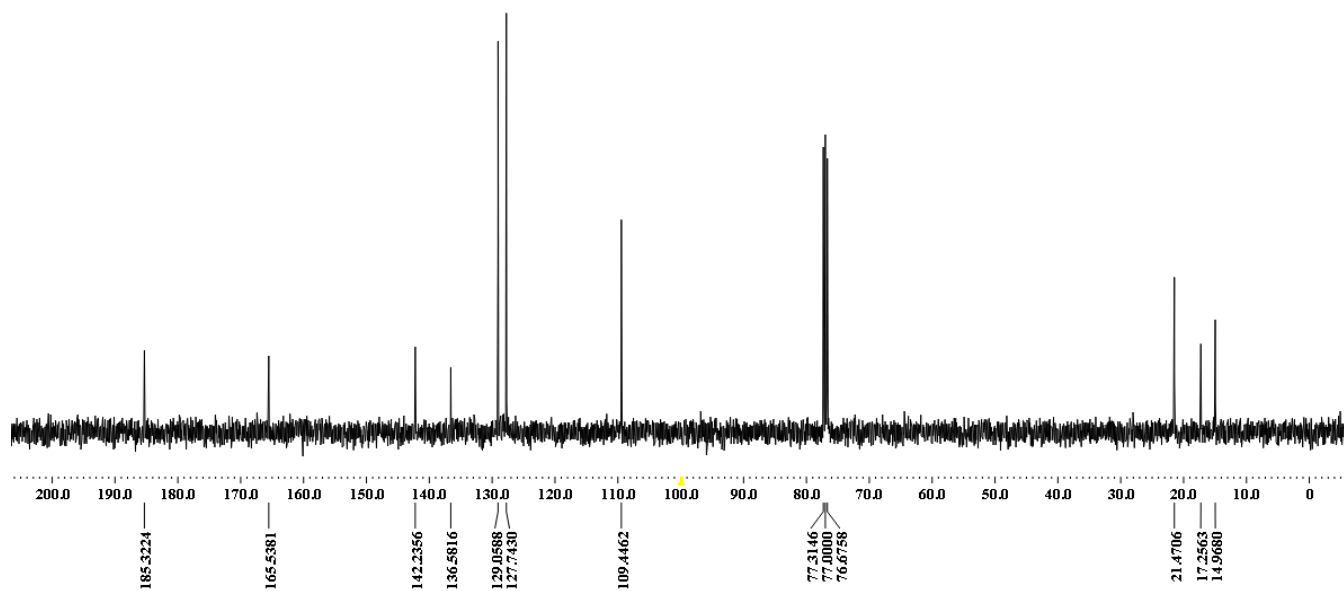

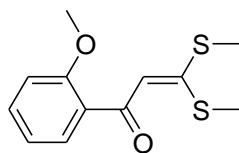

2h

<sup>1</sup>H NMR

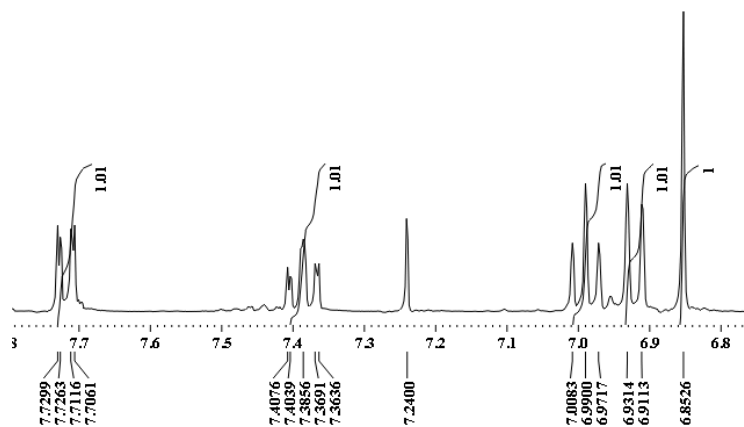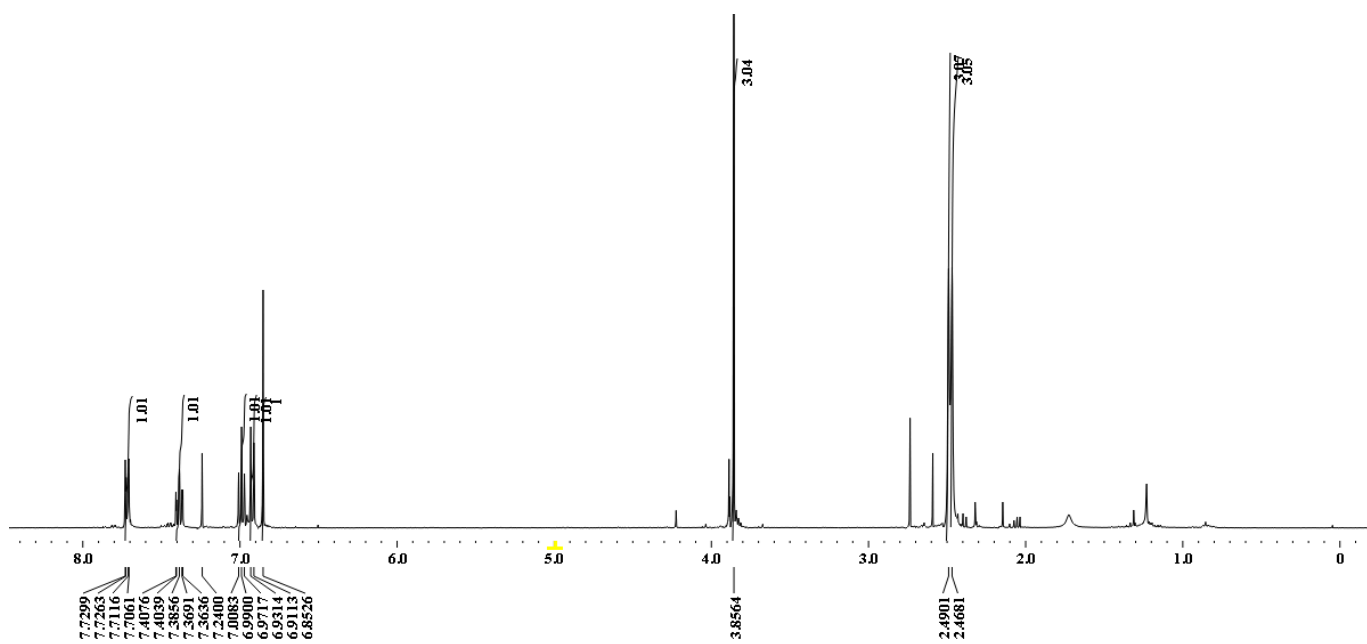

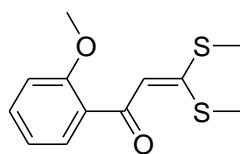

**2h**

<sup>13</sup>C NMR

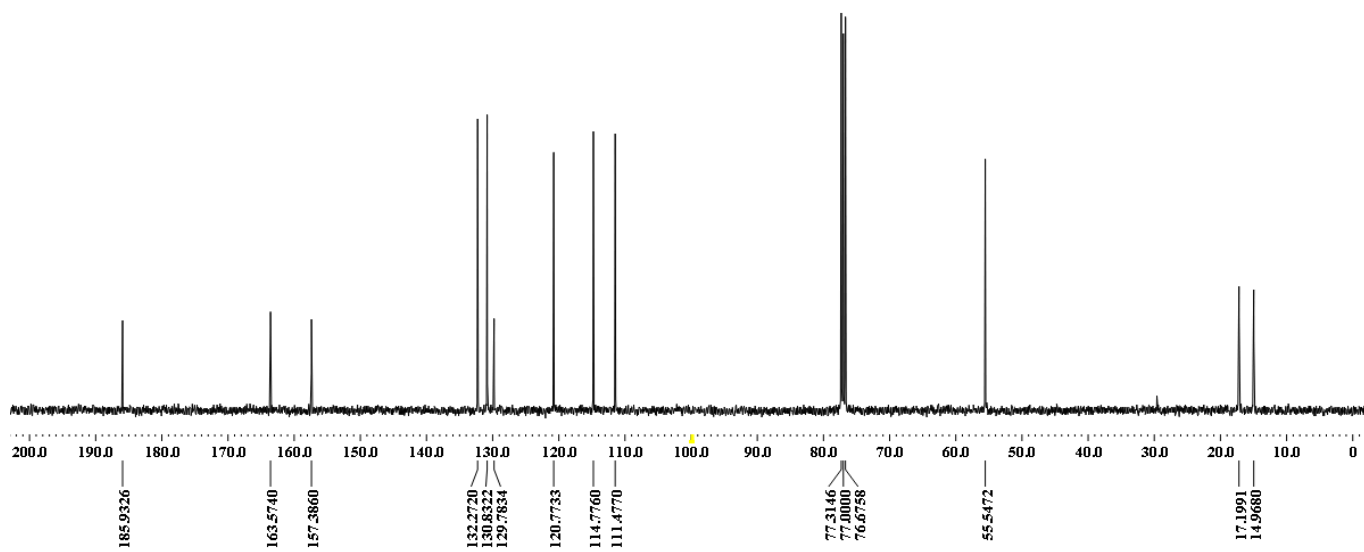

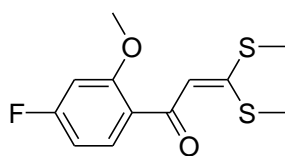

2i

<sup>1</sup>H NMR

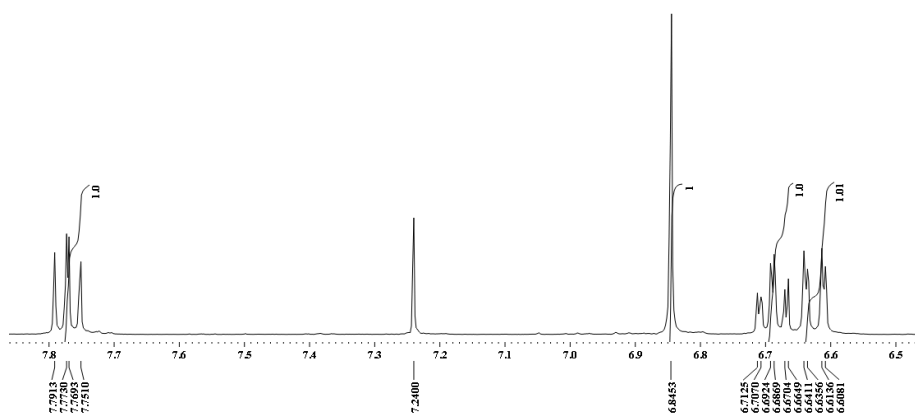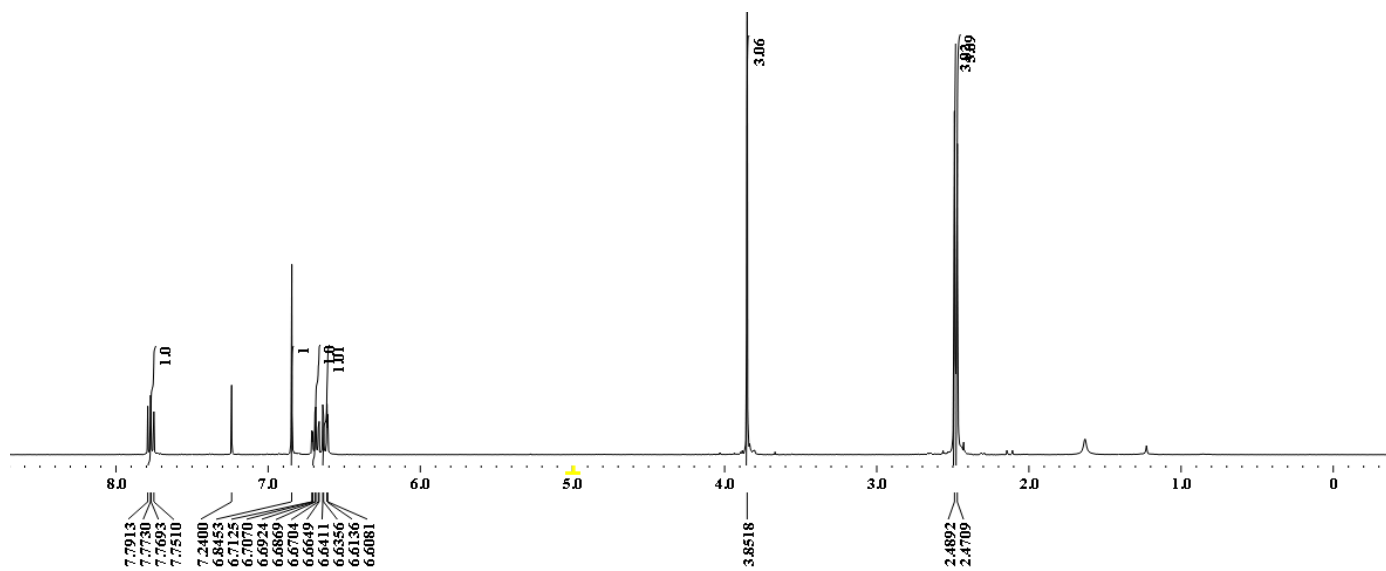



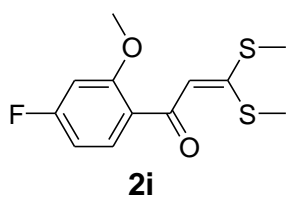

**<sup>13</sup>C NMR**

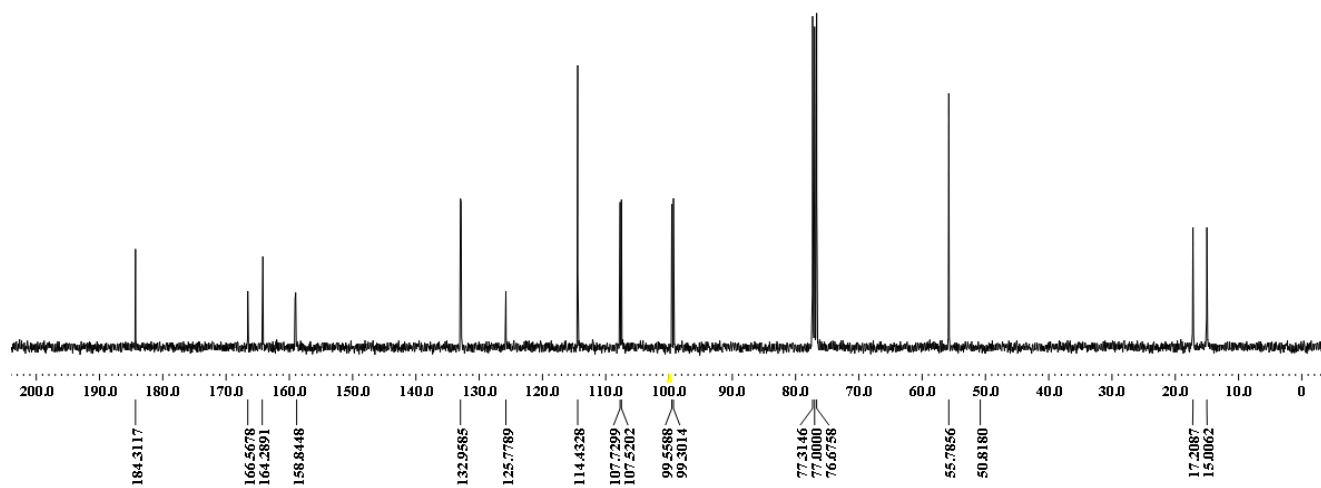

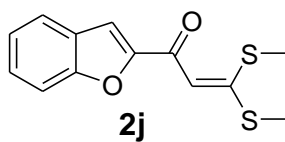

### <sup>1</sup>H NMR

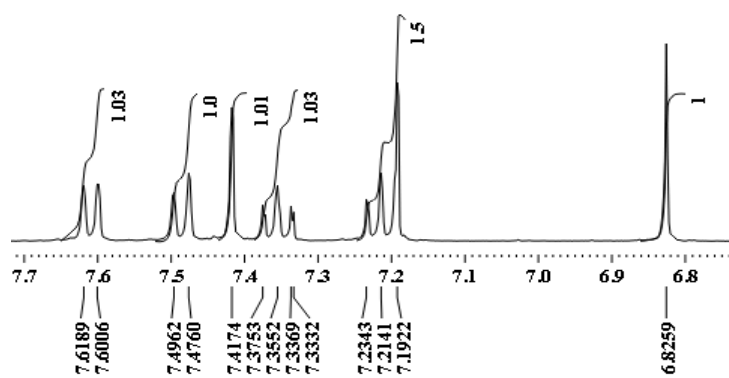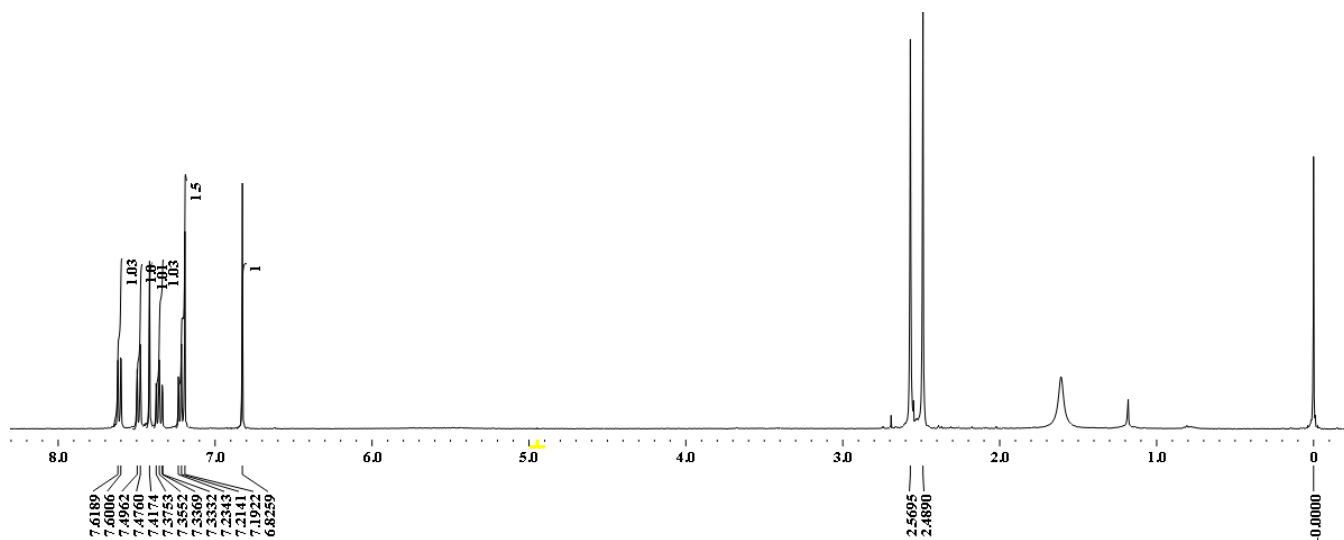

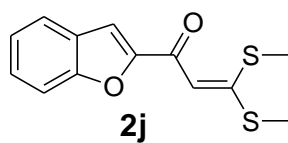

<sup>13</sup>C NMR

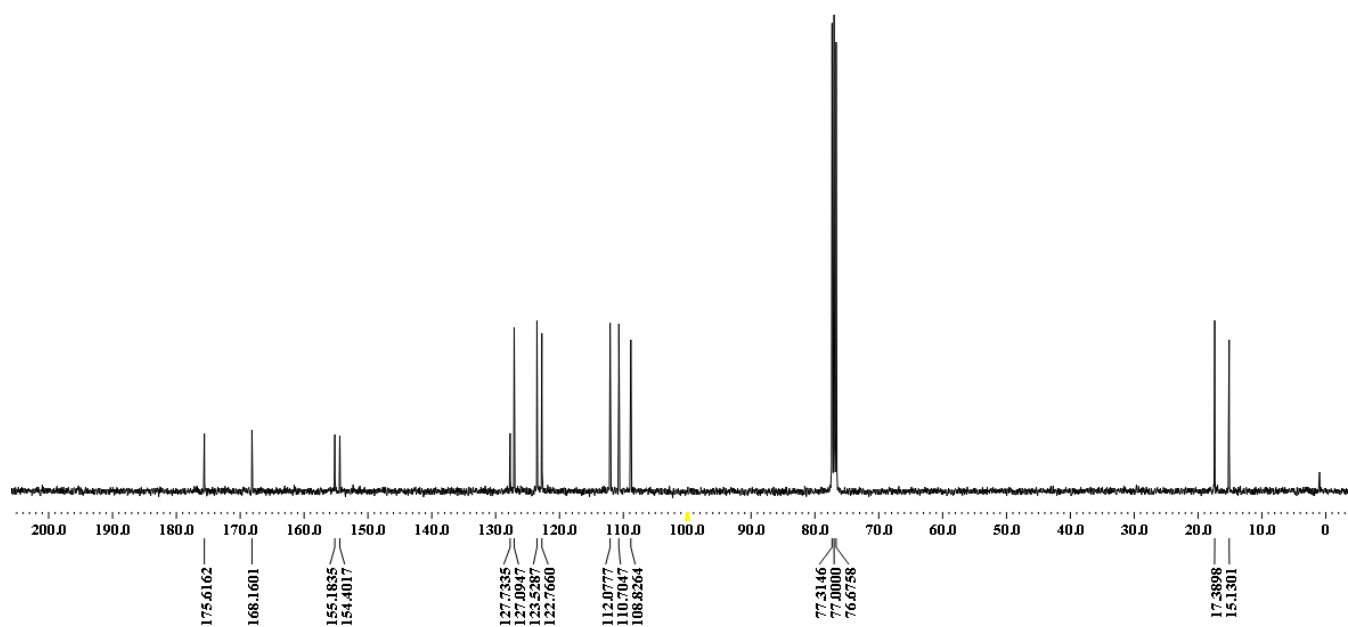

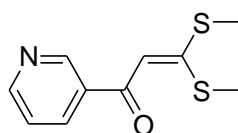

**2k**

**<sup>1</sup>H NMR**

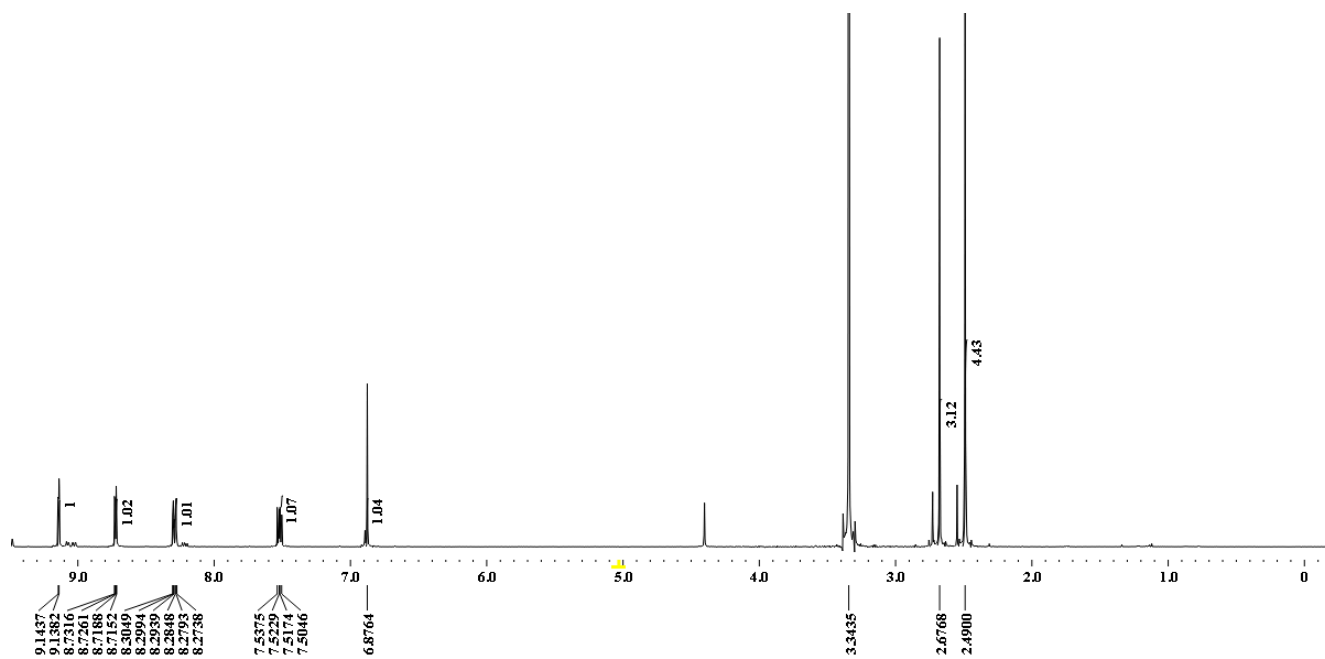

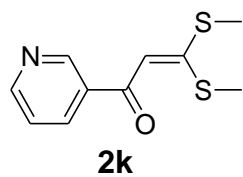

<sup>13</sup>C NMR

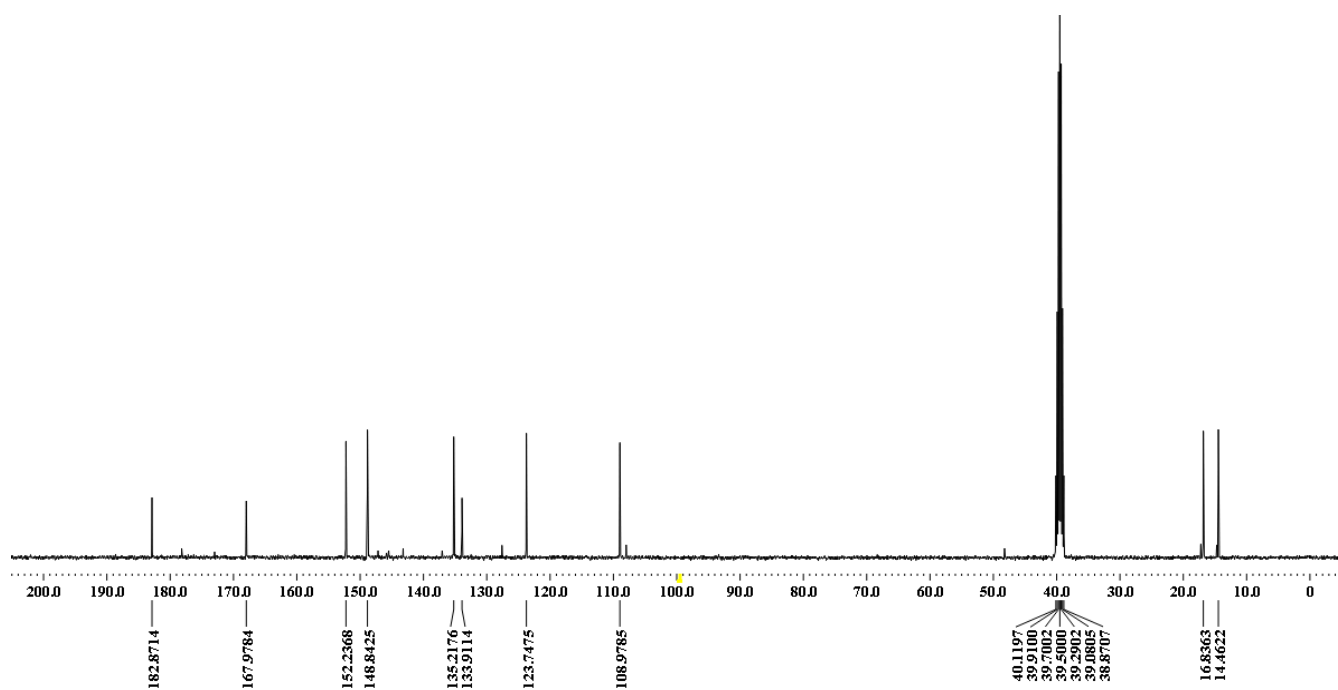

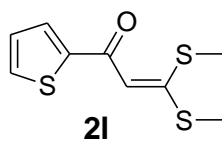

### <sup>1</sup>H NMR

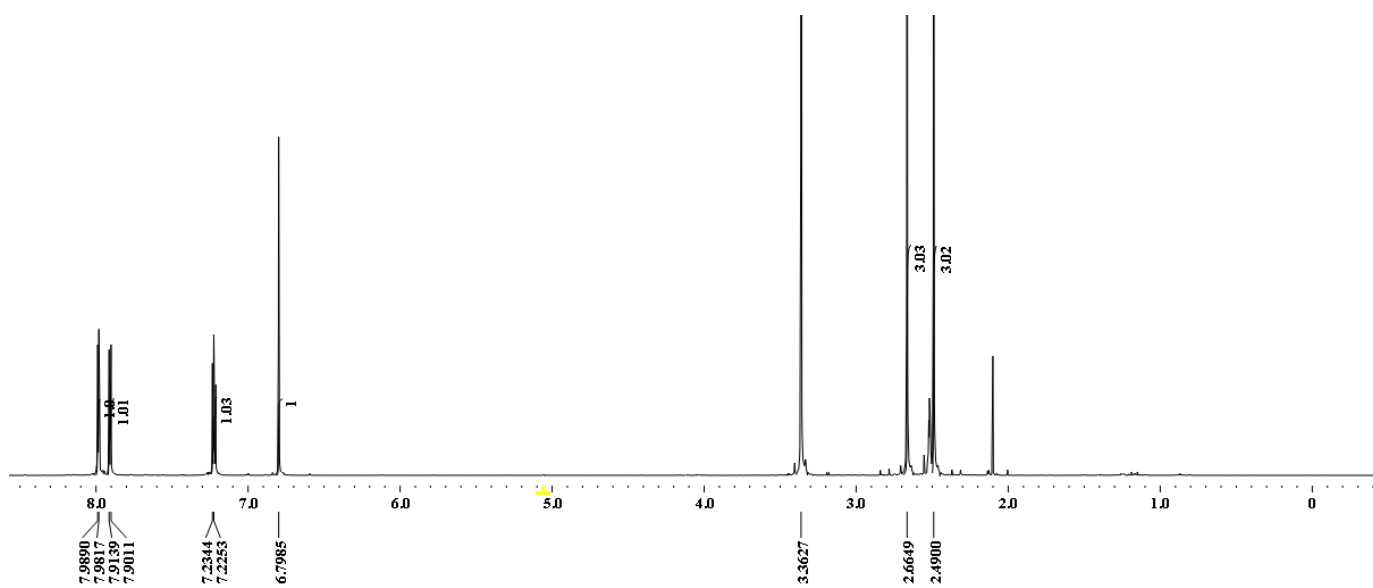

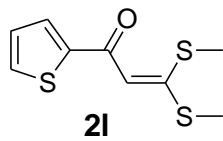

**<sup>13</sup>C NMR**

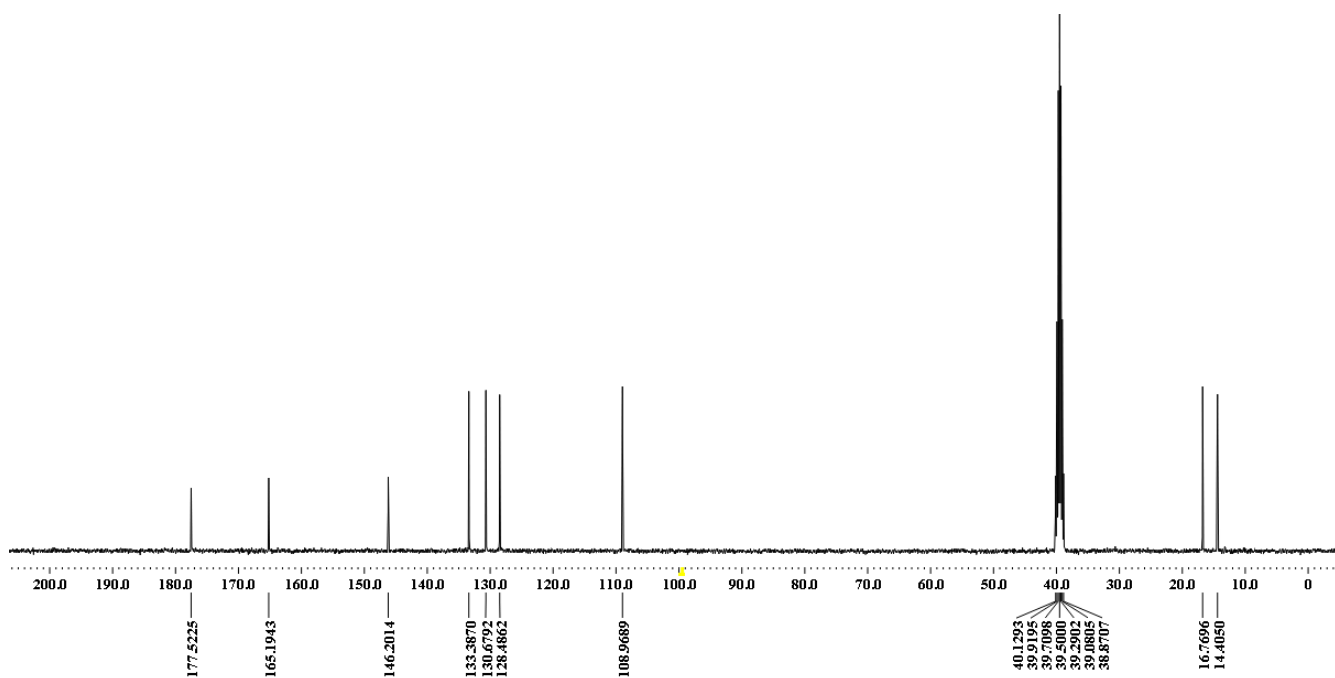

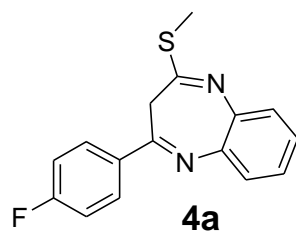

### <sup>1</sup>H NMR

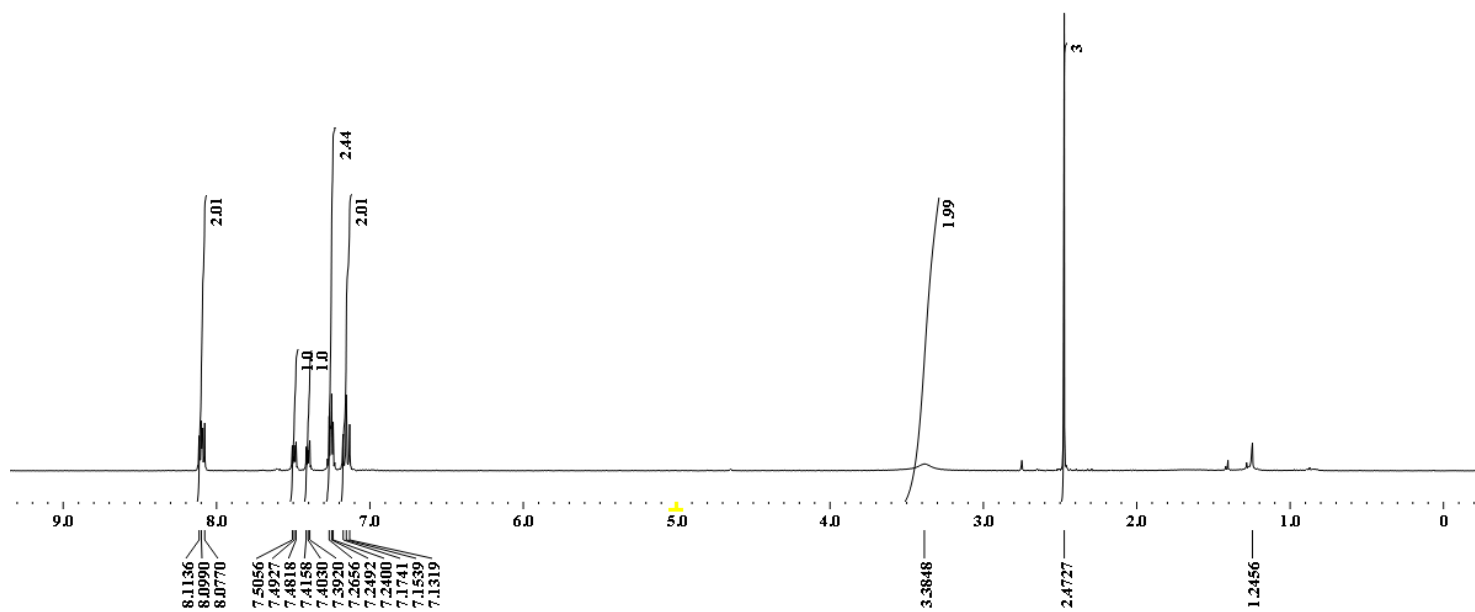



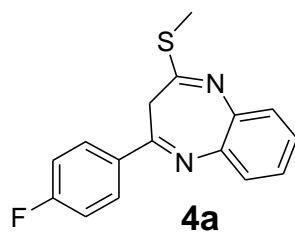

**<sup>13</sup>C NMR**

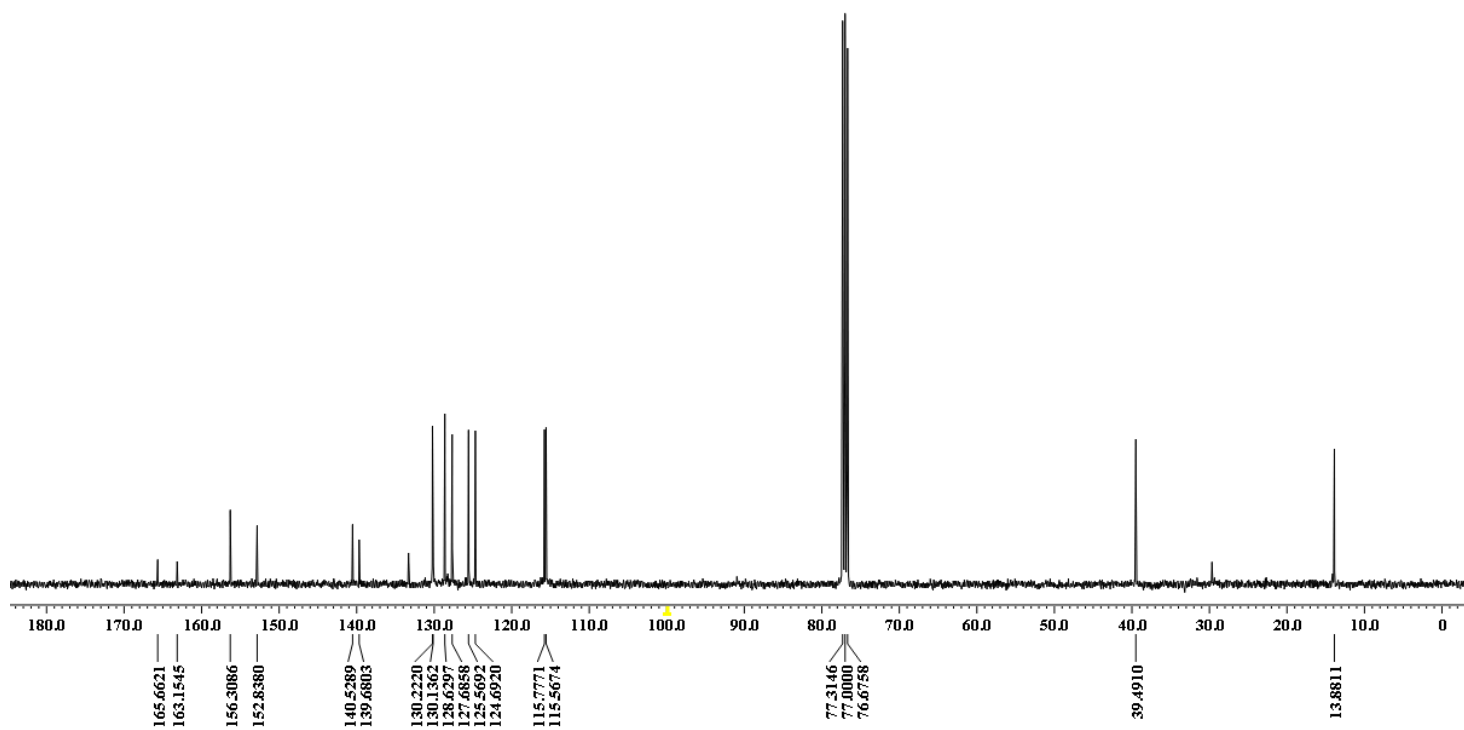

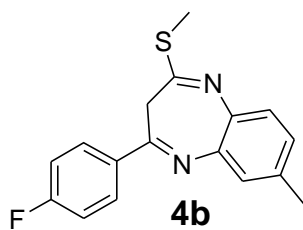

### $^1\text{H}$ NMR

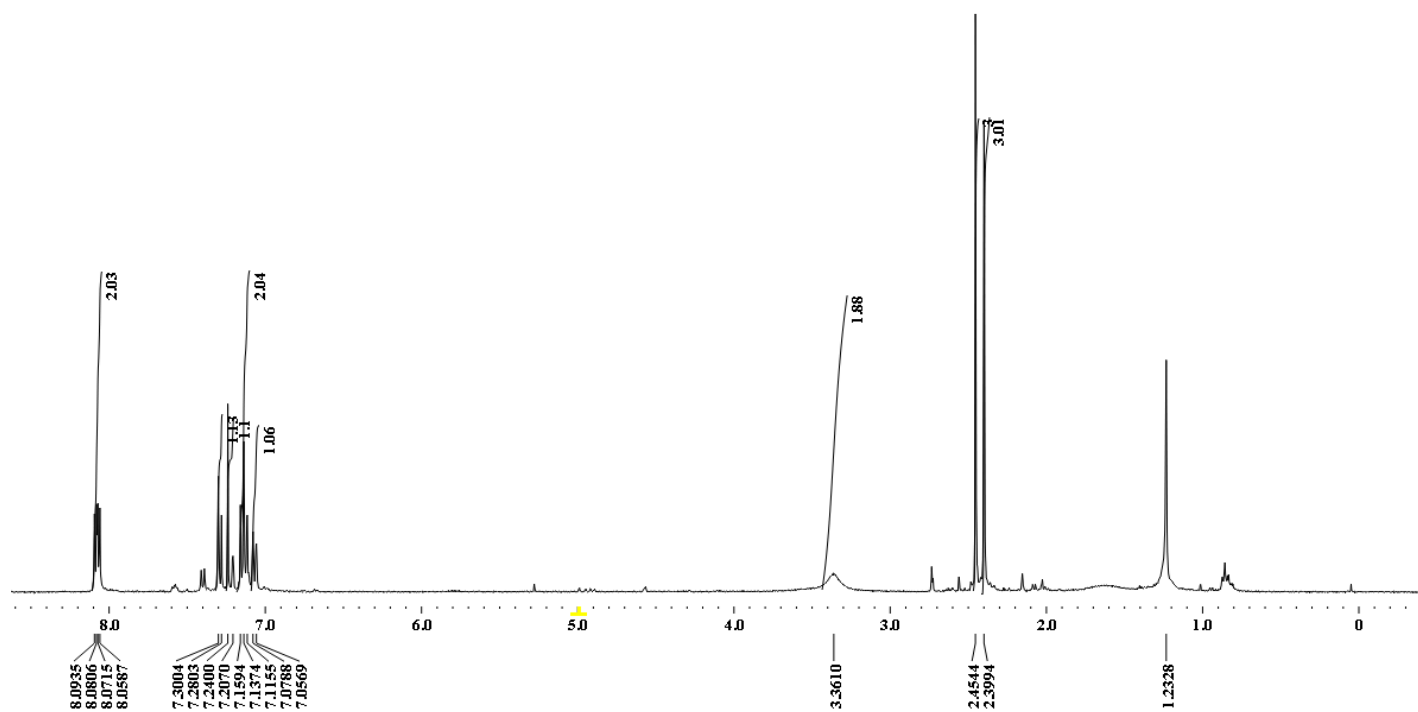

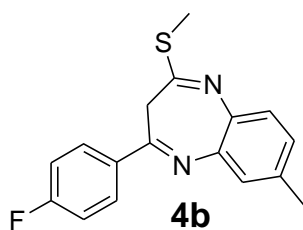

<sup>13</sup>C NMR

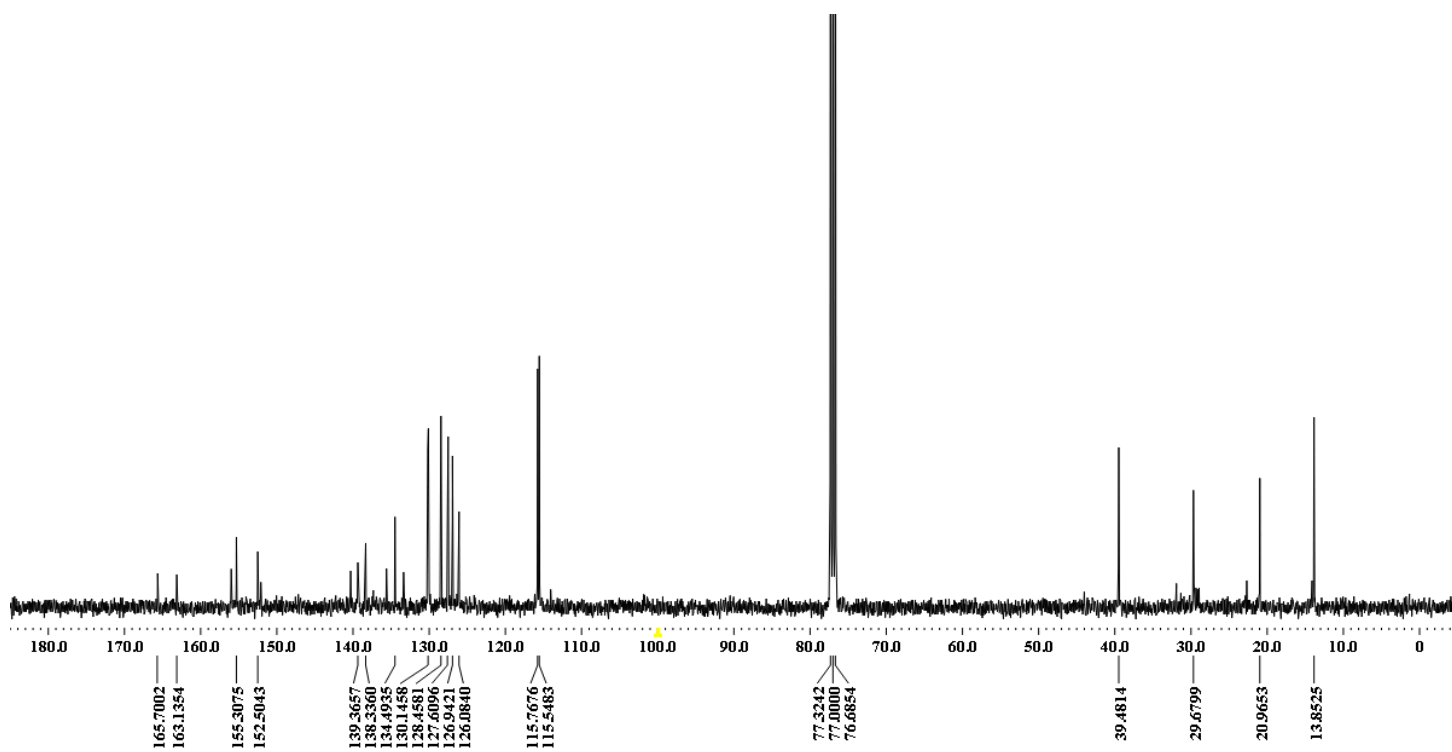

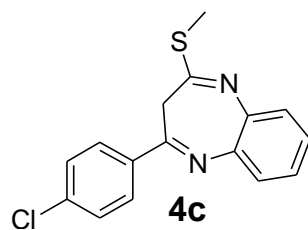

**$^{13}\text{C}$  NMR**

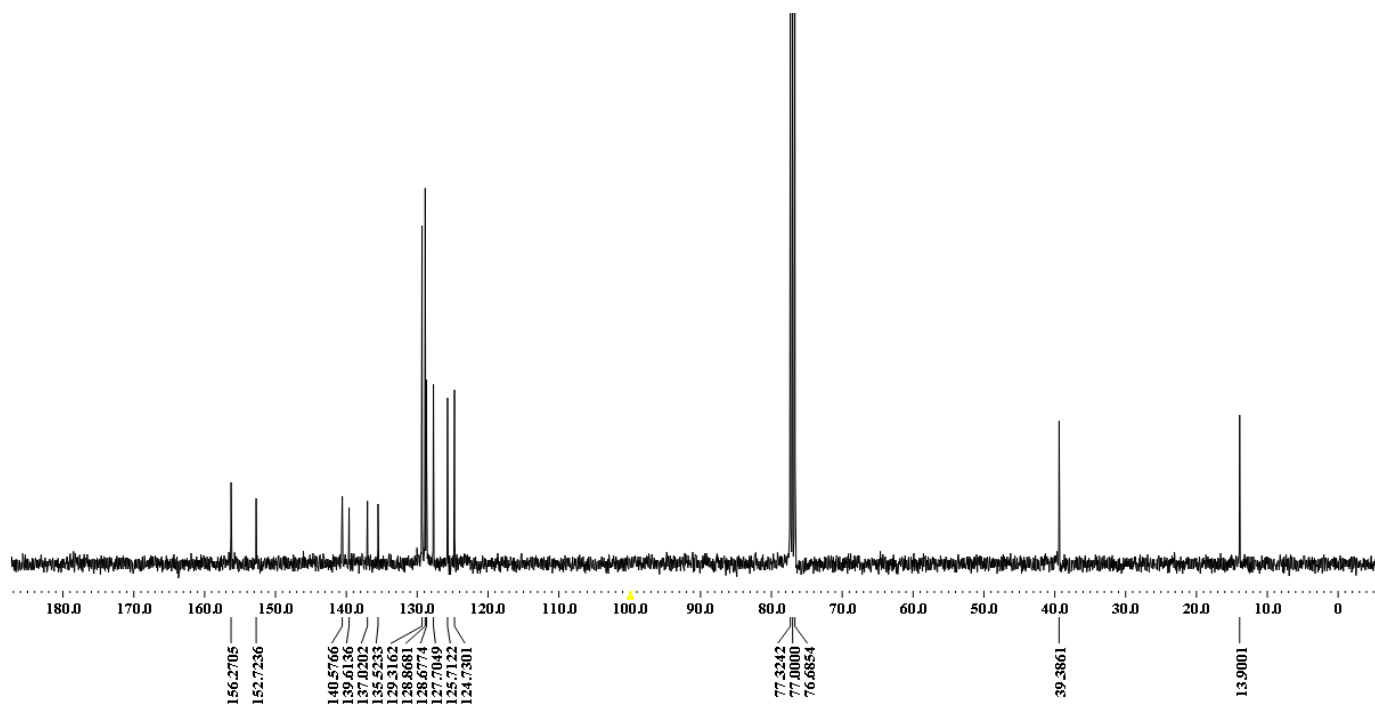

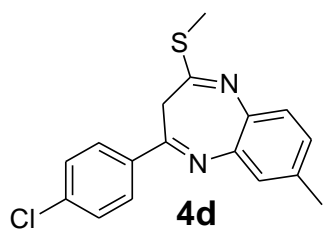

### <sup>1</sup>H NMR

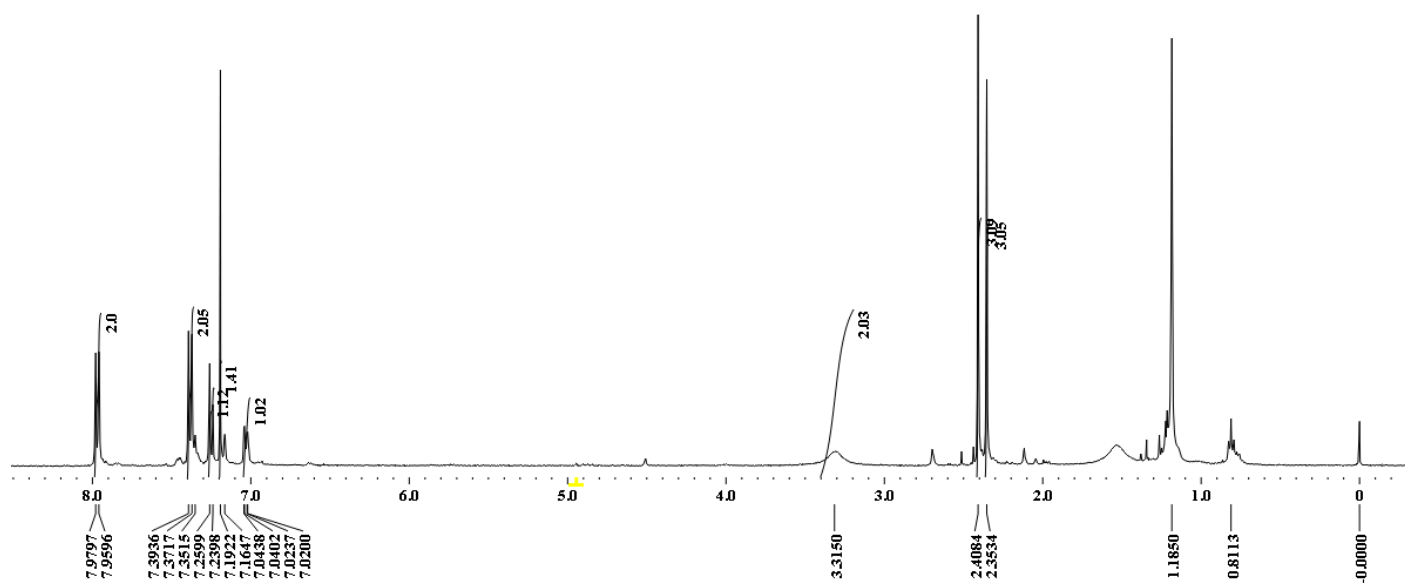

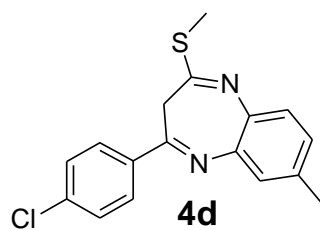

$^{13}\text{C}$  NMR

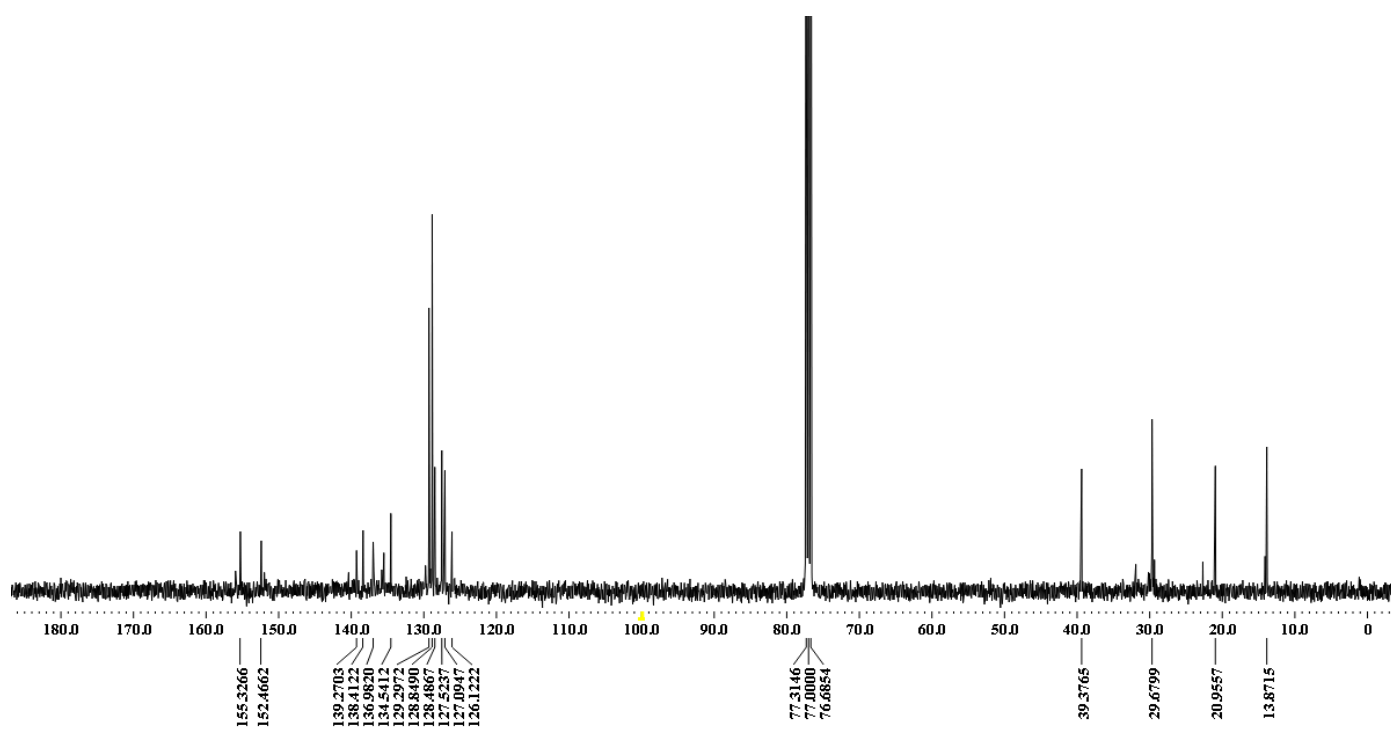

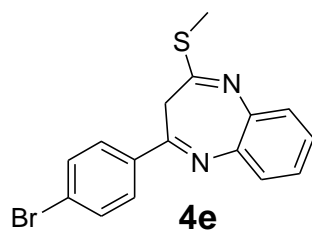

### $^1\text{H NMR}$

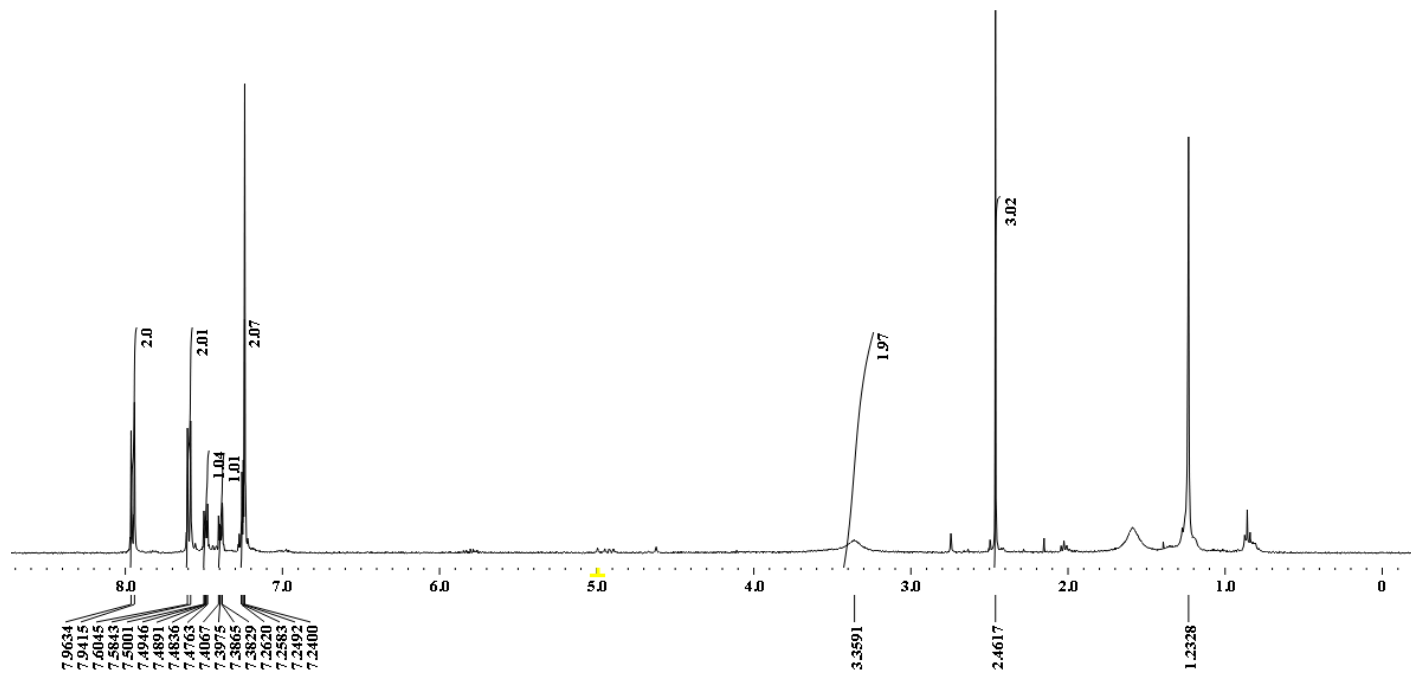

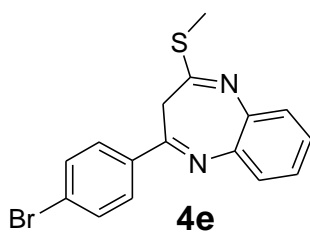

**<sup>13</sup>C NMR**

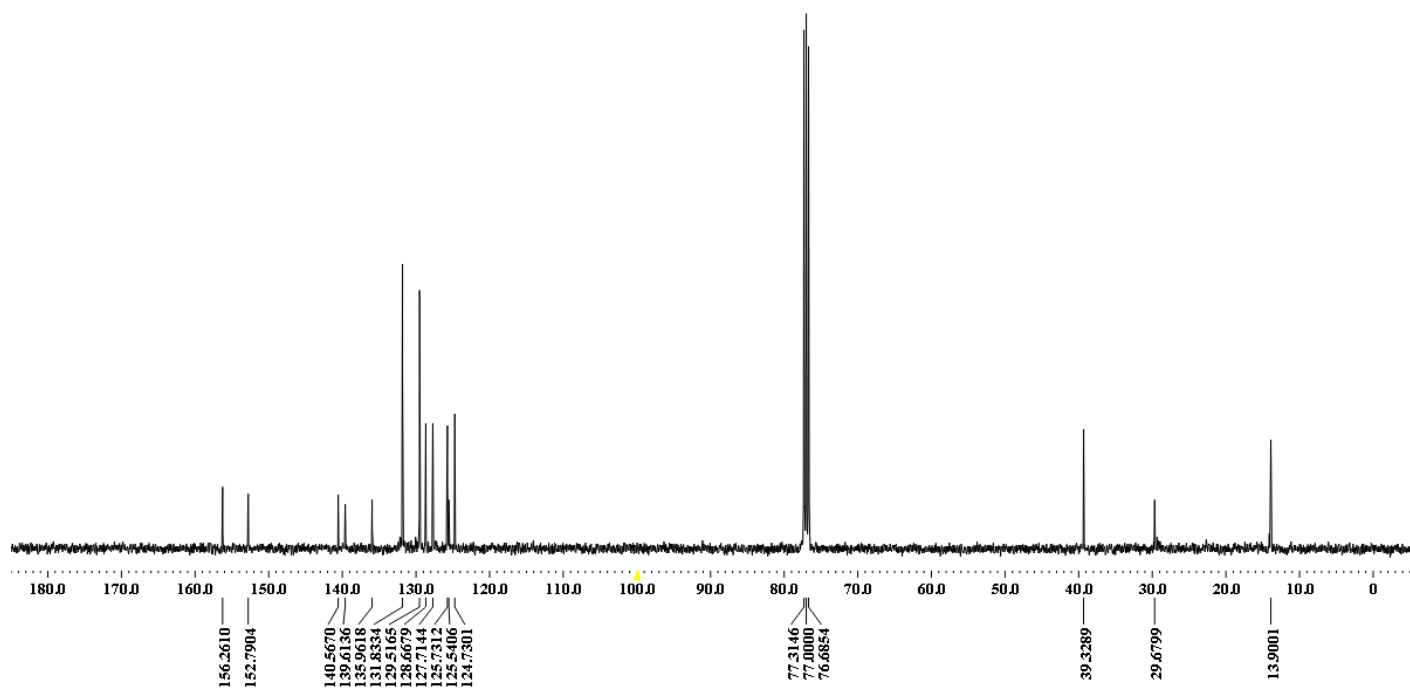



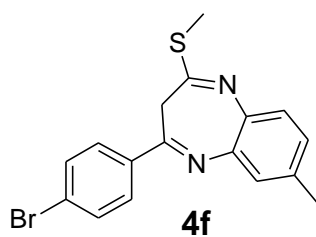

### <sup>1</sup>H NMR

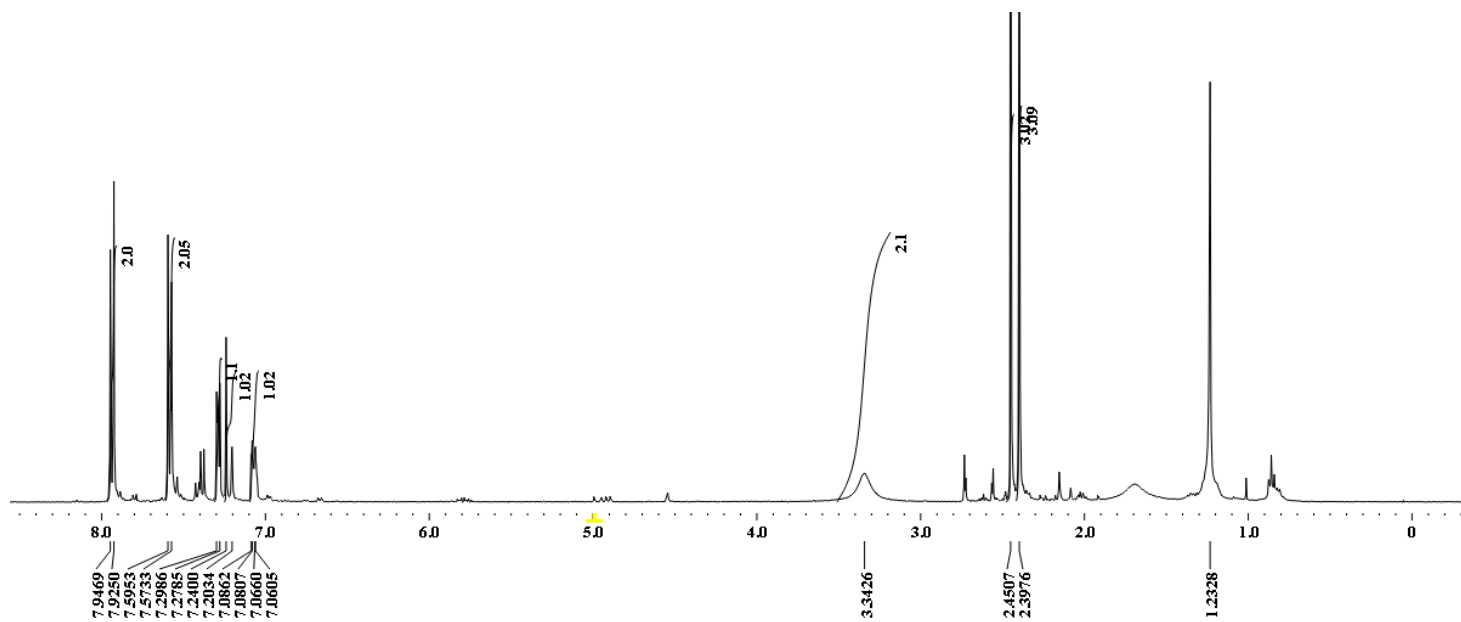

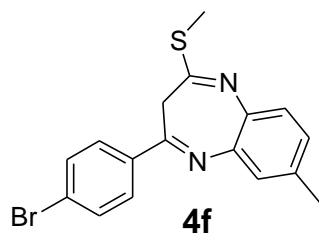

### $^{13}\text{C}$ NMR

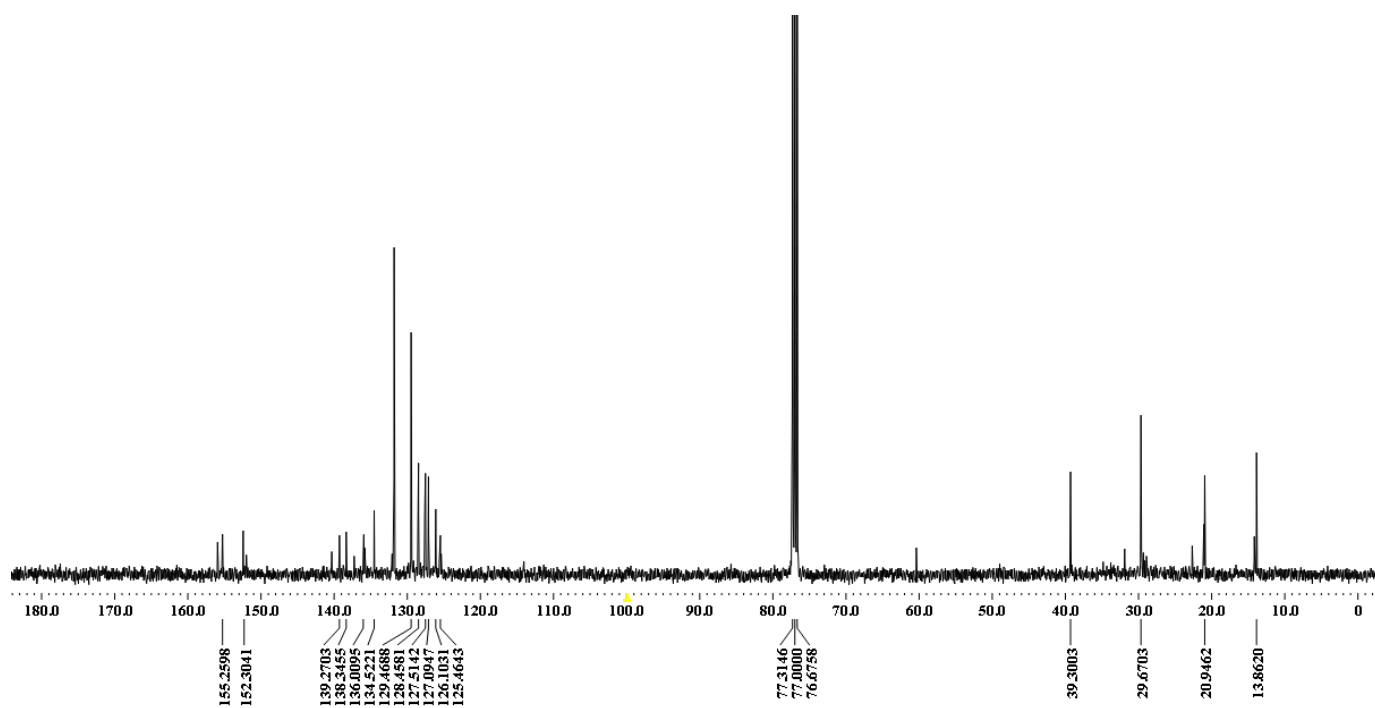

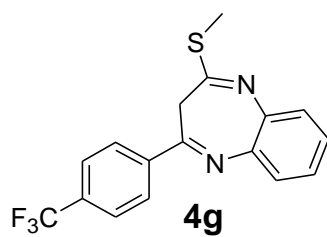

### <sup>1</sup>H NMR

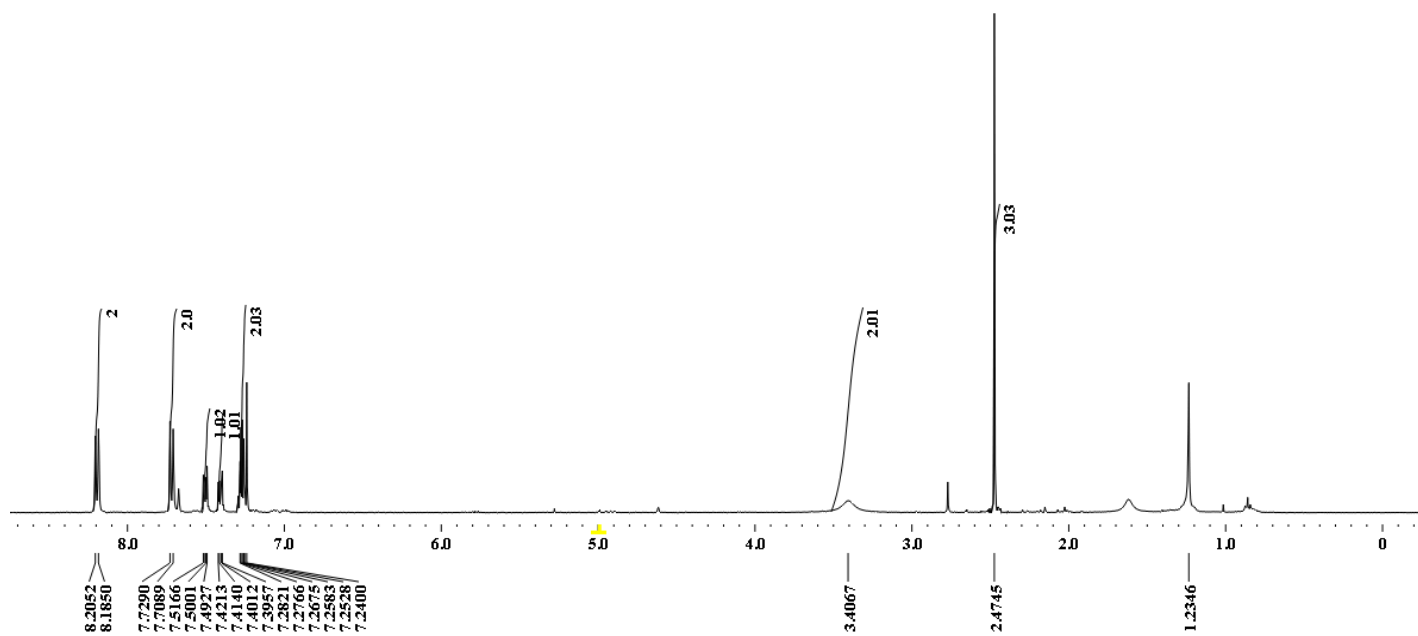

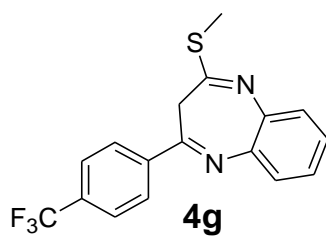

**<sup>13</sup>C NMR**

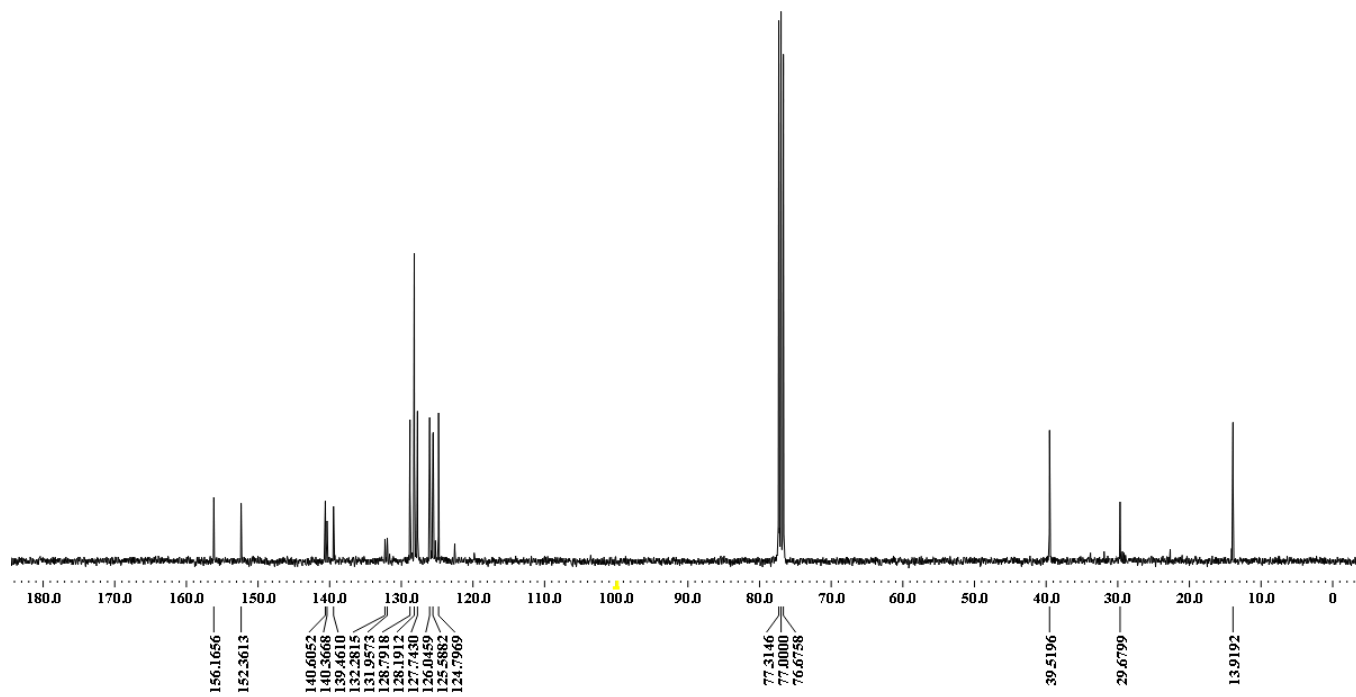

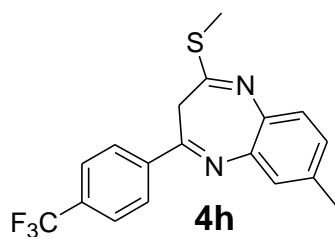

### <sup>1</sup>H NMR

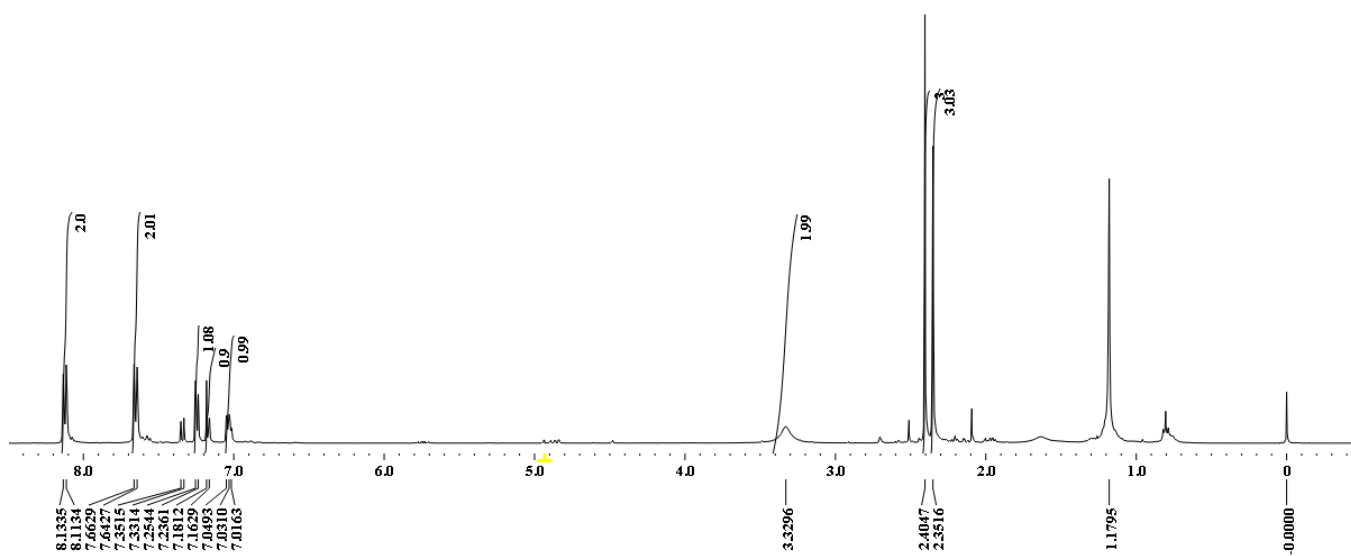

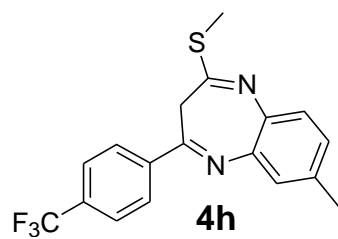

<sup>13</sup>C NMR

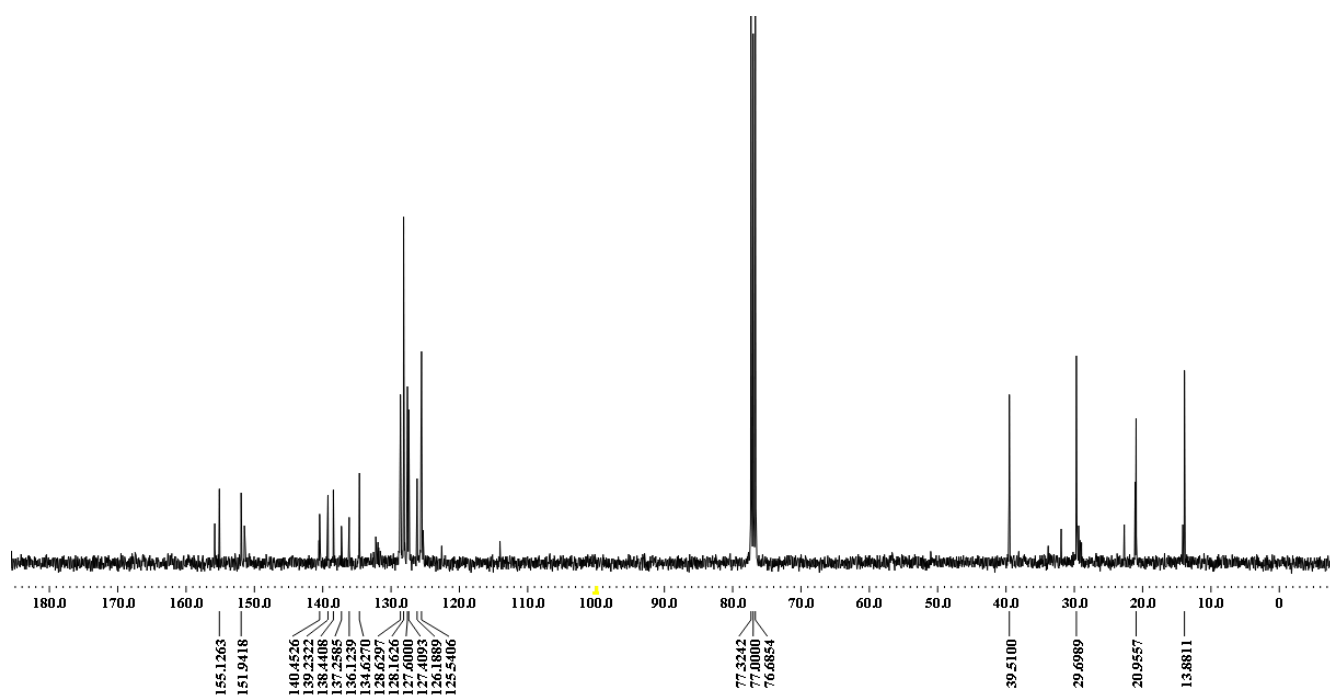

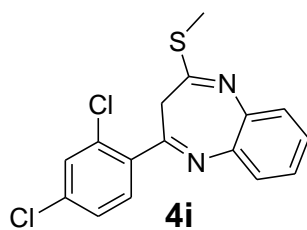

### $^1\text{H NMR}$

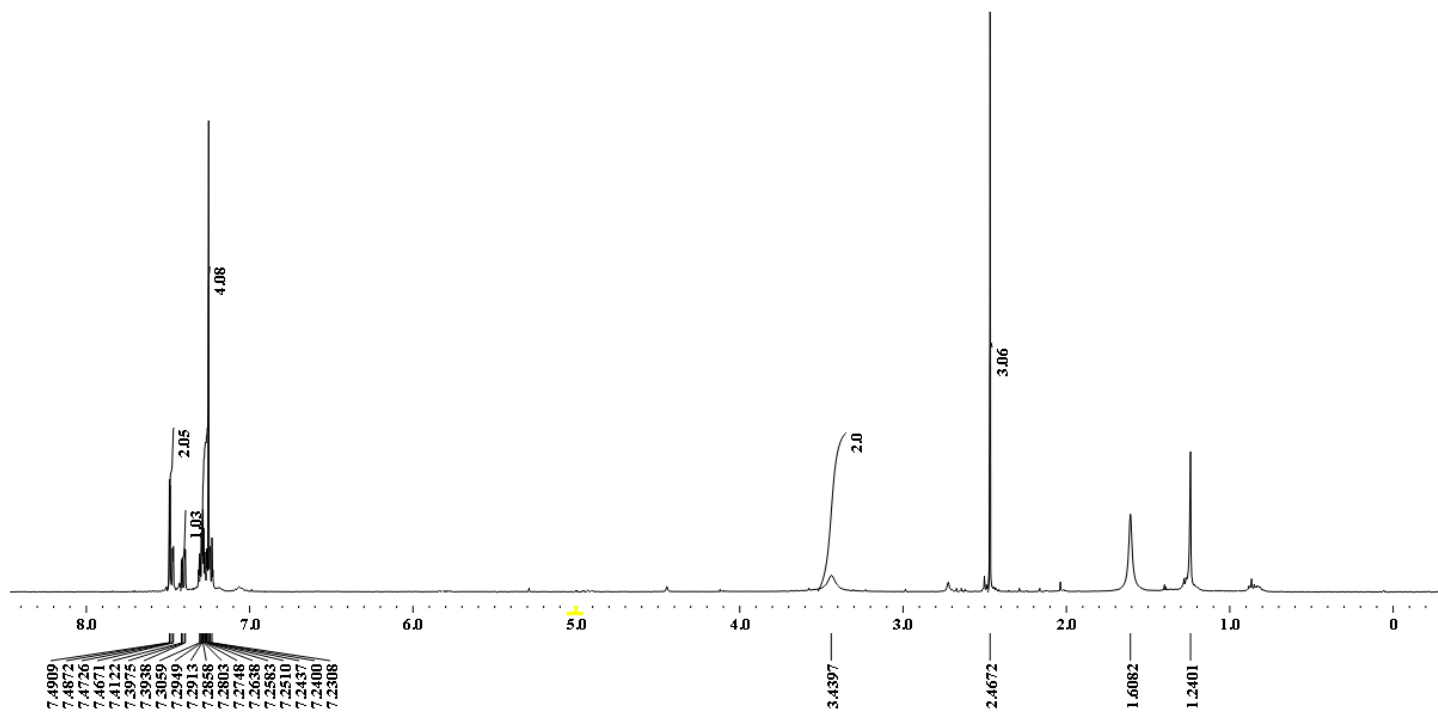

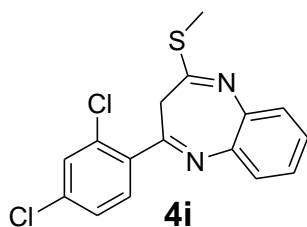

**$^{13}\text{C}$  NMR**

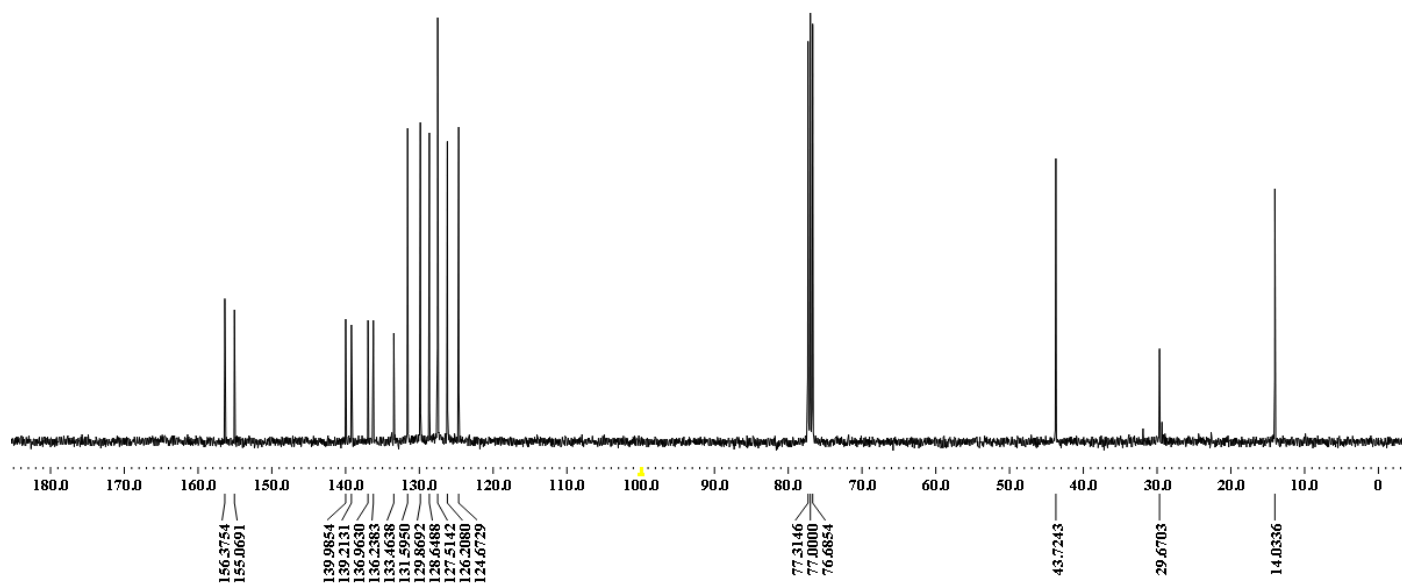



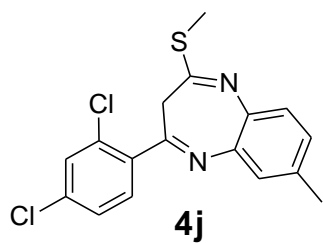

### $^1\text{H NMR}$

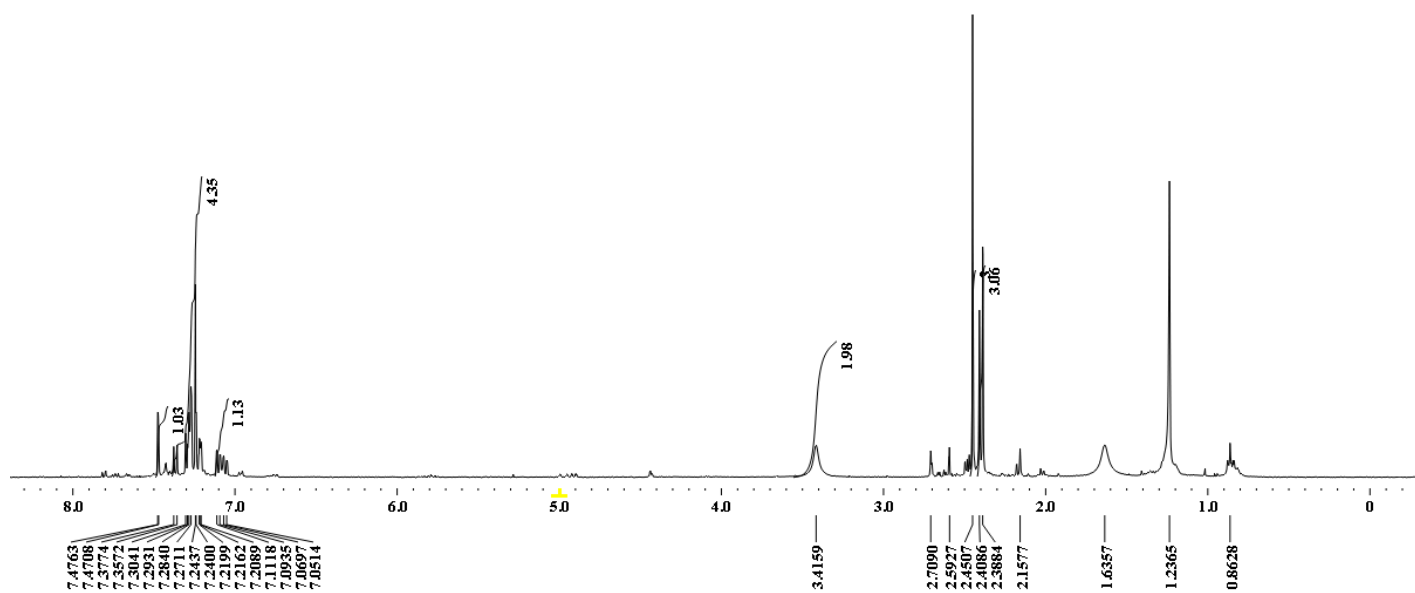

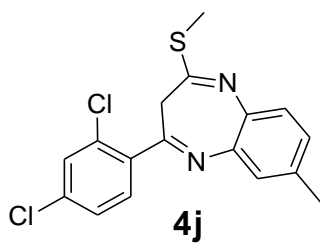

<sup>13</sup>C NMR

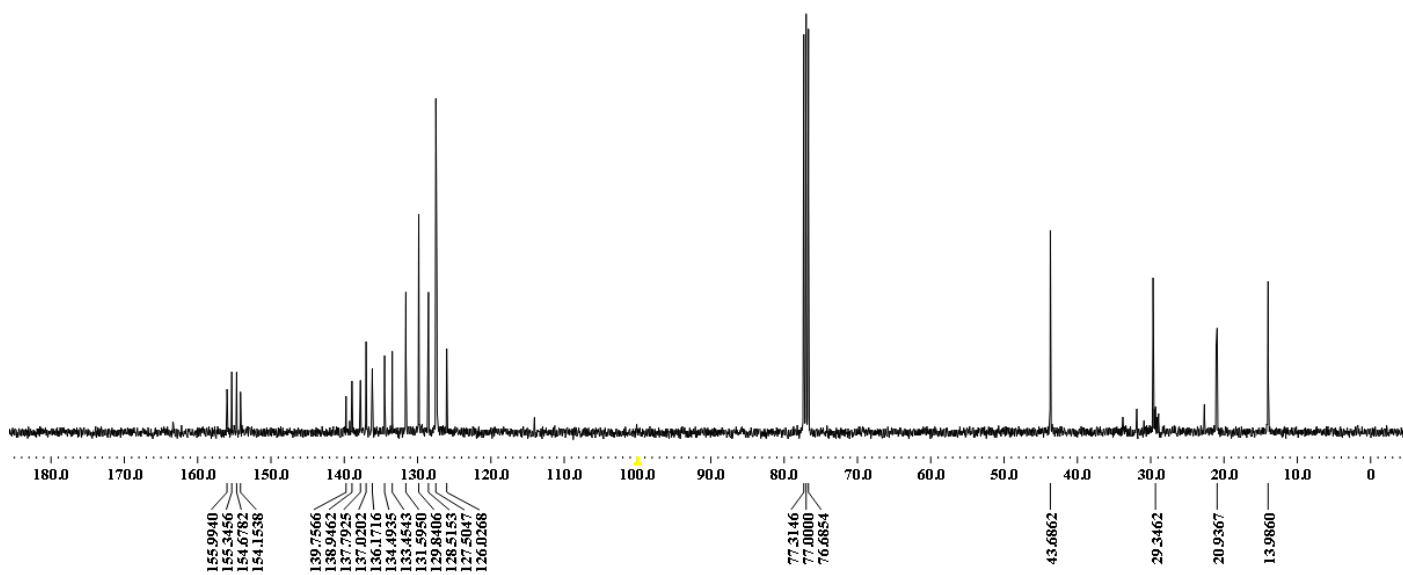

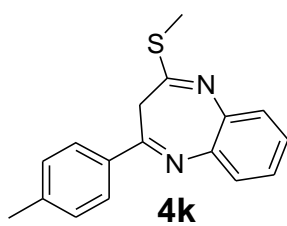

**$^{13}\text{C}$  NMR**

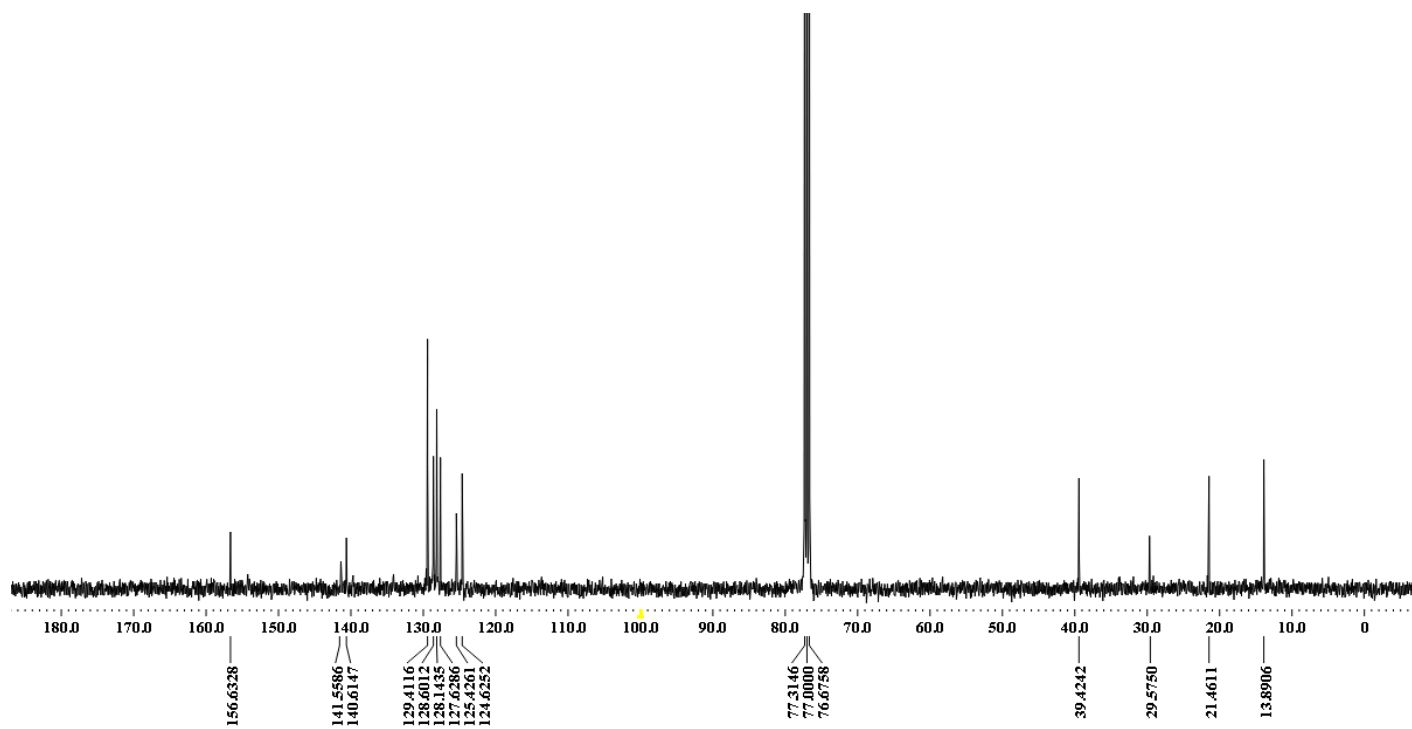

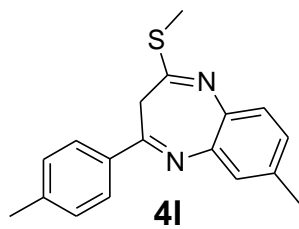

### <sup>1</sup>H NMR

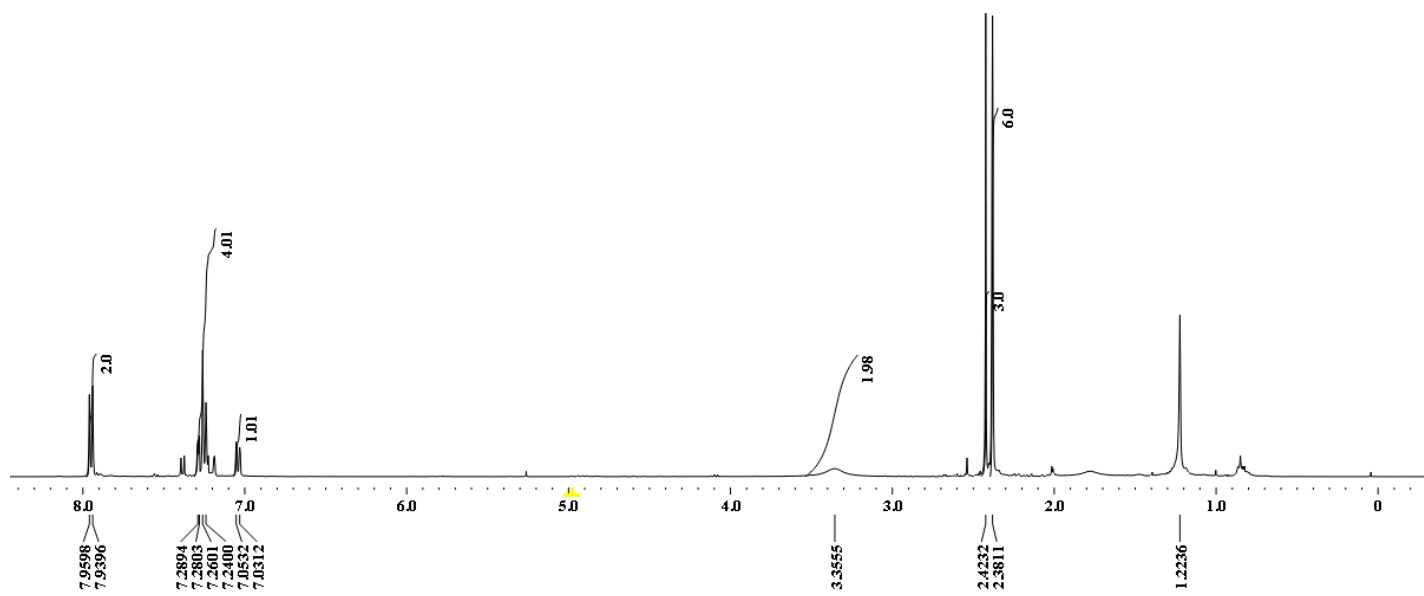

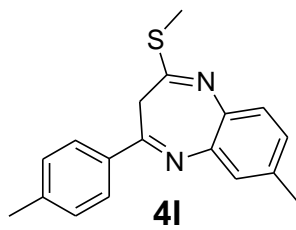

### <sup>13</sup>C NMR

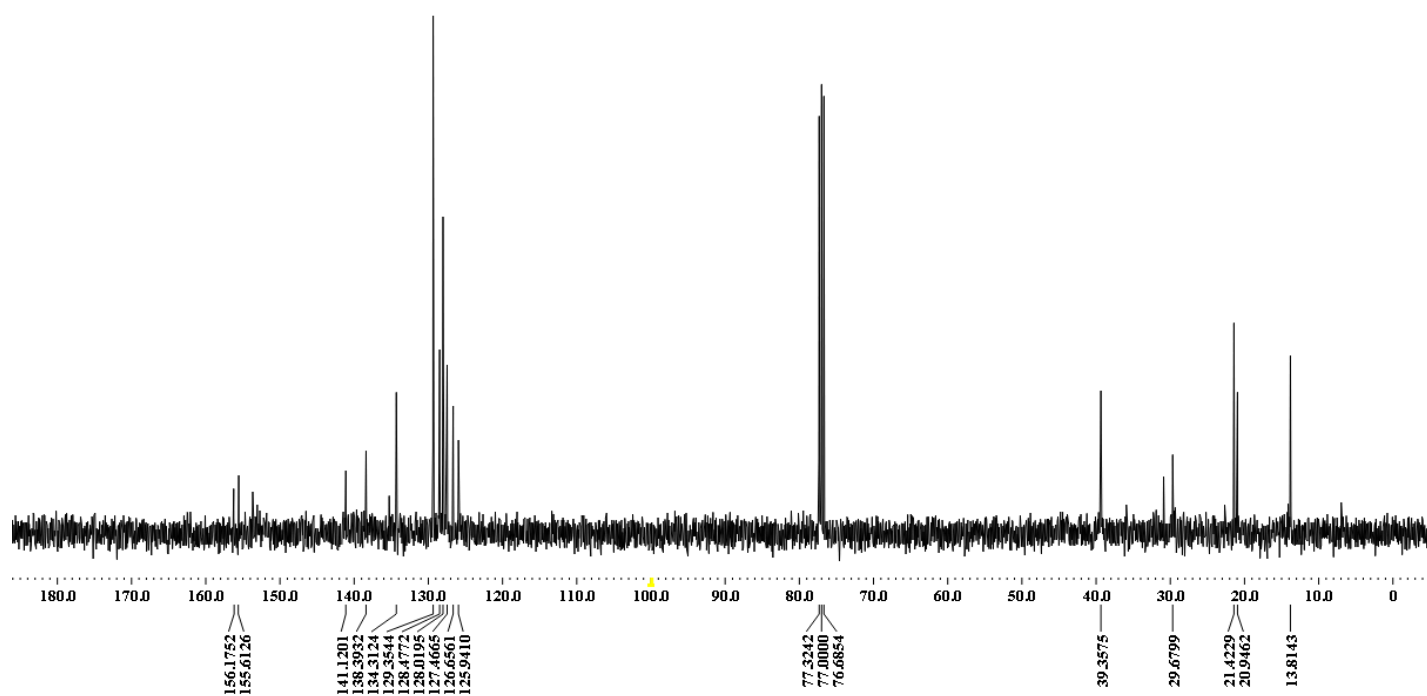

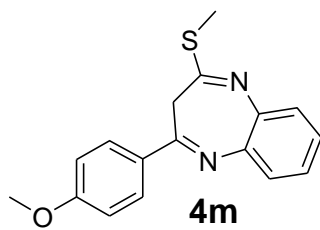

$^{13}\text{C}$  NMR

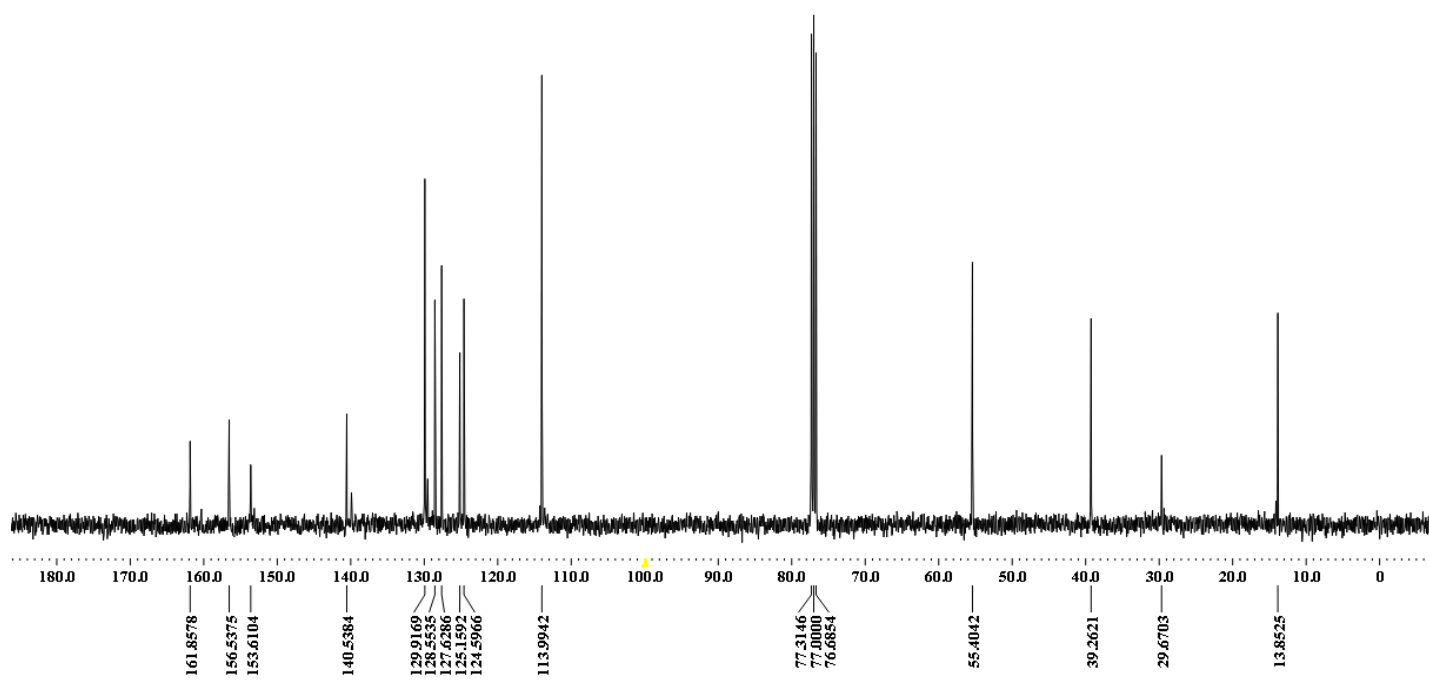

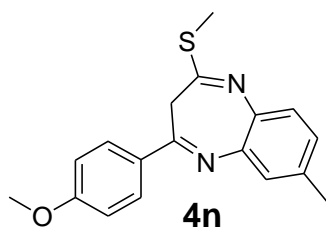

### <sup>1</sup>H NMR

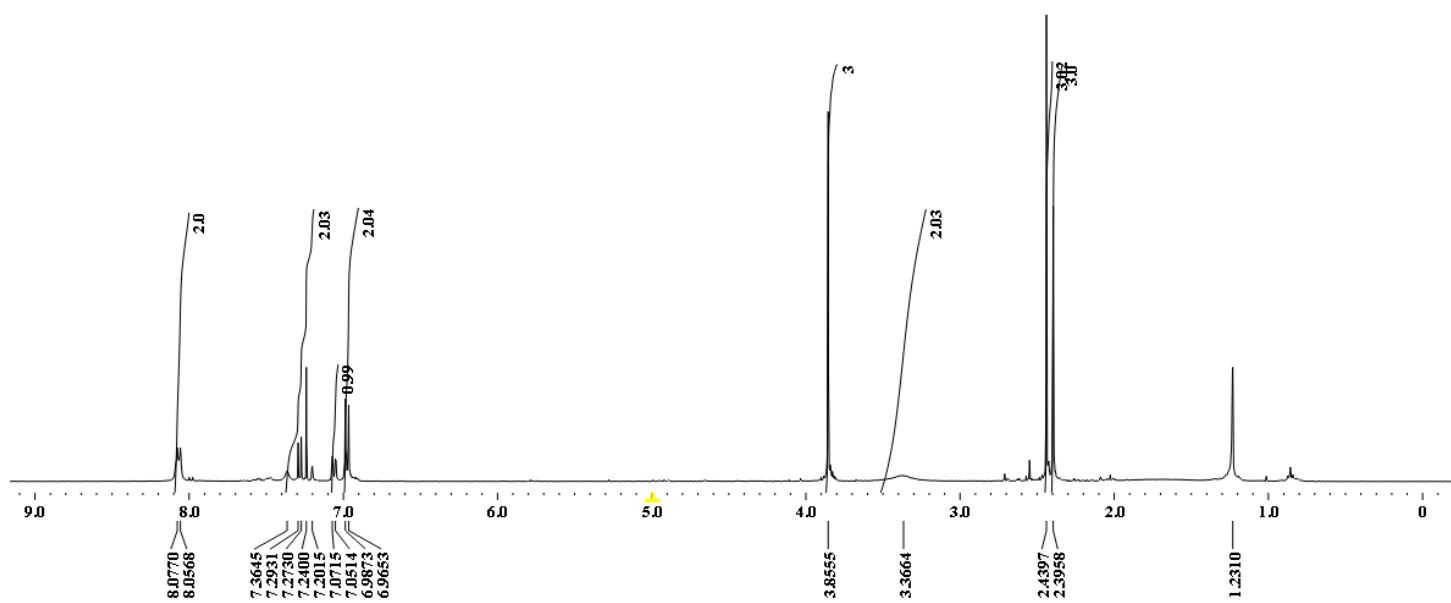

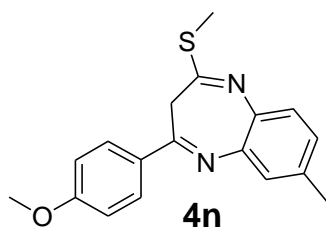

### $^{13}\text{C}$ NMR

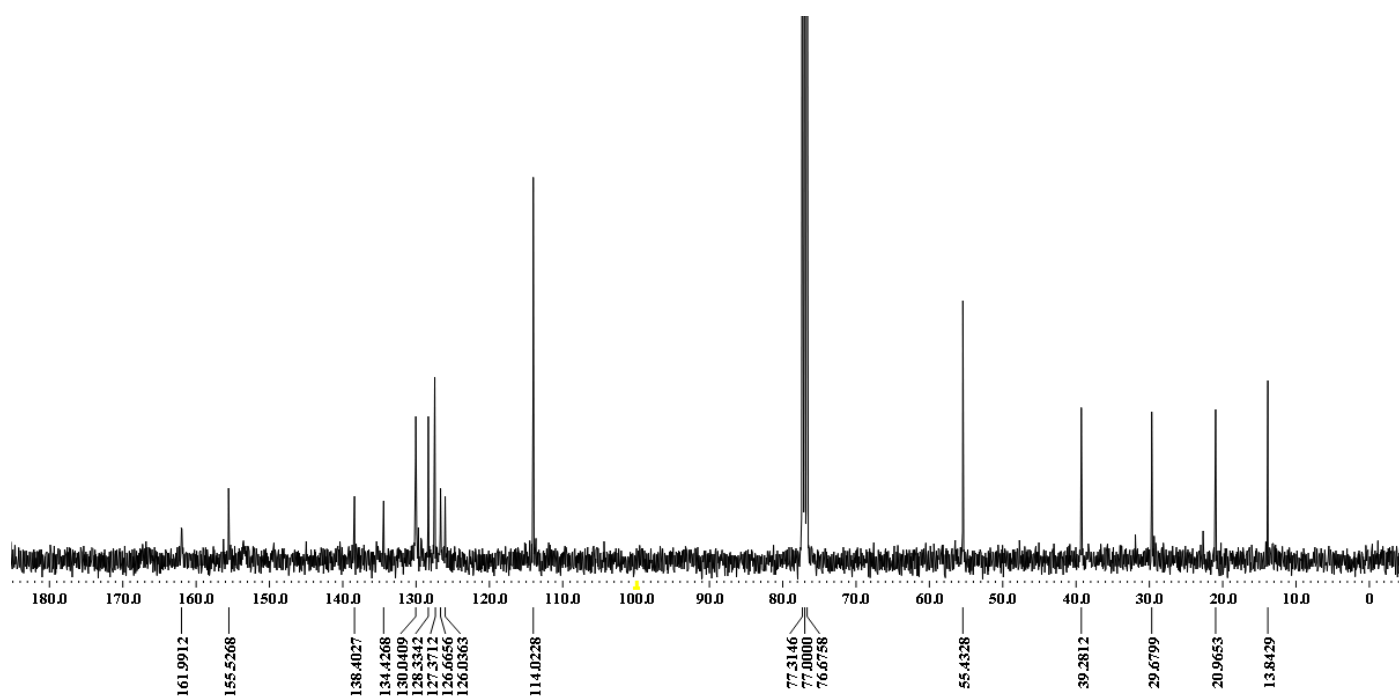



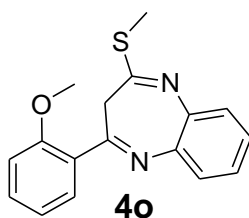

### <sup>1</sup>H NMR

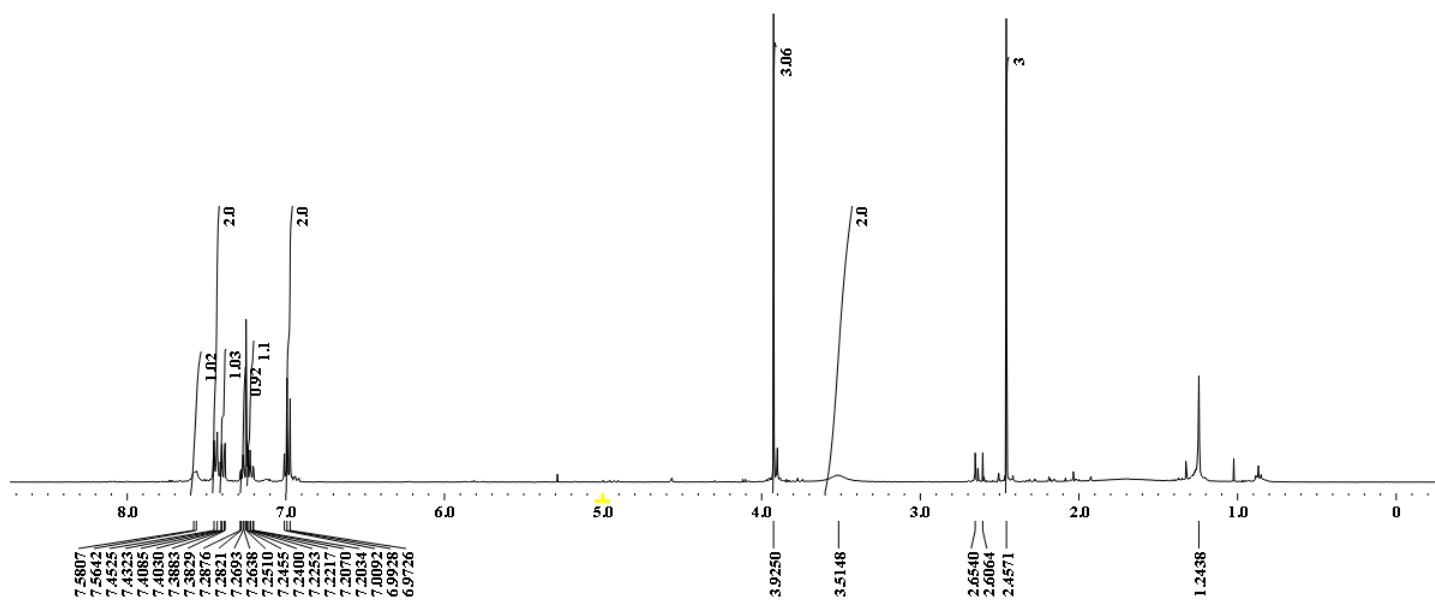

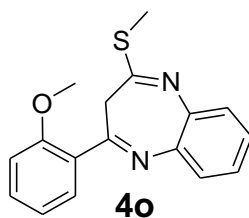

$^{13}\text{C}$  NMR

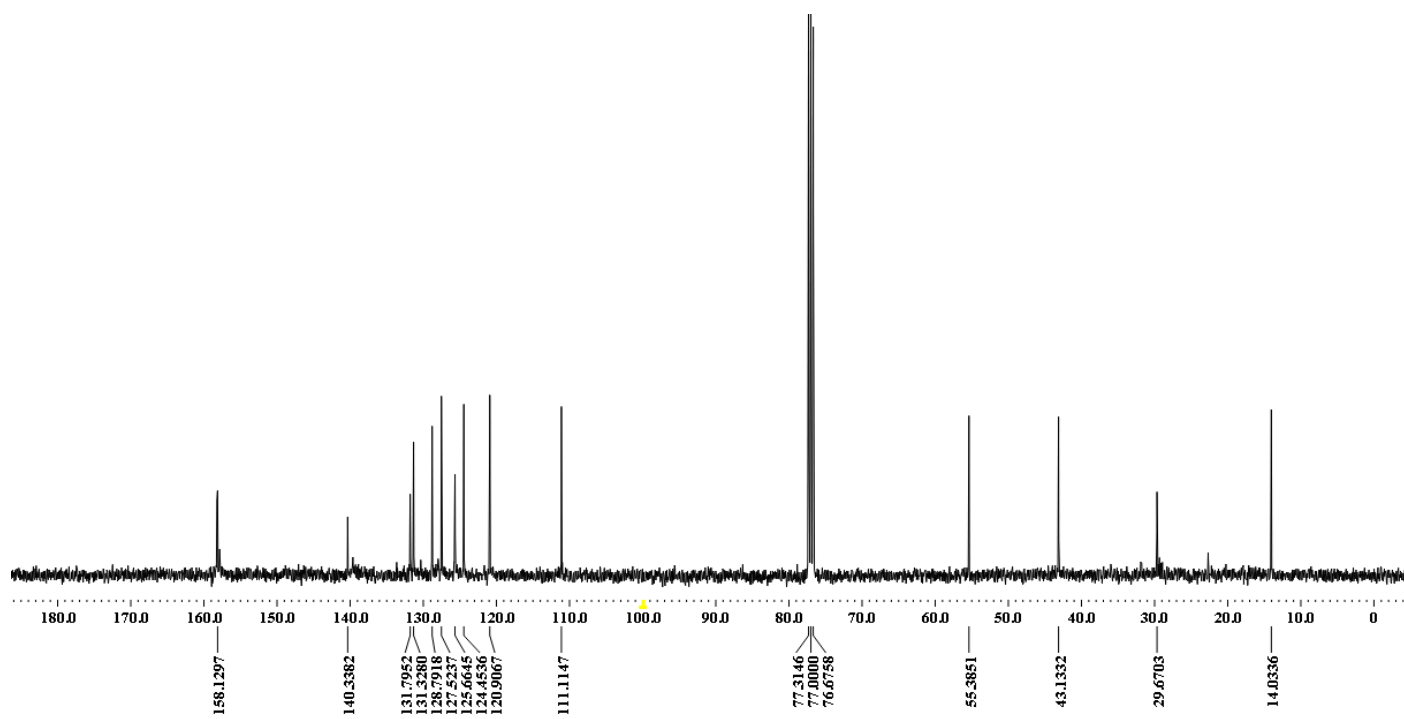

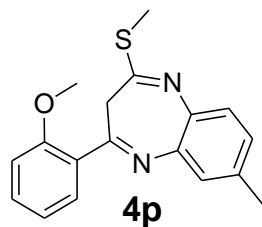

**<sup>1</sup>H NMR**

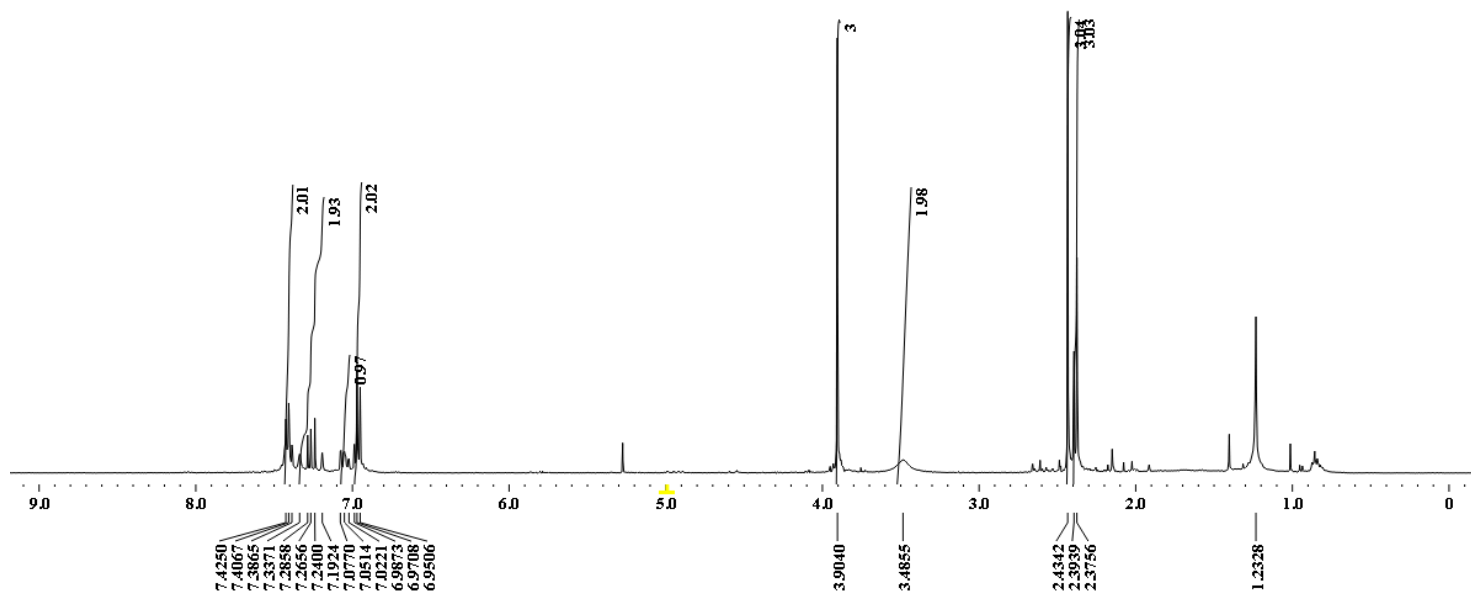

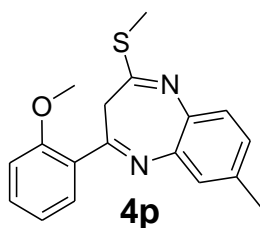

<sup>13</sup>C NMR

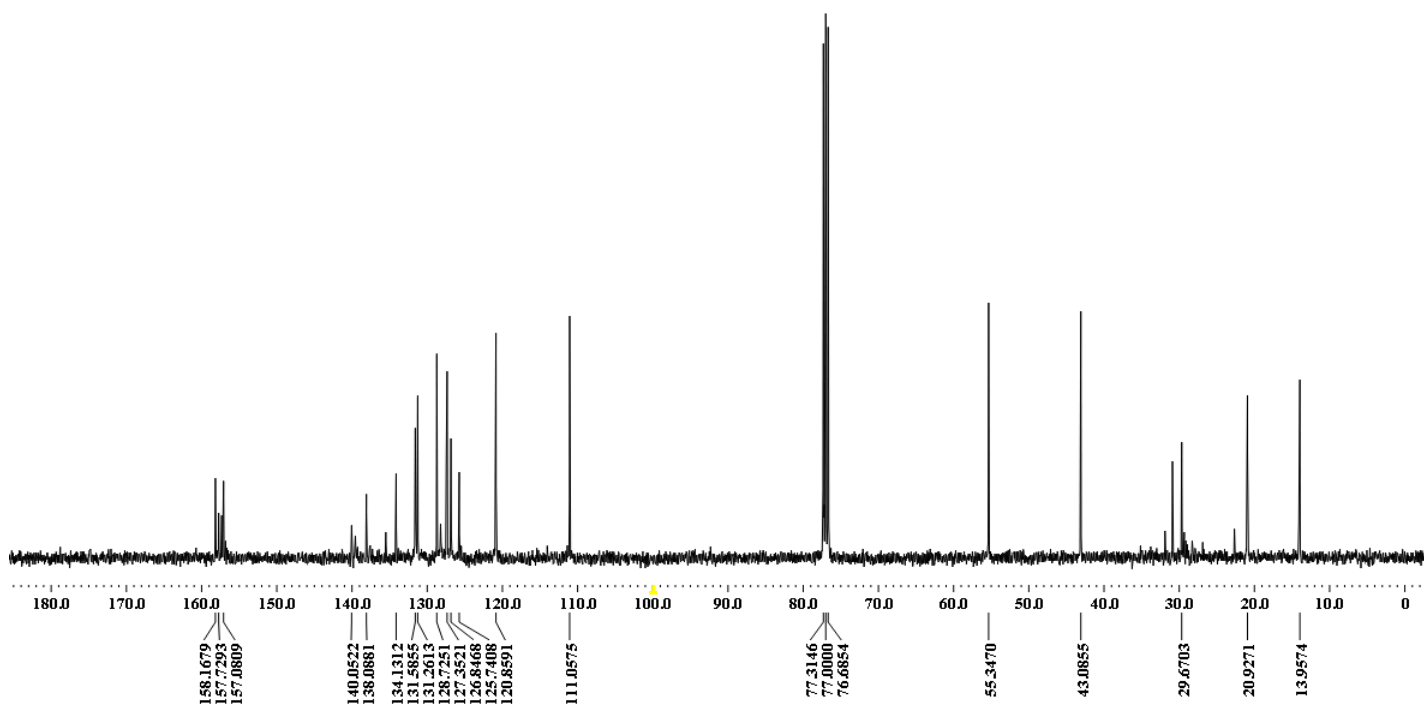

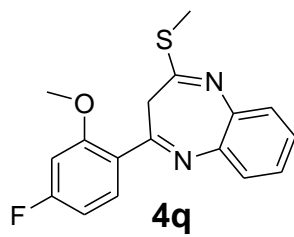

**<sup>1</sup>H NMR**

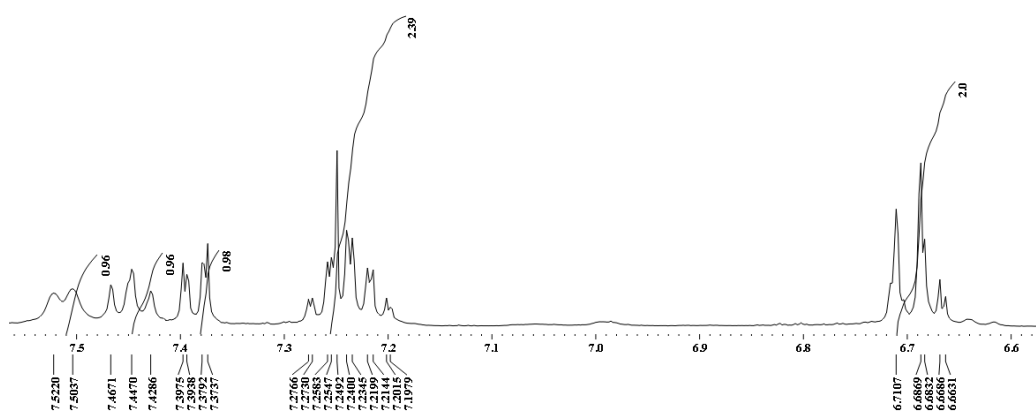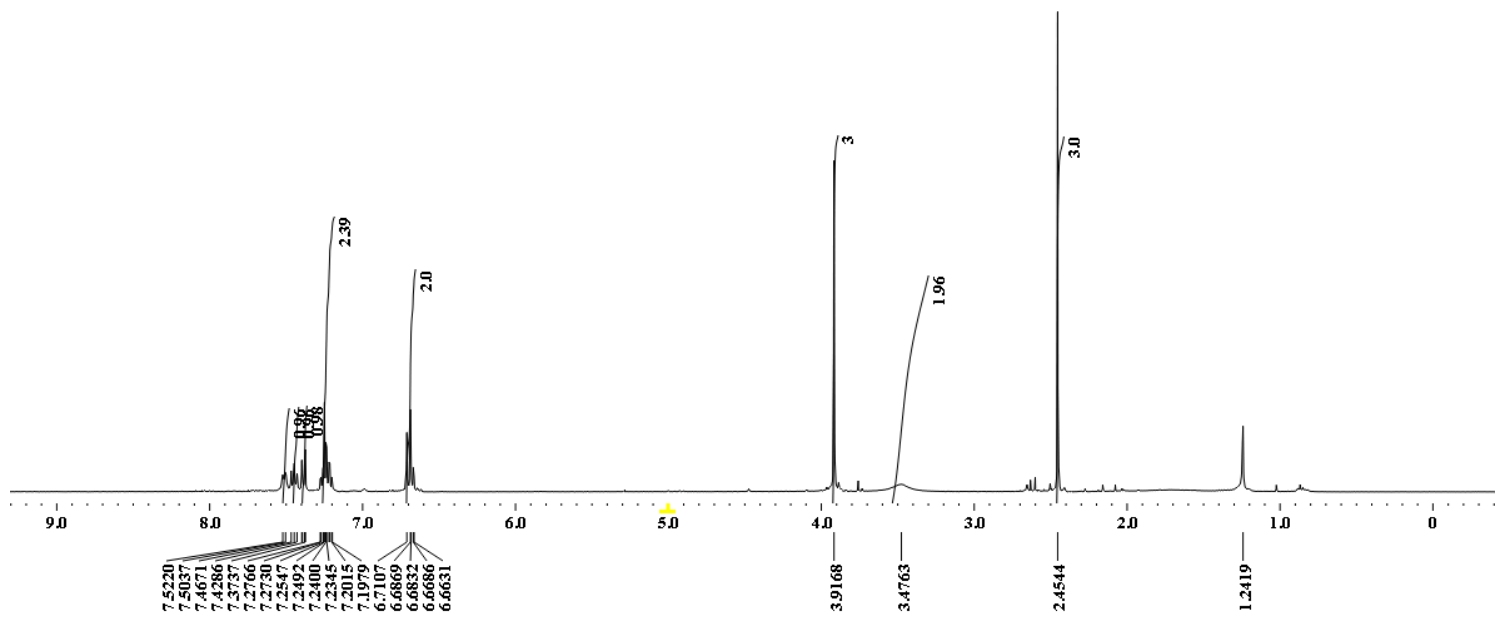

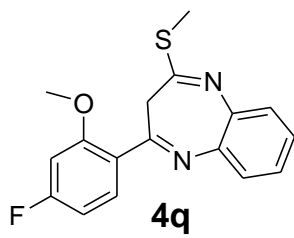

<sup>13</sup>C NMR

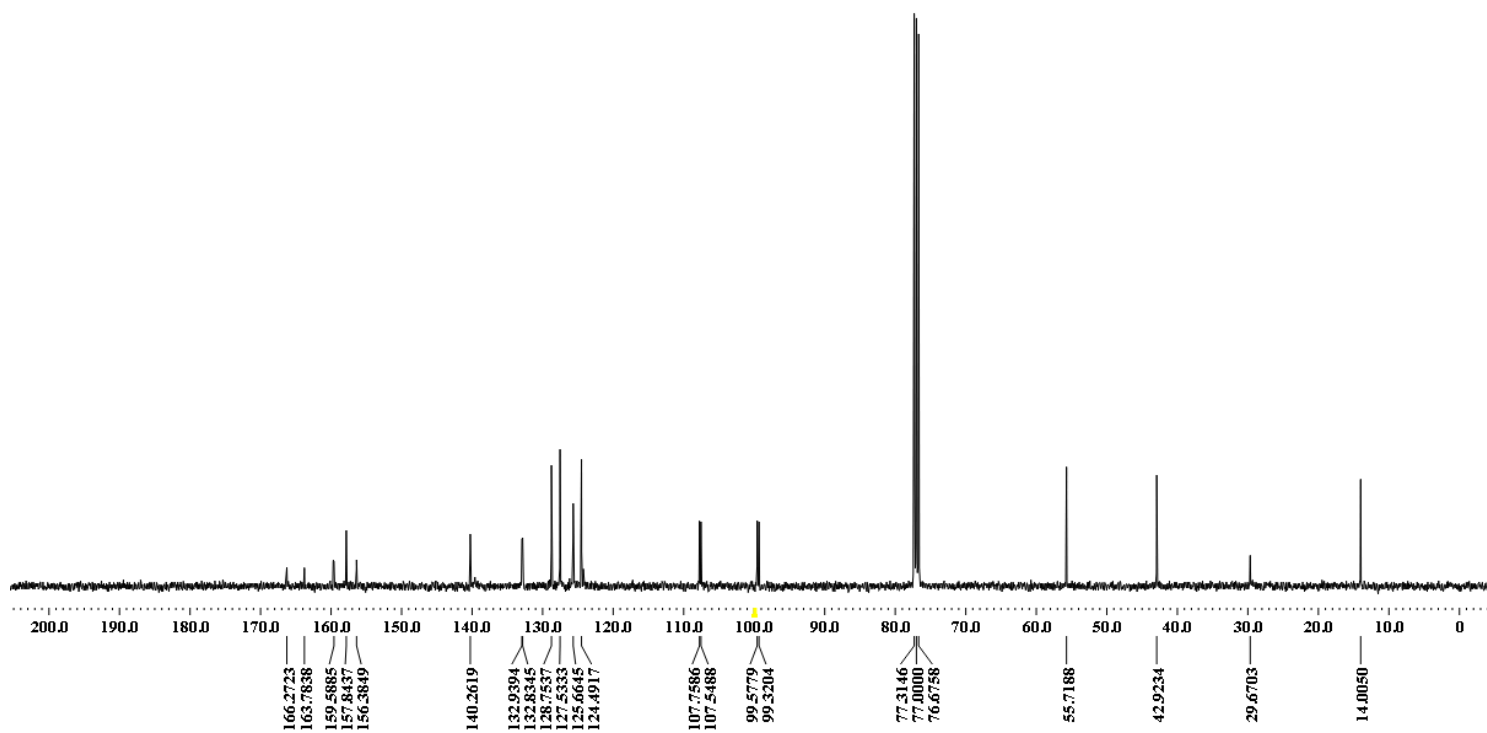

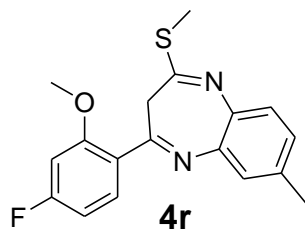

### <sup>1</sup>H NMR

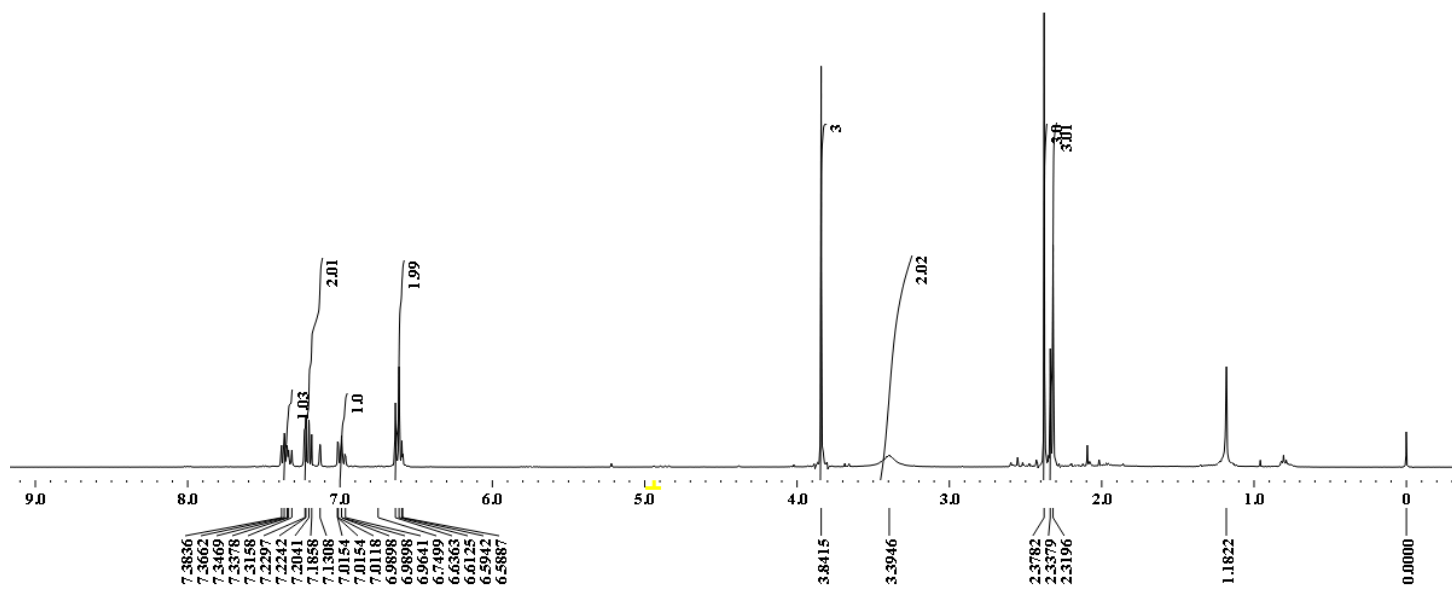

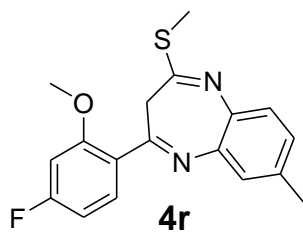

<sup>13</sup>C NMR

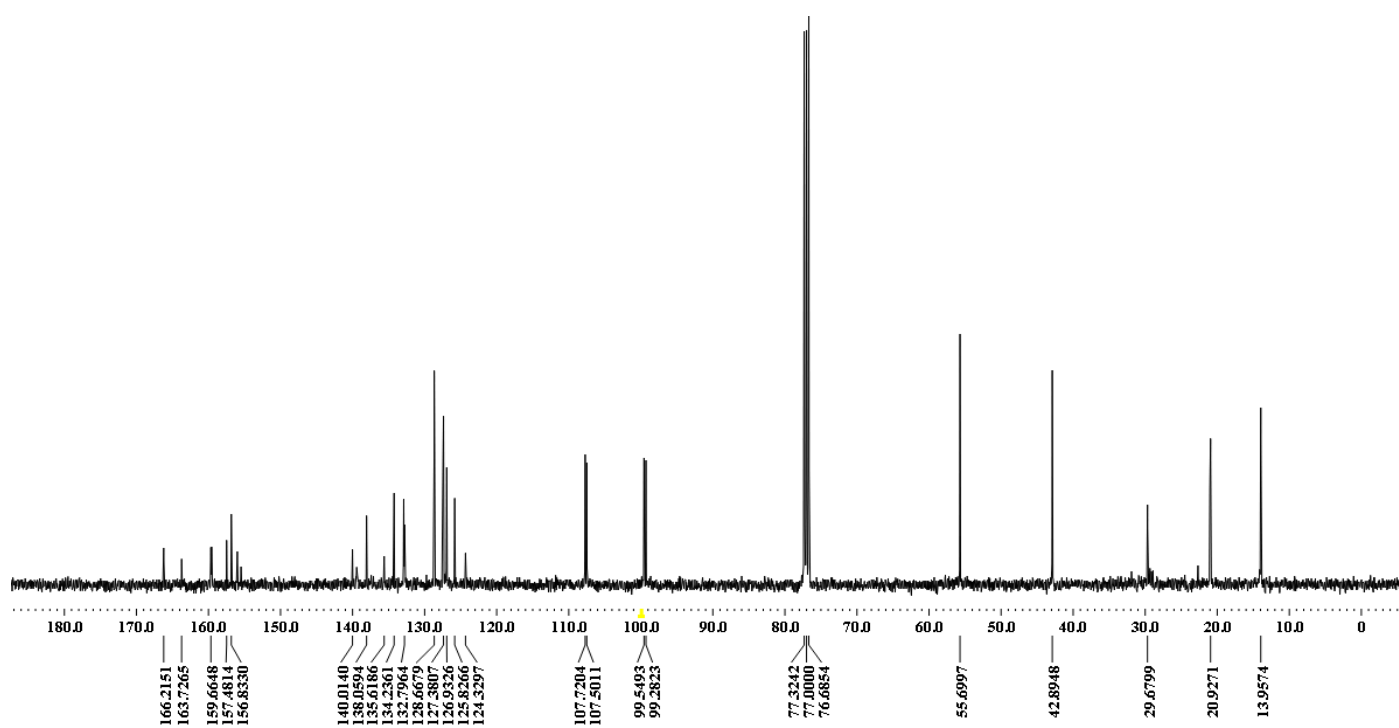



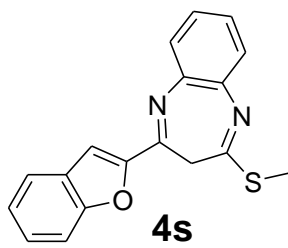

**<sup>1</sup>H NMR**

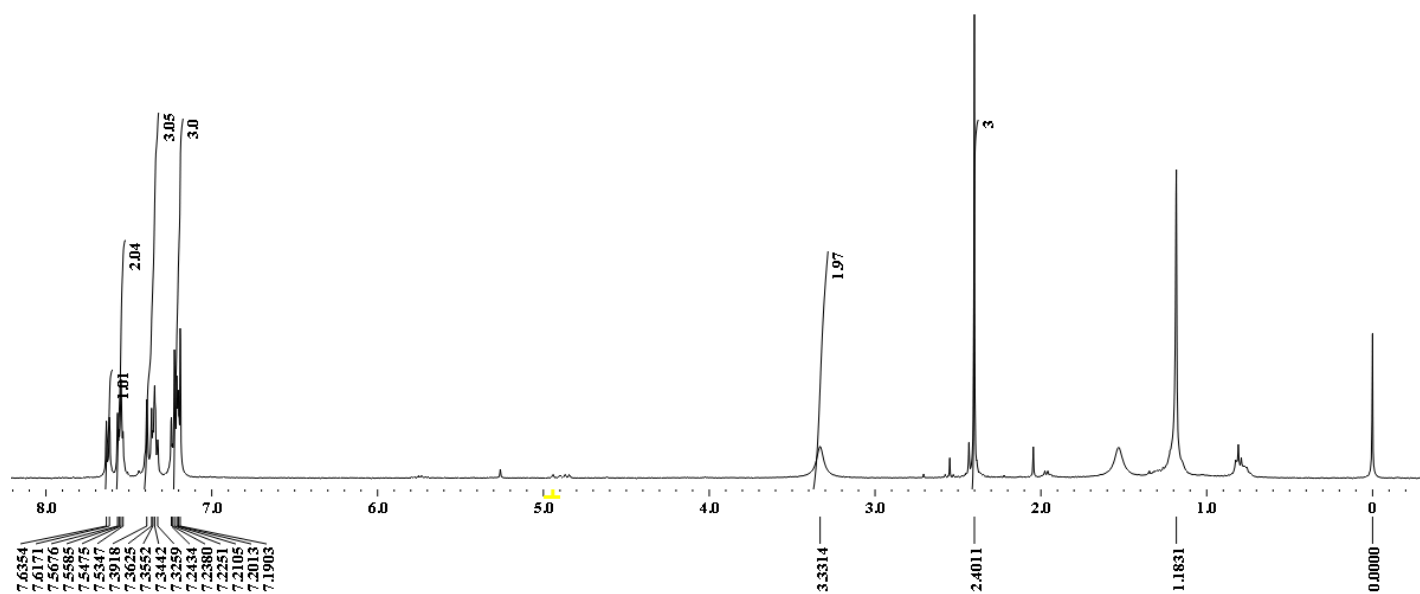

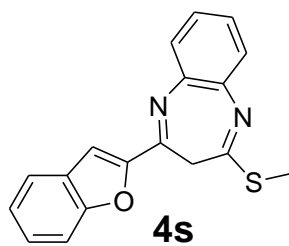

**<sup>13</sup>C NMR**

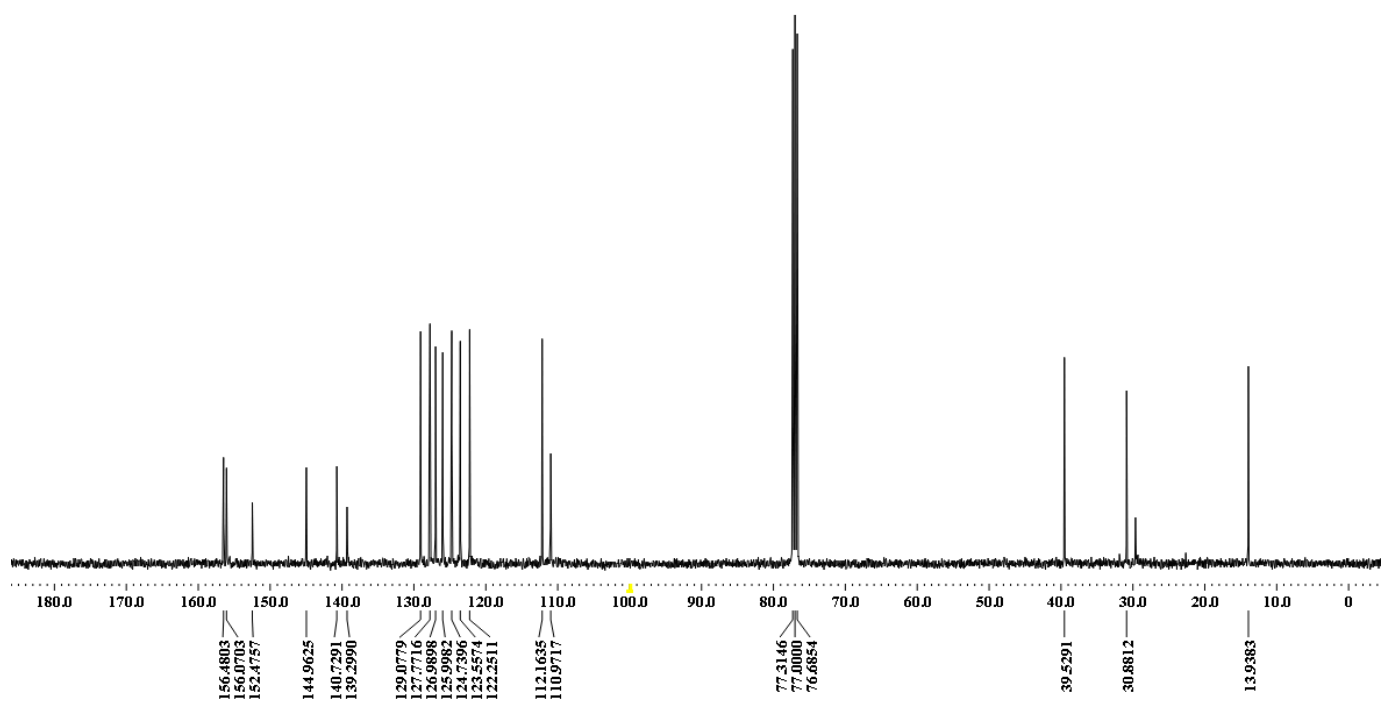

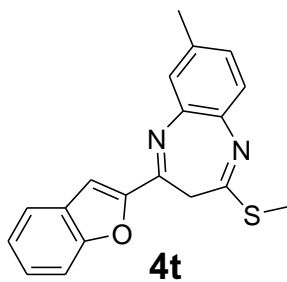

**<sup>1</sup>H NMR**

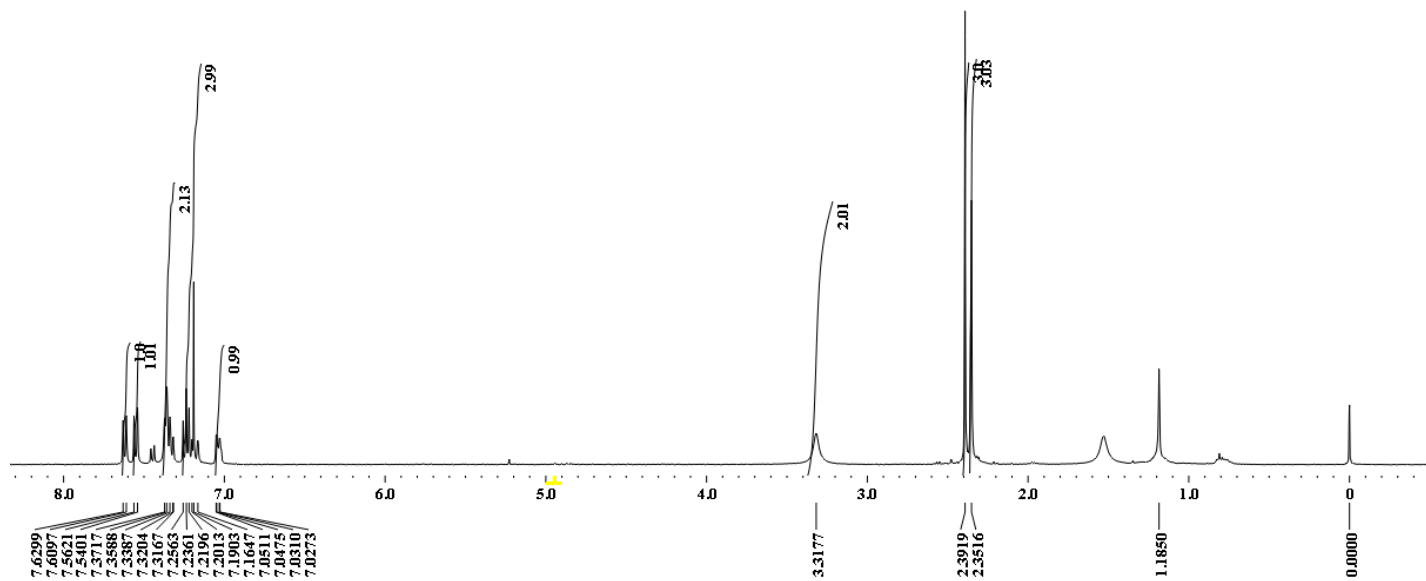

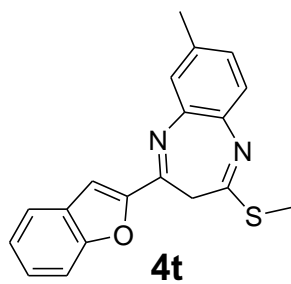

<sup>13</sup>C NMR

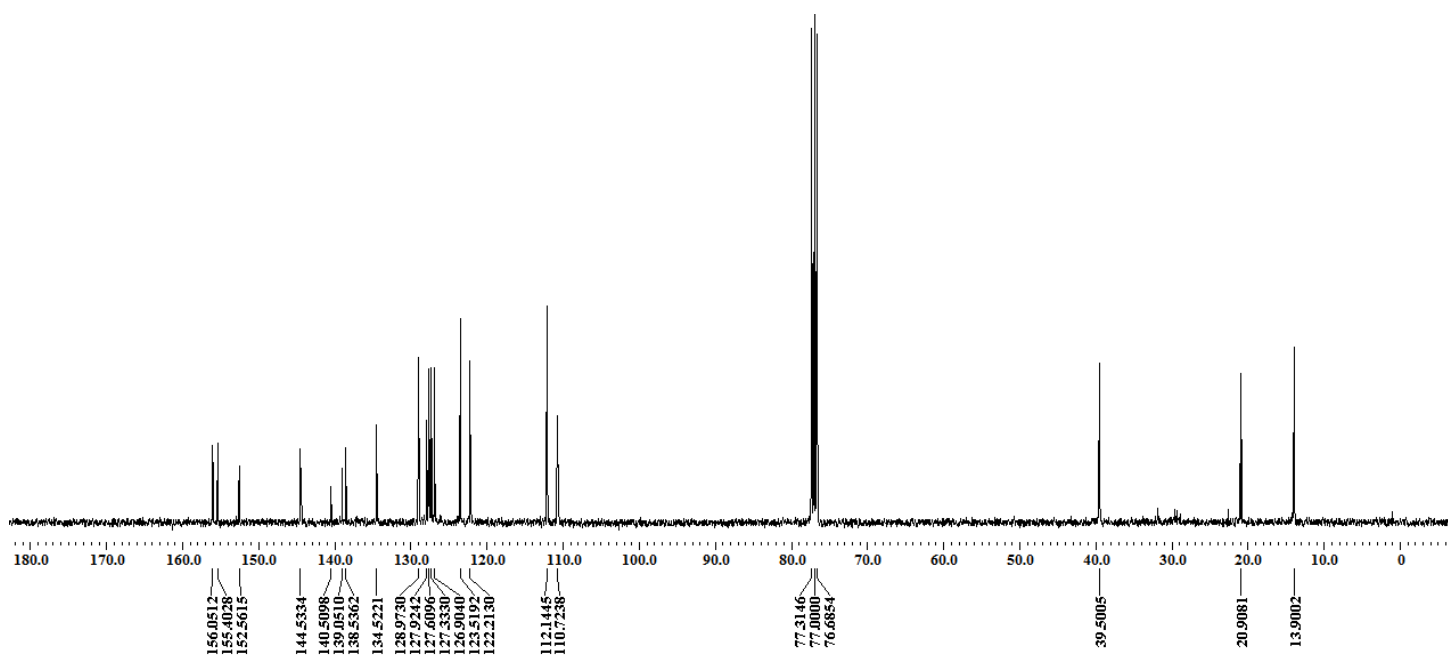

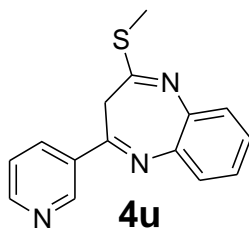

**<sup>1</sup>H NMR**

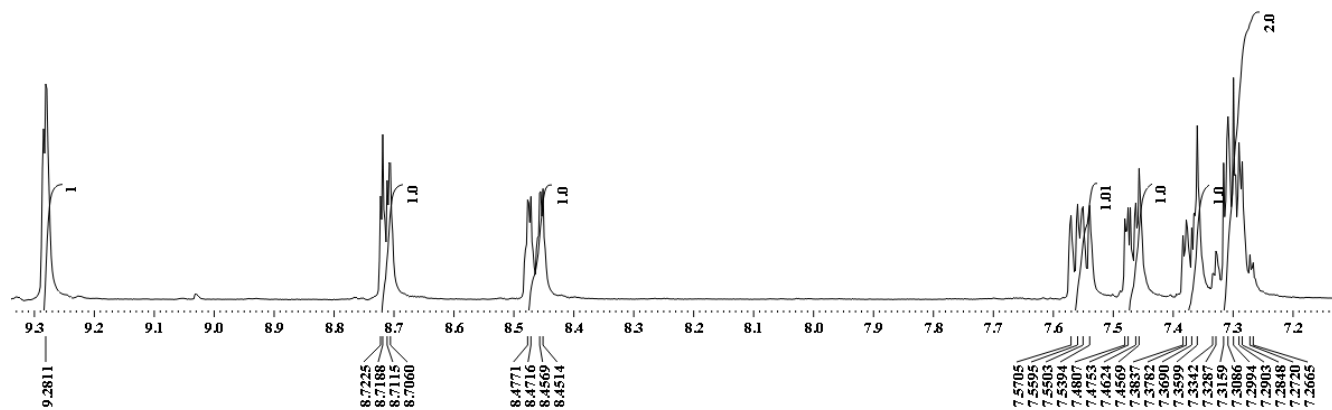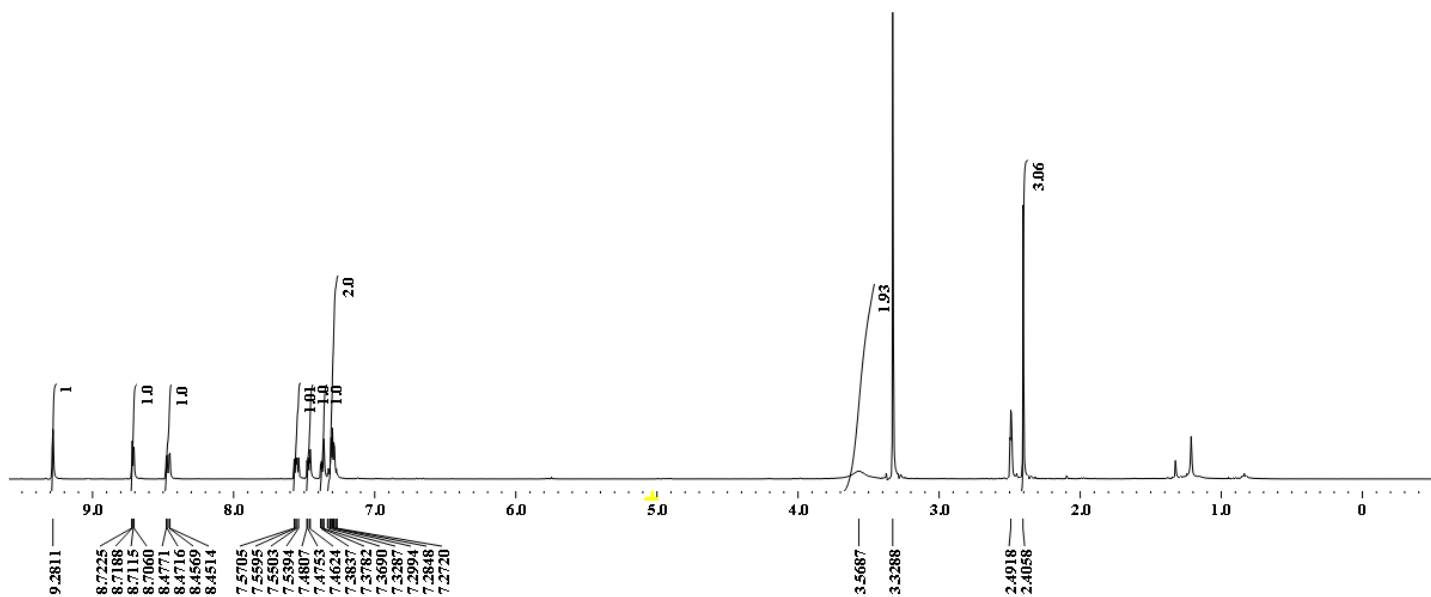

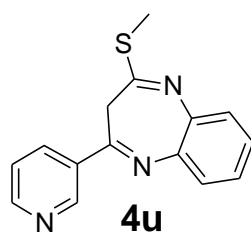

**<sup>13</sup>C NMR**

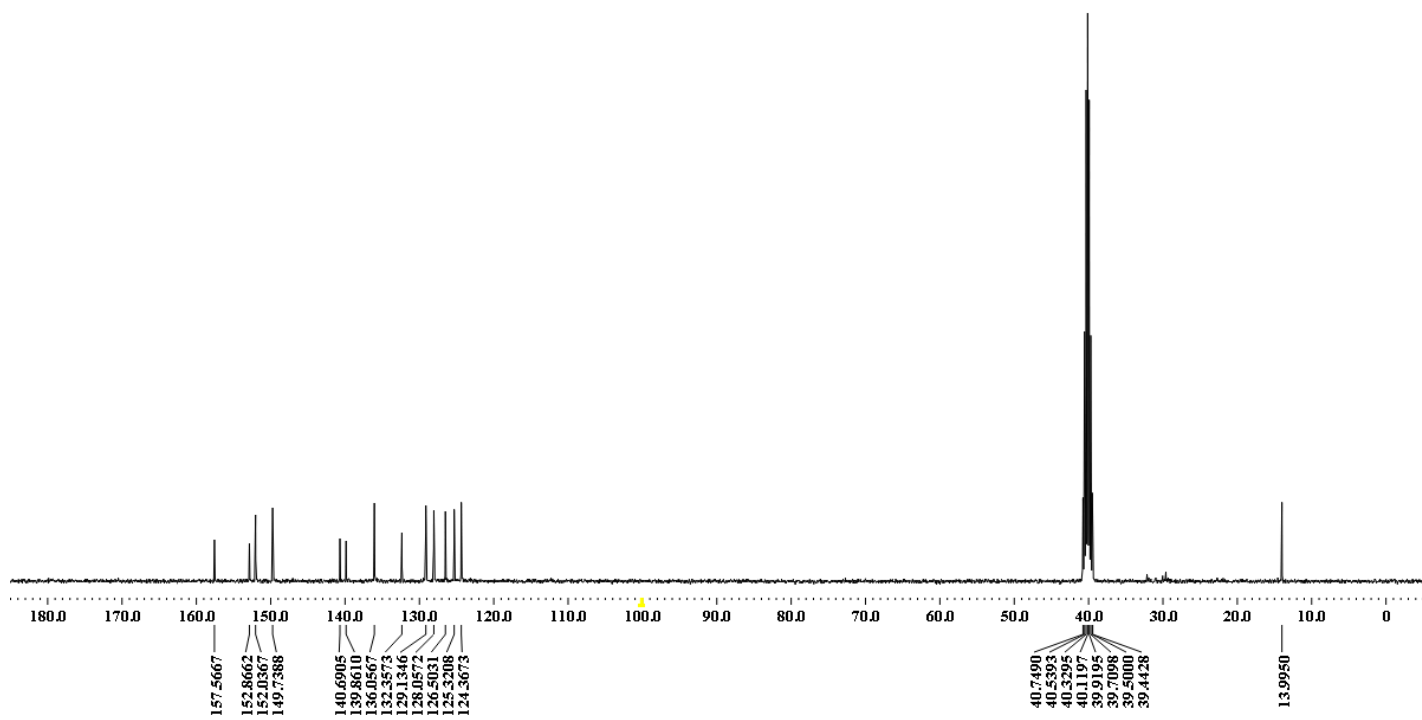

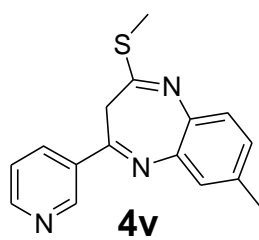

### <sup>1</sup>H NMR

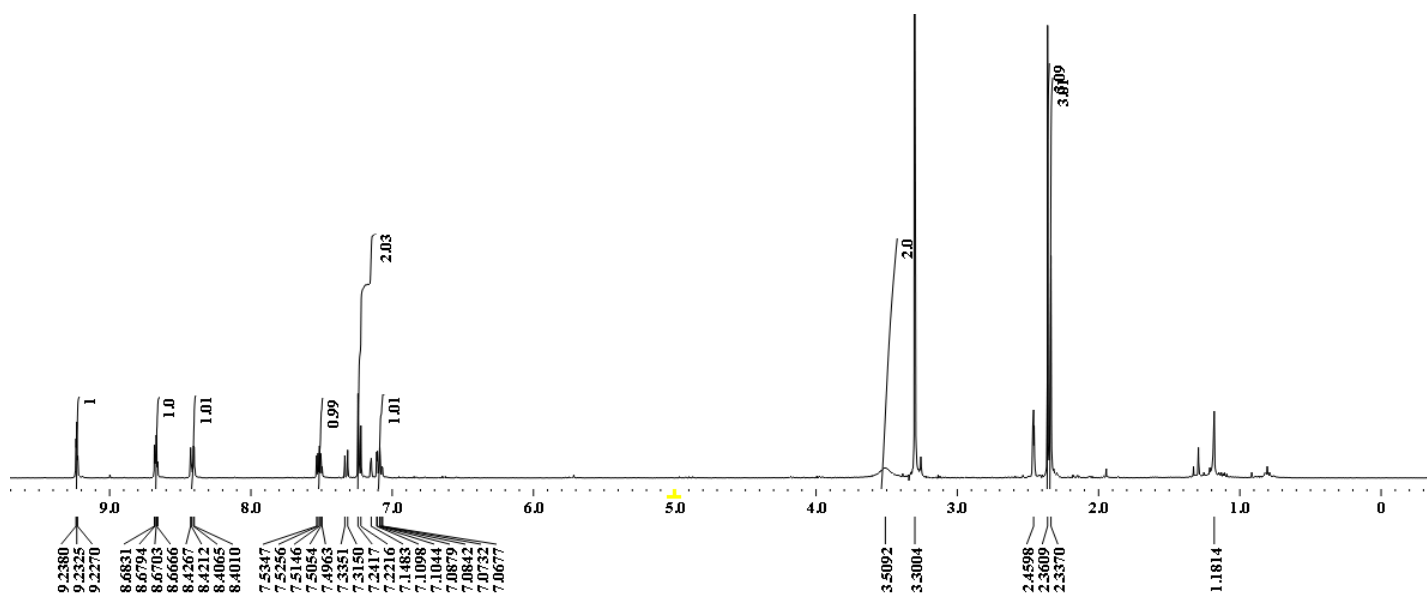

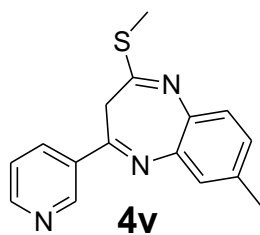

<sup>13</sup>C NMR

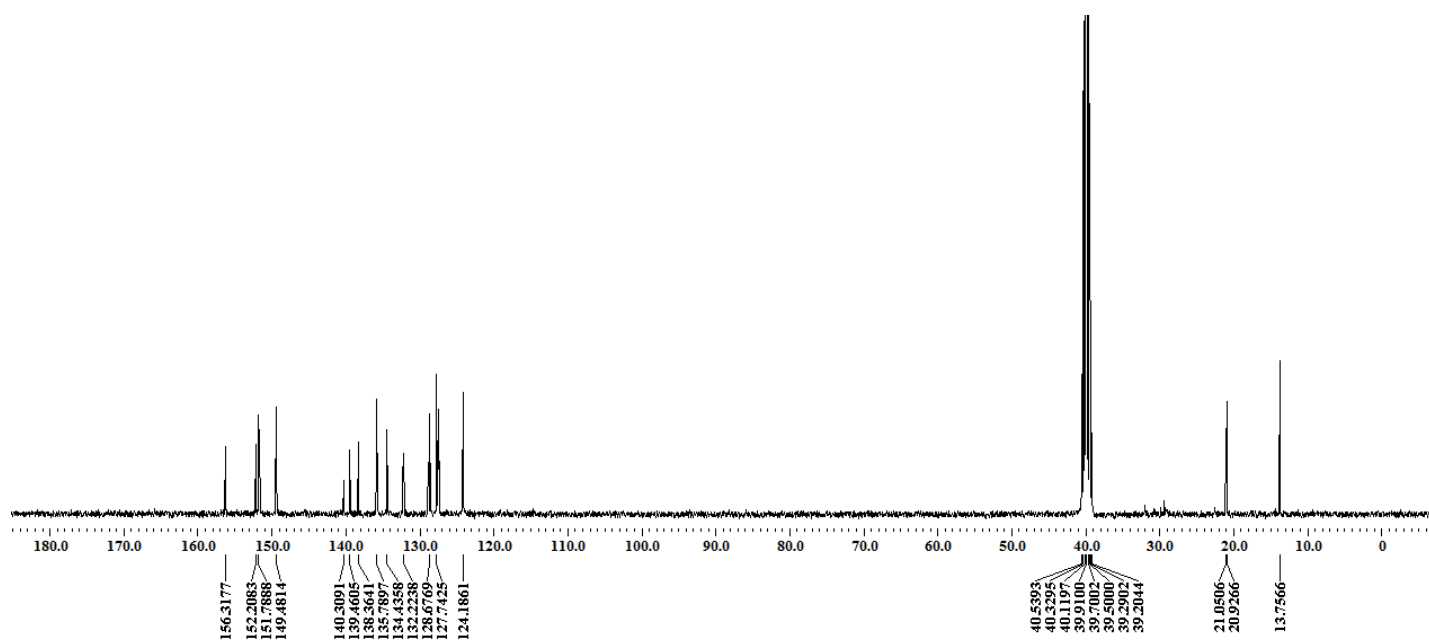



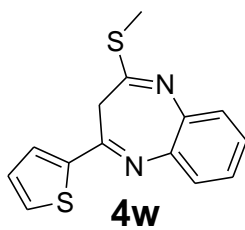

### <sup>1</sup>H NMR

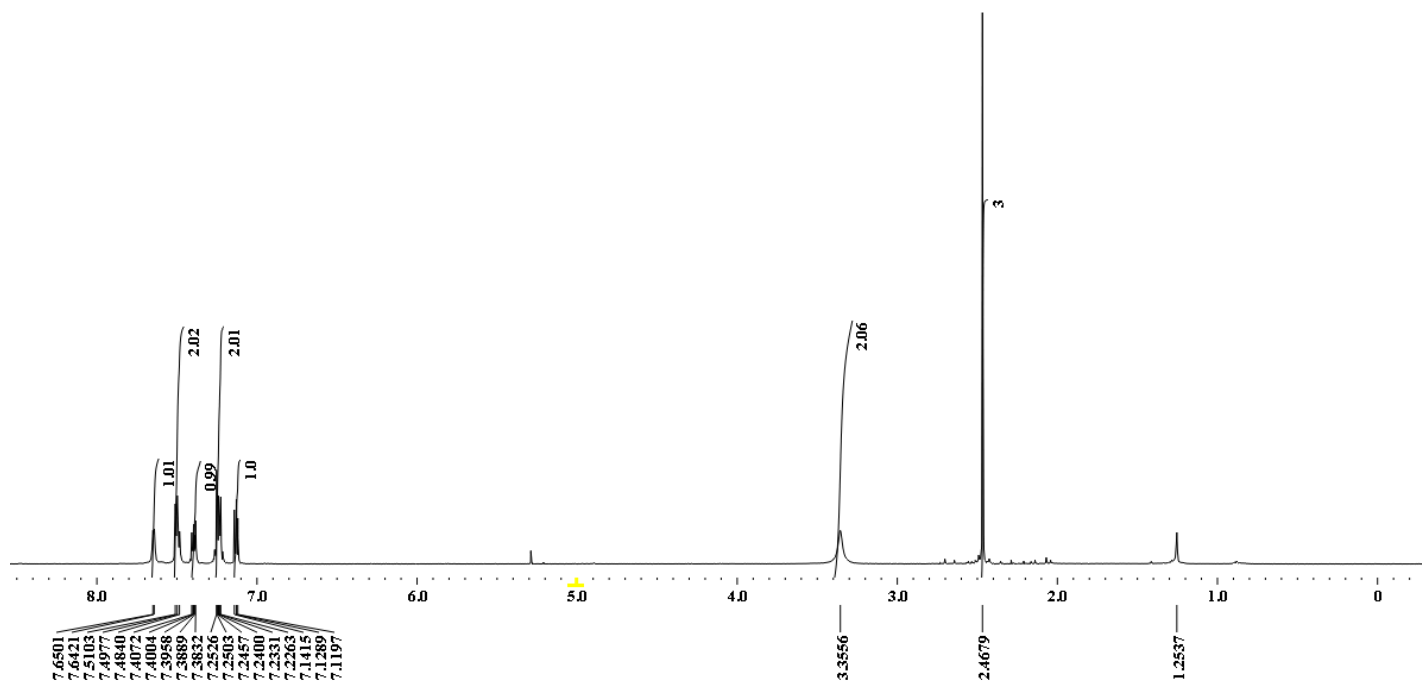

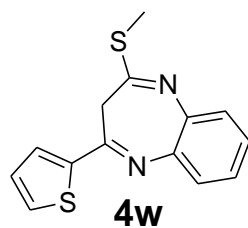

$^{13}\text{C}$  NMR

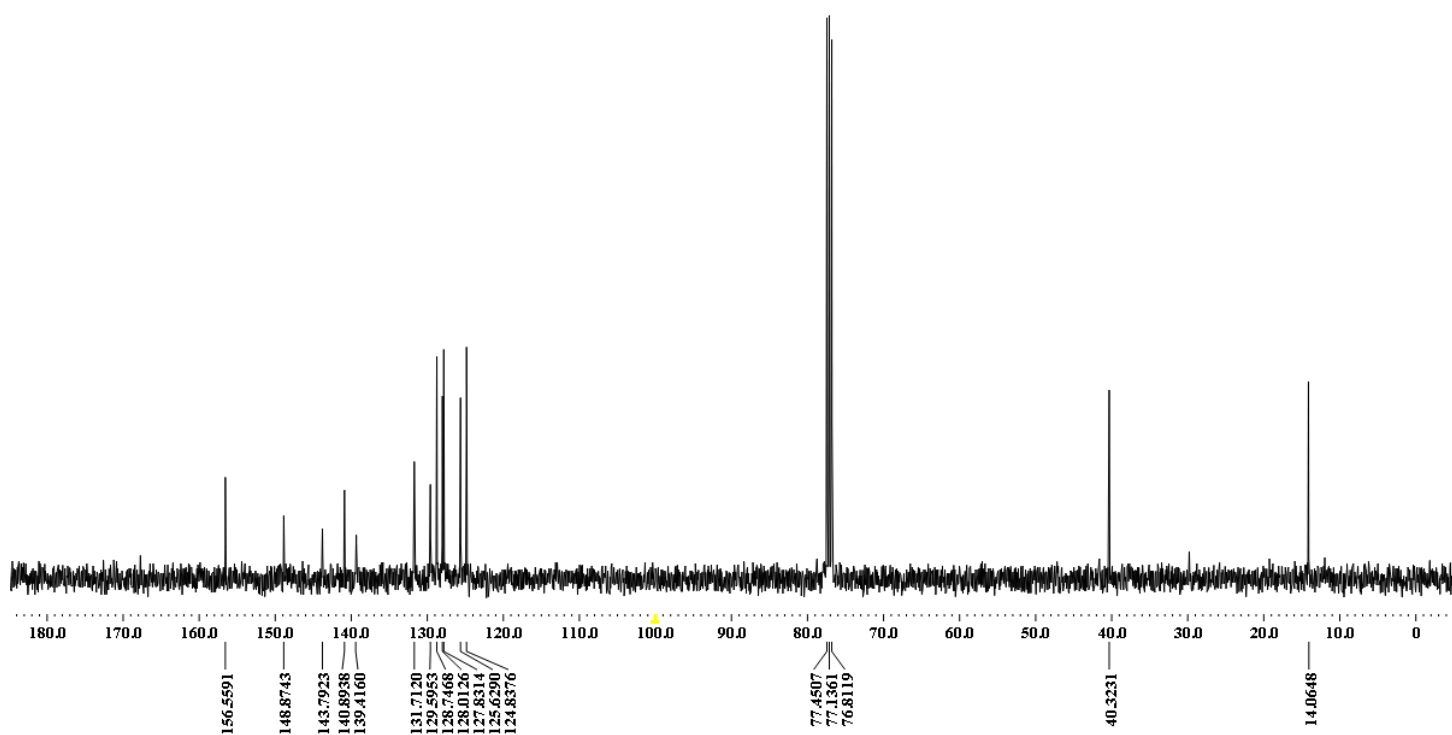

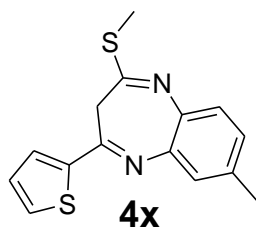

### <sup>1</sup>H NMR

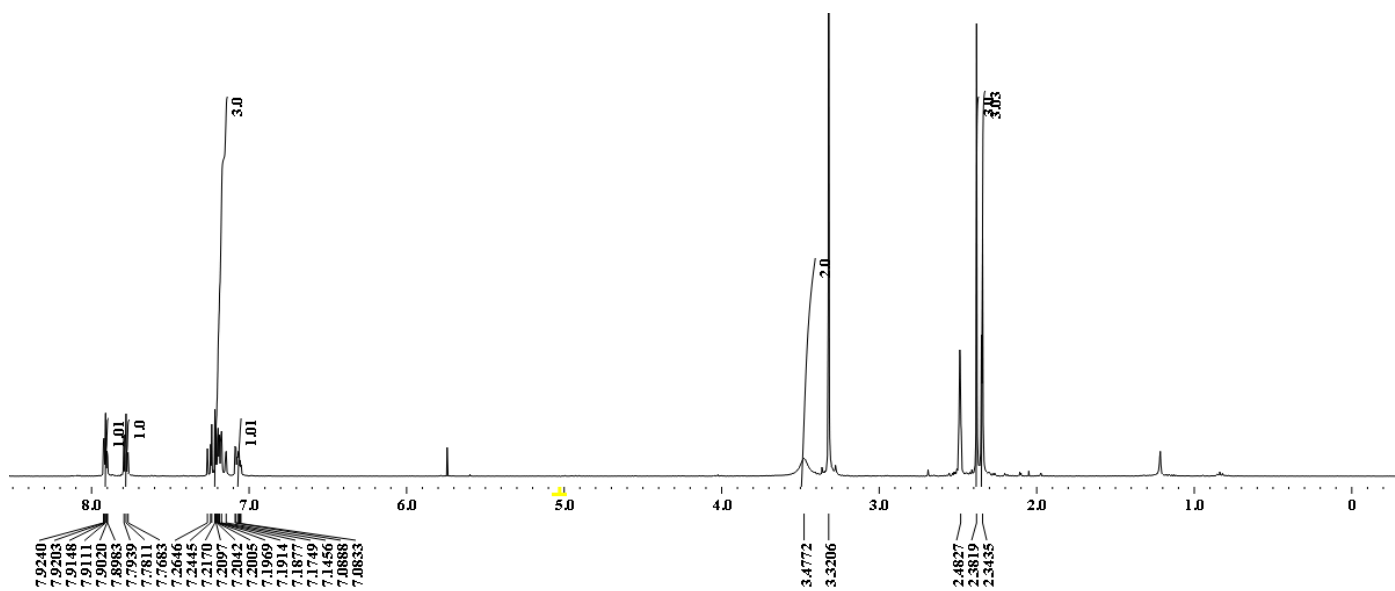

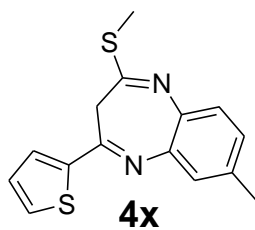

<sup>13</sup>C NMR

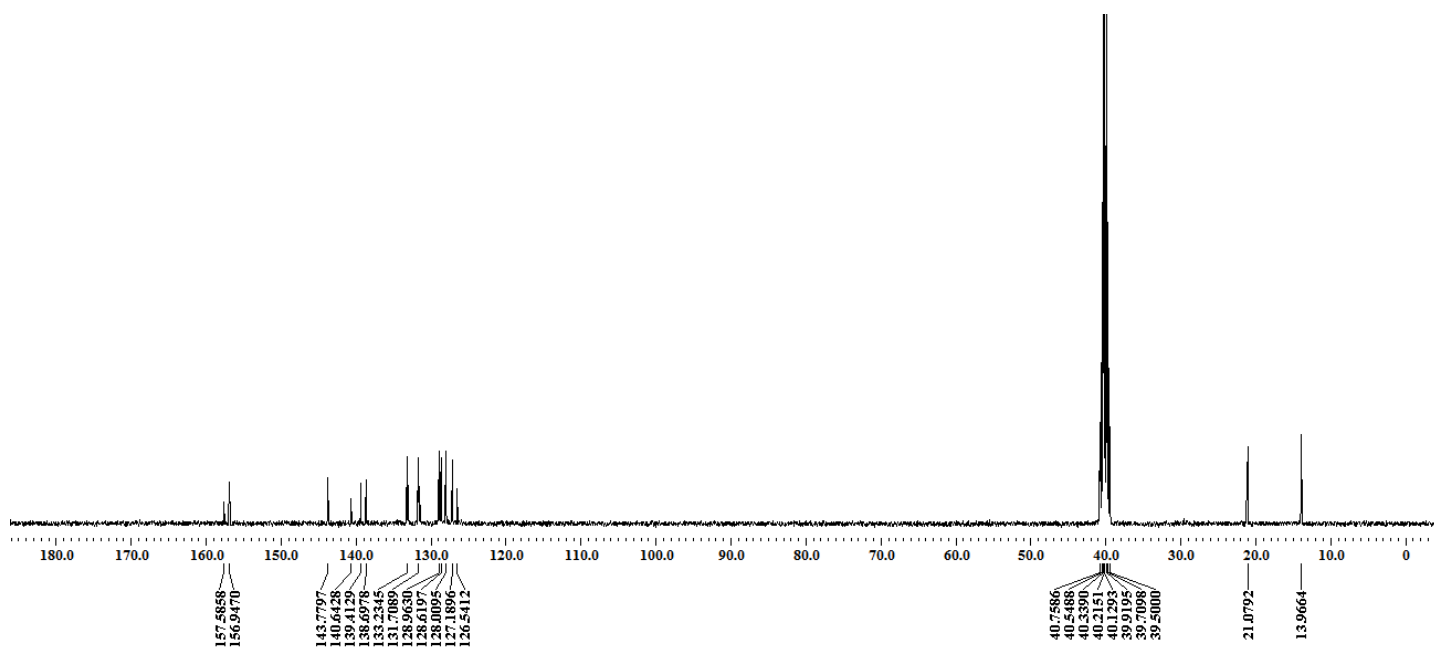

Supplement: c3ra43347a.pdf [file c3ra43347a.pdf]
